# Supplementary material for: Unraveling ligand exchange reactions in linear neutral Au(i) and Cu(i) N-heterocyclic carbene complexes for biological applications
Source: Royal Society of Chemistry journal article supplement (doi:10.1039/d3nj04945k), 2023-12-27
Supplement: d3nj04945k1.pdf [file d3nj04945k1.pdf]

## Supporting Information

# Unraveling Ligand Exchange Reactions in Linear Neutral Au(I) and Cu(I) N-heterocyclic carbene complexes for Biological Applications.

*Gustavo C. Rodrigues, Manoel V. F. Barrionuevo, Miguel A. San-Miguel, Camilla*

*Abbehausen\**

Institute of Chemistry, University of Campinas – UNICAMP, P.O. Box 6154, CEP 13083-970, Campinas, São Paulo, Brazil.

\*Corresponding author: [camilla@unicamp.br](mailto:camilla@unicamp.br)

## Index

|                                                                                                                                             |              |
|---------------------------------------------------------------------------------------------------------------------------------------------|--------------|
| <b>Table S1.</b> Comparison of calculated and experimental values for structural parameters of [Au(IMes)Cl] and [Cu(IMes)Cl] complexes..... | Page 3.      |
| <b>Figure S1.</b> Optimized structures of [Cu(IMes)Cl] .....                                                                                | Page 3.      |
| <b>Table S2.</b> Comparison of Energies with and without ZORA Correction .....                                                              | Page 4.      |
| <b>Table S3.</b> RMSD of Structures with and without ZORA Correction .....                                                                  | Page 4.      |
| <b>Table S4.</b> Comparison of Structures with and without D3BJ Correction .....                                                            | Page 4.      |
| <b>Table S5.</b> RMSD of Structures with and without D3BJ Correction .....                                                                  | Page 4.      |
| <b>Figure S2.</b> Fukui $f^+$ functions surfaces .....                                                                                      | Page 5.      |
| <b>Figure S3.</b> Fukui $f^-$ functions surfaces .....                                                                                      | Page 5.      |
| <b>Table S6.</b> Hirshfeld atomic charges .....                                                                                             | Page 6.      |
| <b>Table S7.</b> Mulliken atomic charges .....                                                                                              | Page 7.      |
| <b>Table S8.</b> Bader atomic charges .....                                                                                                 | Page 8.      |
| <b>Table S9.</b> Atomic coordinates of optimized structures.....                                                                            | Pages 9-110. |

**Table S1.** Comparison of calculated and experimental values for structural parameters of [Au(IMes)Cl] and [Cu(IMes)Cl] complexes<sup>1,2</sup>.

| Structural Parameter | [Au(IMes)Cl] |            | [Cu(IMes)Cl] |            |
|----------------------|--------------|------------|--------------|------------|
|                      | Experimental | Calculated | Experimental | Calculated |
| M-Cl (Å)             | 2.27         | 2.30       | 2.09         | 2.14       |
| M-C(1) (Å)           | 1.99         | 1.98       | 1.96         | 1.90       |
| N-C(1) (Å)           | -            | 1.35       | 1.31         | 1.35       |
| Cl-M-C(1) (°)        | 180.0        | 178.7      | 180.0        | 177.6      |

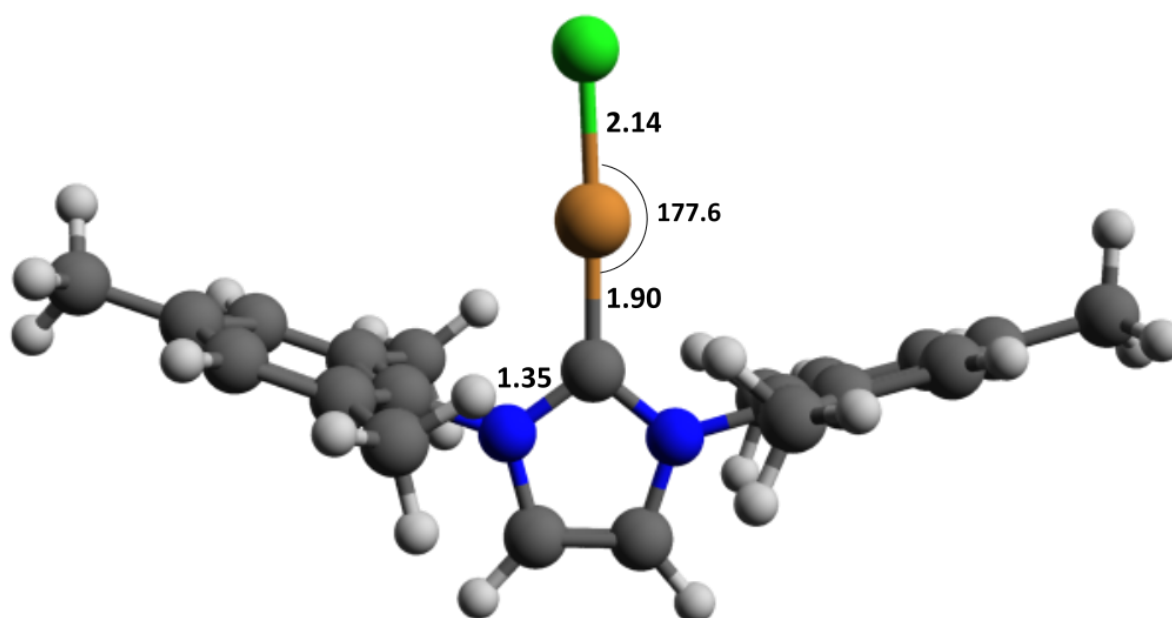

**Figure S1.** Optimized structures of [Cu(IMes)Cl]. The main distances (Å) and angles (degrees) are indicated. Carbon, hydrogen, nitrogen, gold and chlorine atoms are depicted by black, grey, blue, yellow and green spheres, respectively.

**Table S2.** Comparison of [Cu(IMes)Cl], [Cu(IMes)<sub>2</sub>]<sup>+</sup> and CuCl<sub>2</sub><sup>-</sup> energies calculated without ZORA corrections (PBE0, def2-TZVP, def2/J, RIJCOSX) and with ZORA corrections (PBE0, SARC-ZORA-TZVP for Cu(I), ZORA-def2-TZVP for other atoms, SARC/J, RIJCOSX). Values in hartree (Eh).

| Species                               | Without ZORA | With ZORA    | Relative Error |
|---------------------------------------|--------------|--------------|----------------|
| [Cu(IMes)Cl]                          | -3023.551511 | -3048.854815 | 0.83 %         |
| [Cu(IMes) <sub>2</sub> ] <sup>+</sup> | -3486.368007 | -3510.049617 | 0.67 %         |
| [CuCl <sub>2</sub> ] <sup>-</sup>     | -2560.716048 | -2587.639161 | 1.04 %         |

**Table S3.** Root-mean-square deviation (RMSD) from the superposition of calculated structures [Cu(IMes)Cl], [Cu(IMes)<sub>2</sub>]<sup>+</sup> and CuCl<sub>2</sub><sup>-</sup> without ZORA corrections (PBE0, def2-TZVP, def2/J, RIJCOSX) and with ZORA corrections (PBE0, SARC-ZORA-TZVP for Cu(I), ZORA-def2-TZVP for other atoms, SARC/J, RIJCOSX).

| Species                               | RMSD for ZORA (Å) |
|---------------------------------------|-------------------|
| [Cu(IMes)Cl]                          | 0.033             |
| [Cu(IMes) <sub>2</sub> ] <sup>+</sup> | 0.023             |
| [CuCl <sub>2</sub> ] <sup>-</sup>     | 0.019             |

**Table S4.** Comparison of [Cu(IMes)Cl], [Cu(IMes)<sub>2</sub>]<sup>+</sup>, CuCl<sub>2</sub><sup>-</sup>, and the ligand scrambling TS energies calculated without D3BJ dispersion corrections (PBE0, def2-TZVP, def2/J, RIJCOSX) and with D3BJ dispersion corrections (PBE0, def2-TZVP, def2/J, RIJCOSX, D3BJ). Values in hartree (Eh).

| Species                               | Without D3BJ | With D3BJ    | Relative Error |
|---------------------------------------|--------------|--------------|----------------|
| [Cu(IMes)Cl]                          | -3023.551511 | -3023.615549 | 0.002 %        |
| [Cu(IMes) <sub>2</sub> ] <sup>+</sup> | -3486.368007 | -3486.507865 | 0.004 %        |
| [CuCl <sub>2</sub> ] <sup>-</sup>     | -2560.716048 | -2560.718264 | 0.0001 %       |
| TS                                    | -6047.054234 | -6047.215027 | 0.003 %        |

**Table S5.** Root-mean-square deviation (RMSD) from the superposition of calculated structures of [Cu(IMes)Cl], [Cu(IMes)<sub>2</sub>]<sup>+</sup>, CuCl<sub>2</sub><sup>-</sup>, and the ligand scrambling TS without D3BJ dispersion corrections (PBE0, def2-TZVP, def2/J, RIJCOSX) and with D3BJ dispersion corrections (PBE0, def2-TZVP, def2/J, RIJCOSX, D3BJ).

| Species                               | RMSD for D3BJ (Å) |
|---------------------------------------|-------------------|
| [Cu(IMes)Cl]                          | 0.038             |
| [Cu(IMes) <sub>2</sub> ] <sup>+</sup> | 0.033             |
| [CuCl <sub>2</sub> ] <sup>-</sup>     | 0.000             |
| TS                                    | 0.585             |

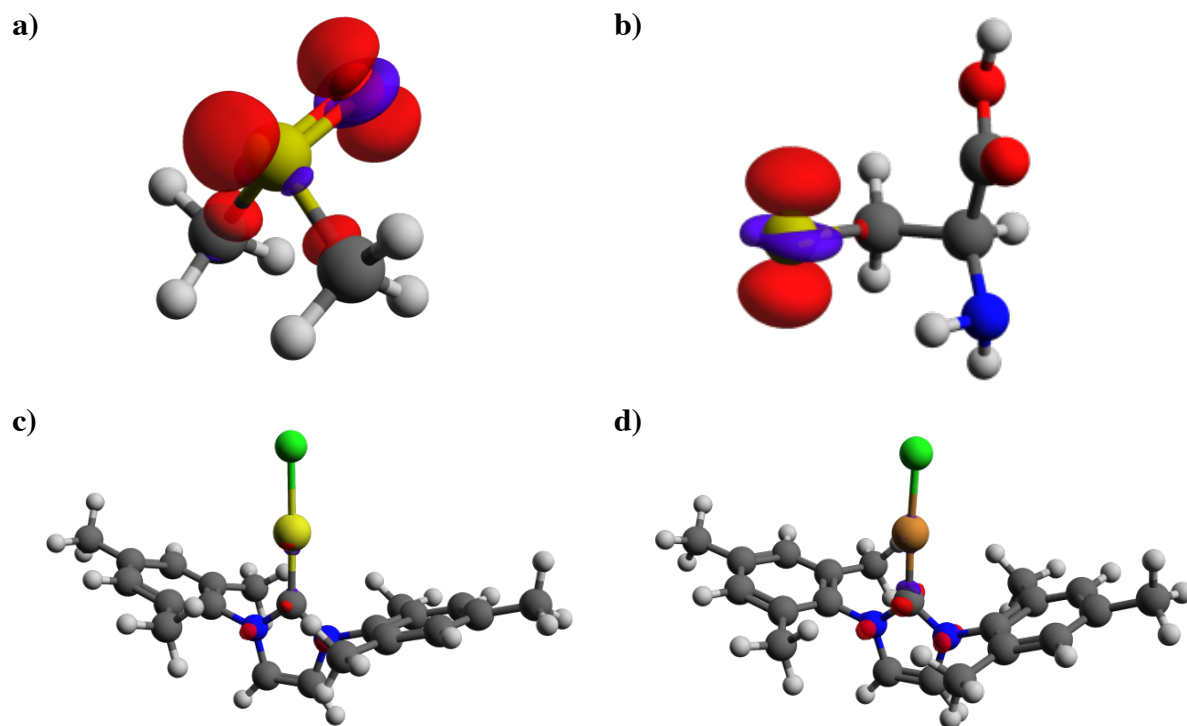

**Figure S2.** Calculated Fukui  $f^+$  functions surfaces of (a) DMSO, (b) Cys<sup>-</sup>, (c) [Au(IMes)Cl], and (d) [Cu(IMes)Cl]. Red are positive values and blue are negative values. The surfaces were plotted using isovalues of 0.01 a.u.

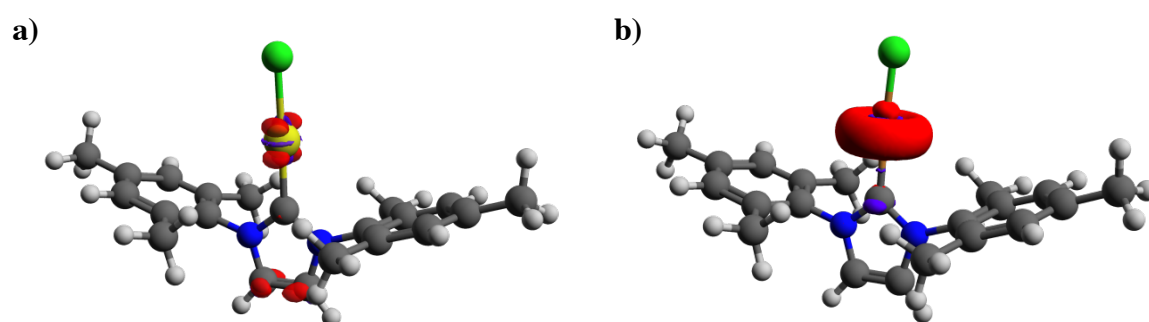

**Figure S3.** Calculated Fukui  $f^-$  functions surfaces of (a) [Au(IMes)Cl] and (b) [Cu(IMes)Cl]. Red are positive values and blue are negative values. The surfaces were plotted using isovalues of 0.01 a.u.

**Table S6.** Hirshfeld atomic charges (in a.u.) of key atoms in the reactants and products molecules for each reaction of [Au(IMes)Cl].

| <b>Atoms</b> | <b>Reactants<br/>[Au(IMes)Cl] and DMSO</b>            | <b>Products<br/>[Au(IMes)DMSO]<sup>+</sup> and Cl<sup>-</sup></b>                               |
|--------------|-------------------------------------------------------|-------------------------------------------------------------------------------------------------|
| Au           | 0.01                                                  | 0.14                                                                                            |
| Cl           | -0.49                                                 | -1.00                                                                                           |
| S            | 0.22                                                  | 0.32                                                                                            |
| <b>Atoms</b> | <b>Reactants<br/>[Au(IMes)Cl] and Cys<sup>-</sup></b> | <b>Products<br/>[Au(IMes)Cys] and Cl<sup>-</sup></b>                                            |
| Au           | 0.01                                                  | 0.00                                                                                            |
| Cl           | -0.49                                                 | -1.00                                                                                           |
| S            | -0.79                                                 | -0.38                                                                                           |
| <b>Atoms</b> | <b>Reactants<br/>2 [Au(IMes)Cl]</b>                   | <b>Products<br/>[Au(1)(IMes)<sub>2</sub>]<sup>+</sup> and [Au(2)Cl<sub>2</sub>]<sup>-</sup></b> |
| Au(1)        | 0.01                                                  | 0.06                                                                                            |
| Au(2)        | 0.01                                                  | -0.06                                                                                           |

**Table S7.** Mulliken atomic charges (in a.u.) of key atoms in the reactants and products molecules for each reaction of [Au(IMes)Cl].

| <b>Atoms</b> | <b>Reactants<br/>[Au(IMes)Cl] and DMSO</b>            | <b>Products<br/>[Au(IMes)DMSO]<sup>+</sup> and Cl<sup>-</sup></b>                               |
|--------------|-------------------------------------------------------|-------------------------------------------------------------------------------------------------|
| Au           | 0.27                                                  | 0.38                                                                                            |
| Cl           | -0.55                                                 | -1.00                                                                                           |
| S            | 0.47                                                  | 0.51                                                                                            |
| <b>Atoms</b> | <b>Reactants<br/>[Au(IMes)Cl] and Cys<sup>-</sup></b> | <b>Products<br/>[Au(IMes)Cys] and Cl<sup>-</sup></b>                                            |
| Au           | 0.27                                                  | 0.22                                                                                            |
| Cl           | -0.55                                                 | -1.00                                                                                           |
| S            | -0.94                                                 | -0.54                                                                                           |
| <b>Atoms</b> | <b>Reactants<br/>2 [Au(IMes)Cl]</b>                   | <b>Products<br/>[Au(1)(IMes)<sub>2</sub>]<sup>+</sup> and [Au(2)Cl<sub>2</sub>]<sup>-</sup></b> |
| Au(1)        | 0.27                                                  | 0.68                                                                                            |
| Au(2)        | 0.27                                                  | 0.19                                                                                            |

**Table S8.** Bader (AIM) charges of key atoms in the reactants and products molecules for each reaction of [Au(IMes)Cl].

| <b>Atoms</b> | <b>Reactants<br/>[Au(IMes)Cl] and DMSO</b>            | <b>Products<br/>[Au(IMes)DMSO]<sup>+</sup> and Cl<sup>-</sup></b>                               |
|--------------|-------------------------------------------------------|-------------------------------------------------------------------------------------------------|
| Au           | 0.20                                                  | 3.89                                                                                            |
| Cl           | -0.64                                                 | -0.64                                                                                           |
| S            | 1.29                                                  | 1.36                                                                                            |
| <b>Atoms</b> | <b>Reactants<br/>[Au(IMes)Cl] and Cys<sup>-</sup></b> | <b>Products<br/>[Au(IMes)Cys] and Cl<sup>-</sup></b>                                            |
| Au           | 0.20                                                  | 0.09                                                                                            |
| Cl           | -0.64                                                 | -0.64                                                                                           |
| S            | -0.83                                                 | -0.45                                                                                           |
| <b>Atoms</b> | <b>Reactants<br/>2 [Au(IMes)Cl]</b>                   | <b>Products<br/>[Au(1)(IMes)<sub>2</sub>]<sup>+</sup> and [Au(2)Cl<sub>2</sub>]<sup>-</sup></b> |
| Au(1)        | 0.20                                                  | 2.09                                                                                            |
| Au(2)        | 0.20                                                  | 0.19                                                                                            |



**Table S9.** Coordinates (x, y, z) of optimized structures of [M(IMes)Cl], [M(IMes)DMSO]<sup>+</sup>, [M(IMes)Cys], [M(IMes)<sub>2</sub>]<sup>+</sup>, [MCl<sub>2</sub>]<sup>-</sup> (M = Au(I), Cu(I)), DMSO and Cysteine, as also as TS, AR and AP for each reaction (Chloride substitution for DMSO, Cysteine, and Ligand Scrambling Reaction).

**[Cu(IMes)Cl]**

Coordinates from ORCA-job

|    |                   |                   |                   |
|----|-------------------|-------------------|-------------------|
| H  | 6.75882048212956  | 2.18869711053716  | -1.13893783917599 |
| C  | 6.13554597820440  | 2.16153478448404  | -0.25021444544031 |
| Cl | 4.85475942761483  | -2.89803147276496 | 2.44225105534884  |
| C  | 4.30120149015103  | 1.21787185349777  | -1.68136110432011 |
| C  | 4.83409301076773  | 1.68589619972638  | -0.36193490516865 |
| Cu | 3.47043638784246  | -1.43481610362023 | 1.70332340066749  |
| H  | -1.23755514082619 | -3.79632267547751 | -0.65247263096251 |
| C  | -0.99898754008468 | -3.13534053708821 | 0.17523576957041  |
| C  | 8.07519107259142  | 3.07160464550809  | 1.06246367008224  |
| C  | 6.65671958204397  | 2.59821854161676  | 0.96383223006666  |
| C  | -1.54631242691978 | -3.38602442901470 | 1.42837300544638  |
| C  | -2.48577149942753 | -4.53380939154214 | 1.64317076746165  |
| C  | -0.15023820845656 | -2.05673251690637 | -0.05407633465749 |
| C  | 0.42181168931920  | -1.80942496616227 | -1.41625250413548 |
| C  | -1.22000650398078 | -2.53038560832865 | 2.47642072022805  |
| C  | 0.14634915742977  | -1.22266014233702 | 1.02313798356240  |
| C  | 2.32567419587034  | -0.07318247456970 | 1.03857644535617  |
| C  | 4.04944011199219  | 1.65875372106058  | 0.79220712632648  |
| C  | -0.37781870939326 | -1.43928413785159 | 2.29873386402672  |
| C  | 5.83743509546823  | 2.56188188628665  | 2.08675098911830  |
| H  | -1.63546569043791 | -2.71235467720031 | 3.46308641199917  |

|   |                   |                   |                   |
|---|-------------------|-------------------|-------------------|
| N | 0.99511337918437  | -0.09131696470717 | 0.80701347802352  |
| N | 2.70455199603549  | 1.17924009466430  | 0.70116438547831  |
| C | 4.52814572112049  | 2.09608751445993  | 2.02717965946124  |
| C | -0.04720137428518 | -0.53352941121010 | 3.44483939046467  |
| C | 0.55116885210275  | 1.12606104530061  | 0.33403077587648  |
| C | 1.63287117591527  | 1.93023076625445  | 0.26755399274766  |
| H | 6.22388117655787  | 2.90936900457977  | 3.04007418879921  |
| H | -0.48337177692885 | 1.30679335998357  | 0.09447660150690  |
| H | 1.73583250972229  | 2.95694423885727  | -0.04165007391562 |
| C | 3.67191969896842  | 2.06485081587216  | 3.25569556842760  |
| H | 1.01358429045124  | -0.59612824793394 | 3.70407922433677  |
| H | -0.62969364134041 | -0.80543498612737 | 4.32509844594607  |
| H | -0.25557731863828 | 0.51159884420941  | 3.20256256171253  |
| H | -3.52101199834804 | -4.18135797149376 | 1.68806089351076  |
| H | -2.27883155451896 | -5.04541387520625 | 2.58560887604577  |
| H | -2.41771232846381 | -5.25909932661953 | 0.83106386273267  |
| H | 0.12829304033976  | -2.60394080070081 | -2.10227958345603 |
| H | 1.51369686258676  | -1.76464803404233 | -1.38695235117726 |
| H | 0.07379391127800  | -0.85836589904520 | -1.82862852261723 |
| H | 2.71362761746079  | 2.56364536228272  | 3.09067193565740  |
| H | 4.17881165938656  | 2.55694369300318  | 4.08583748644117  |
| H | 3.44985640308441  | 1.03547517862404  | 3.55237286947870  |
| H | 8.38286014618550  | 3.59507827566378  | 0.15525545041005  |
| H | 8.75485864745263  | 2.22382744813942  | 1.19507537683527  |
| H | 8.21182832080500  | 3.73850466022967  | 1.91520264241186  |
| H | 5.08954186872455  | 1.22466735518594  | -2.43402399445014 |
| H | 3.48958700721099  | 1.85964361490645  | -2.03525860016458 |

H 3.89964374605159 0.20351463501601 -1.61120821592429

## [Cu(IMes)Cl] - ZORA

Coordinates from ORCA-job

|    |                   |                   |                   |
|----|-------------------|-------------------|-------------------|
| H  | 6.76521524752041  | 2.16872822884449  | -1.12962901010873 |
| C  | 6.13728246143822  | 2.14946209114439  | -0.24402437548552 |
| Cl | 4.82228306625881  | -2.85546994879325 | 2.39770082265682  |
| C  | 4.30217952773560  | 1.21672984531340  | -1.68086276554619 |
| C  | 4.83243653825332  | 1.68502462976216  | -0.36084187003496 |
| Cu | 3.44867836480635  | -1.40525474469163 | 1.67691418147544  |
| H  | -1.23079592119931 | -3.79911194741883 | -0.64905248750129 |
| C  | -0.99295187241582 | -3.13624499008655 | 0.17728942904393  |
| C  | 8.07968816783870  | 3.04059984101853  | 1.07617323027745  |
| C  | 6.65679335414650  | 2.58283505574617  | 0.97160167908172  |
| C  | -1.53113340354403 | -3.39112222911932 | 1.43324392853278  |
| C  | -2.45932081554109 | -4.54668888613760 | 1.65337308963109  |
| C  | -0.15332961405661 | -2.05162874695143 | -0.05611210168026 |
| C  | 0.41255276030410  | -1.80215601452622 | -1.42016459962814 |
| C  | -1.20597417277285 | -2.53334051031650 | 2.47966047094510  |
| C  | 0.14303530170280  | -1.21580869885961 | 1.01947936332283  |
| C  | 2.31790983773489  | -0.06192876812632 | 1.03068449082037  |
| C  | 4.04258039416789  | 1.66668908802090  | 0.78952529015950  |
| C  | -0.37283065511609 | -1.43633281695633 | 2.29764120351510  |
| C  | 5.83218561355873  | 2.55683928775329  | 2.09069789638946  |
| H  | -1.61427093815313 | -2.71878224293145 | 3.46861434983219  |
| N  | 0.98740556697348  | -0.08174207268638 | 0.80055423608191  |
| N  | 2.69647515392654  | 1.19116550402202  | 0.69581506030147  |
| C  | 4.51933696804924  | 2.10266655262996  | 2.02564519655691  |
| C  | -0.04075698727945 | -0.53048082608470 | 3.44285840264079  |

|   |                   |                   |                   |
|---|-------------------|-------------------|-------------------|
| C | 0.54285712694909  | 1.13604790597114  | 0.33009527553198  |
| C | 1.62382048388758  | 1.94123230546454  | 0.26434032192557  |
| H | 6.21759089155312  | 2.90161333068937  | 3.04535929011833  |
| H | -0.49197937437465 | 1.31624939505554  | 0.09175740875069  |
| H | 1.72571951910139  | 2.96861177633688  | -0.04277795393743 |
| C | 3.65860396826831  | 2.07891686452937  | 3.25084460944514  |
| H | 1.02022148984339  | -0.59428482285257 | 3.70111828655423  |
| H | -0.62247735303400 | -0.80192385528323 | 4.32373288432572  |
| H | -0.24829054091819 | 0.51474773869163  | 3.20074190244296  |
| H | -3.49743932357631 | -4.20345101951683 | 1.70245685991365  |
| H | -2.24362223362666 | -5.05510855631396 | 2.59552440822107  |
| H | -2.38836874294051 | -5.27232138146463 | 0.84188069518146  |
| H | 0.11384156622498  | -2.59432832627848 | -2.10660120714261 |
| H | 1.50472057242710  | -1.76090353071251 | -1.39551724741875 |
| H | 0.06568662566096  | -0.84913583186114 | -1.82868245297749 |
| H | 2.70437398175018  | 2.58403907003689  | 3.08206070744830  |
| H | 4.16601792258945  | 2.56839321657074  | 4.08214554204275  |
| H | 3.42877995980513  | 1.05135142298376  | 3.54781463363955  |
| H | 8.39674970760811  | 3.56153025956706  | 0.17079276217381  |
| H | 8.74947378584095  | 2.18527045321917  | 1.21050350748755  |
| H | 8.22028869039876  | 3.70500489752418  | 1.93016125060904  |
| H | 5.09252661646892  | 1.22152835711074  | -2.43138965838886 |
| H | 3.49209754621257  | 1.85876748666209  | -2.03751763132219 |
| H | 3.89952316954275  | 0.20283616330107  | -1.61039930590436 |

**[Cu(IMes)Cl] - D3BJ**

Coordinates from ORCA-job

|    |                   |                   |                   |
|----|-------------------|-------------------|-------------------|
| H  | 6.77949912748020  | 2.15333438361076  | -1.09918419785519 |
| C  | 6.13692072465352  | 2.13621824097072  | -0.22433072072311 |
| Cl | 4.82824634394037  | -2.84916862233417 | 2.41952446055976  |
| C  | 4.30643392662014  | 1.22398682127471  | -1.68669855262170 |
| C  | 4.82907401594072  | 1.68768528100045  | -0.36305166235923 |
| Cu | 3.44206851863893  | -1.39587423396198 | 1.67297332055507  |
| H  | -1.24984189612591 | -3.79256264704164 | -0.63315338633079 |
| C  | -0.99665071532560 | -3.12624962028363 | 0.18560116812258  |
| C  | 8.06670678774714  | 2.99763097059293  | 1.13152832919928  |
| C  | 6.64123190944155  | 2.55574154253372  | 1.00280257499213  |
| C  | -1.49691663848001 | -3.38566178799342 | 1.45653242811638  |
| C  | -2.40758949810468 | -4.54967429129398 | 1.70108674026464  |
| C  | -0.17387925878074 | -2.03396808363892 | -0.06892419932152 |
| C  | 0.36564640218837  | -1.77522416497555 | -1.44093216665740 |
| C  | -1.15056732706760 | -2.52707090418279 | 2.49587122602135  |
| C  | 0.13928884115785  | -1.19656337105562 | 0.99852732778080  |
| C  | 2.30156844829634  | -0.04309381198529 | 1.00171591835190  |
| C  | 4.02387216812772  | 1.67448828319217  | 0.77459344716913  |
| C  | -0.33369522723014 | -1.42251448627737 | 2.29078848668705  |
| C  | 5.80148490652660  | 2.52922479103858  | 2.11087876442010  |
| H  | -1.52777315155582 | -2.71924689320181 | 3.49562065393289  |
| N  | 0.97407188974327  | -0.06285917383692 | 0.76256035232640  |
| N  | 2.67964701008879  | 1.20727722542023  | 0.66172355295422  |

|   |                   |                   |                   |
|---|-------------------|-------------------|-------------------|
| C | 4.48520541736361  | 2.09065308774408  | 2.02174565034845  |
| C | 0.03367281352594  | -0.51215983299709 | 3.42041442732358  |
| C | 0.52902406920341  | 1.15155228492120  | 0.28223389123526  |
| C | 1.61083784143909  | 1.95714625963901  | 0.21860425573994  |
| H | 6.17795693962829  | 2.86025066766652  | 3.07372466000439  |
| H | -0.50503779529628 | 1.32713956901490  | 0.03794268918842  |
| H | 1.71765168618183  | 2.98254383034607  | -0.09277850135883 |
| C | 3.59987061280104  | 2.05569522105132  | 3.22795536824604  |
| H | 1.10467641102041  | -0.56880605219265 | 3.63542291546950  |
| H | -0.51279458907031 | -0.78355520829919 | 4.32328970163240  |
| H | -0.18746047502701 | 0.53067110580317  | 3.18017882505690  |
| H | -3.44712312570597 | -4.21570842855558 | 1.77544393639972  |
| H | -2.16303264546523 | -5.05390728003701 | 2.63824839707292  |
| H | -2.34944979111583 | -5.27510998059924 | 0.88855119149084  |
| H | 0.07392983516971  | -2.57358049939160 | -2.12285056865783 |
| H | 1.45696399280204  | -1.71034157022791 | -1.42866988073667 |
| H | -0.00535426146463 | -0.82900789647014 | -1.84368079758231 |
| H | 2.65872353763626  | 2.58133555908559  | 3.04865388644526  |
| H | 4.09774571511269  | 2.51591076495605  | 4.08110513473583  |
| H | 3.34362332421570  | 1.02541571422150  | 3.49236001355157  |
| H | 8.40110859007798  | 3.52336549639449  | 0.23533014084184  |
| H | 8.72512411824875  | 2.13392257593613  | 1.26728009377918  |
| H | 8.20135123271091  | 3.65276405781858  | 1.99347737739227  |
| H | 5.10305515777508  | 1.21668354925089  | -2.43020336676527 |
| H | 3.50664456256767  | 1.87472138221048  | -2.05030511387099 |
| H | 3.88962951774345  | 0.21588017513920  | -1.61429819256732 |

**[Cu(IMes)DMSO]<sup>+</sup>**

Coordinates from ORCA-job

|    |                    |                   |                   |
|----|--------------------|-------------------|-------------------|
| H  | -2.32051643387473  | -6.13945630704261 | 1.96294251480992  |
| H  | -0.30317773032344  | -5.05604695963295 | 1.58297047855967  |
| H  | 1.71985810486829   | -3.15001590290736 | 1.77534396596008  |
| C  | -2.97290728299913  | -5.42902440208047 | 1.45534338524070  |
| H  | -3.71549960829217  | -5.07157887098689 | 2.17411422604885  |
| C  | -0.79357010962170  | -4.25072932613570 | 1.04430978887974  |
| C  | 1.45747589487807   | -3.18685434871158 | 0.71415556662036  |
| H  | -3.51809775254119  | -5.96415976272284 | 0.67333211354940  |
| C  | -2.17337094524120  | -4.29560073610550 | 0.88992419159365  |
| H  | 1.90516582021419   | -2.32213845081045 | 0.22291033078871  |
| H  | -6.75882806586004  | -4.59130458434297 | 2.50810822526418  |
| C  | -0.02953926553934  | -3.20666137610679 | 0.52897174095476  |
| H  | -8.42943397260474  | -5.11050404478374 | 2.78353242505325  |
| C  | -7.75637015580318  | -4.64452113050035 | 2.06399914012388  |
| H  | 1.91540368642267   | -4.09024157253344 | 0.30257283334695  |
| C  | -2.78385723192026  | -3.24941239167765 | 0.19526226076277  |
| H  | -10.03954550758945 | -3.43794645683336 | 2.85161316498256  |
| H  | -7.68316795847696  | -5.30046764683392 | 1.19224016971651  |
| C  | -0.67871209457039  | -2.18839168329764 | -0.15859637630383 |
| C  | -8.25652835966752  | -3.28454463369906 | 1.68522704086067  |
| C  | -9.46481632711153  | -2.80590212297493 | 2.18149472575935  |
| N  | -4.20393474920291  | -3.27456434049503 | 0.01587302863488  |
| C  | -5.08147058164425  | -2.66309089880804 | 0.83715061536140  |
| Cu | -4.68259256801140  | -1.64417461229501 | 2.41554794594452  |
| C  | -4.85101043974446  | -3.91044081747377 | -1.02137212580124 |
| C  | -2.05883771576311  | -2.18685583394807 | -0.34081596128311 |
| N  | -6.28926100398496  | -2.92479244170379 | 0.29822534503716  |



|   |                    |                   |                   |
|---|--------------------|-------------------|-------------------|
| C | -6.17118877270852  | -3.68904826702030 | -0.84265838711975 |
| C | -7.53063817741228  | -2.45331018557387 | 0.83287837747350  |
| S | -4.12572749676241  | -0.48160652908575 | 4.21524411273581  |
| H | -4.31879941820725  | -4.45432489643278 | -1.78381363447991 |
| H | -11.25464022160988 | 0.00841373295939  | 2.55602165596738  |
| H | -0.09798268927973  | -1.36880029892019 | -0.57052614737641 |
| C | -9.94990001375993  | -1.54656786433888 | 1.84571293652170  |
| H | -12.06532739100499 | -1.25855060780392 | 1.64131710091069  |
| C | -11.27000471556685 | -1.06691092119220 | 2.36852208103479  |
| H | -7.02734302245619  | -4.00018405490677 | -1.41755728045342 |
| C | -7.97578477653120  | -1.18053993853296 | 0.47379594008689  |
| C | -9.19040524162603  | -0.74937193550577 | 0.99479701911352  |
| C | -2.73178021756011  | -1.07507711871800 | -1.08553663775899 |
| H | -7.74346123021216  | 0.59437323942036  | -0.69584128379660 |
| H | -1.99131747247670  | -0.38142414612652 | -1.48357708338122 |
| C | -7.17386941901659  | -0.29641553439946 | -0.43107147557709 |
| H | -9.55128737503765  | 0.23891420567370  | 0.72606643985343  |
| H | -11.53935120430827 | -1.57966652279754 | 3.29321894694033  |
| H | -3.32989032036886  | -1.45504295342588 | -1.91775793977420 |
| H | -6.24658552490817  | 0.02323081264191  | 0.05329833880751  |
| H | -3.40898965705121  | -0.51599148481540 | -0.43370805625149 |
| H | -6.89133415965243  | -0.81218233549703 | -1.35200931448493 |
| C | -5.19264811173655  | -0.86030780262947 | 5.58206974676921  |
| H | -4.92256319158967  | -0.20632534369460 | 6.41285663241955  |
| H | -5.02940774630384  | -1.90688514374187 | 5.83707974987342  |
| H | -6.22548454616770  | -0.70019139140133 | 5.26947857829656  |
| C | -4.50311542254245  | 1.23774224664945  | 3.98708221028687  |
| H | -3.87681911701206  | 1.59911404670571  | 3.17215207195703  |
| H | -4.27859309631511  | 1.76171750531218  | 4.91756912187325  |

|   |                   |                   |                  |
|---|-------------------|-------------------|------------------|
| H | -5.55844994692505 | 1.32717723195896  | 3.72528851591537 |
| O | -2.71836794988422 | -0.61250608931682 | 4.65339690315122 |

## [Cu(IMes)Cys]

Coordinates from ORCA-job

|    |                   |                   |                   |
|----|-------------------|-------------------|-------------------|
| H  | 5.15508132764776  | 1.09512579356601  | -2.61020069120096 |
| H  | 4.11154036294849  | 0.15757024217288  | -1.52840219608661 |
| C  | 4.47325100193251  | 1.16203600308522  | -1.76238492506492 |
| H  | 6.92806281508652  | 2.27729390682472  | -1.68272193589599 |
| H  | 2.41156273783053  | -2.04895095686570 | -0.59860295692574 |
| H  | 1.09017039104976  | -3.04103652519518 | -1.23434850332468 |
| C  | 1.32419845777930  | -2.13742860602256 | -0.67151053277039 |
| H  | 3.60511758882623  | 1.75051523550999  | -2.07256821201720 |
| Cu | 4.14356746184478  | -1.23230156698952 | 1.96526844055353  |
| H  | -0.15874766189941 | -4.12398111692899 | 0.39352393556555  |
| C  | 6.44107383612014  | 2.31632475536268  | -0.71311212854769 |
| C  | 5.16255716694098  | 1.78065123474662  | -0.58523503350381 |
| C  | -0.04880863155882 | -3.29365960582879 | 1.08461007417314  |
| C  | 0.69341316168699  | -2.18736121016693 | 0.68616752759506  |
| H  | 8.79952803211985  | 3.44845172798850  | -0.84143591296700 |
| H  | -1.08067006471349 | -5.46951694537163 | 2.27325438018964  |
| H  | 0.97096804840733  | -1.27505439810641 | -1.24341600872087 |
| H  | -1.48386948255157 | -4.68690789755372 | 3.81319016643433  |
| C  | -1.46774183192416 | -4.55671551165559 | 2.72984710110196  |
| C  | 2.93769146480579  | 0.09103401498045  | 1.29069776093509  |
| C  | -0.64957469268248 | -3.36386613819107 | 2.33771906367878  |
| C  | 8.48302198214672  | 3.46485220092386  | 0.20218077033265  |
| C  | 7.10518348741877  | 2.89579200525306  | 0.36098948086832  |
| C  | 0.83022486702517  | -1.13464870368839 | 1.59240303832180  |
| C  | 4.55354568493216  | 1.84107209019102  | 0.66728526970360  |

|   |                   |                   |                  |
|---|-------------------|-------------------|------------------|
| H | 9.21069717582968  | 2.89447372855677  | 0.78657354003977 |
| N | 1.59123072992303  | 0.01384015021790  | 1.20744937010182 |
| N | 3.22857229096419  | 1.32027788854290  | 0.81013143716884 |
| C | -0.49015705738054 | -2.29102561593802 | 3.20844899439177 |
| C | 0.24609317539877  | -1.16358835399465 | 2.85849015671812 |
| C | 6.46154845631151  | 2.93176487361228  | 1.59521064079975 |
| C | 5.18488359761864  | 2.41289776658468  | 1.77396195028811 |
| H | -2.50413584672820 | -4.43982629770580 | 2.39744132022170 |
| C | 2.08661551704020  | 1.99782434594501  | 0.43581610083936 |
| H | 8.52483840414671  | 4.49733302963063  | 0.55830457868836 |
| C | 1.05020394570316  | 1.17116847027890  | 0.68733528252087 |
| H | -0.94364910352927 | -2.33215864190721 | 4.19417137718497 |
| H | 1.46781580740625  | 0.19450094752271  | 3.99374594688419 |
| C | 0.41155842769676  | -0.02777541122582 | 3.82043045539294 |
| H | 6.96402191245431  | 3.38223011824423  | 2.44608513727857 |
| H | -0.01003229064161 | 1.29908560677594  | 0.54657743037615 |
| H | 2.11573493559977  | 2.99468990807119  | 0.02860601850710 |
| C | 4.51848501745420  | 2.46381940010449  | 3.11420067371404 |
| H | 4.38393785185592  | 1.45794323517319  | 3.52260536853049 |
| H | -0.05131153168178 | -0.26903303107898 | 4.77726333455130 |
| H | -0.04999982273453 | 0.88787456259044  | 3.44070063940255 |
| H | 3.52639451814456  | 2.91820724781729  | 3.05212825099662 |
| H | 5.11938740261338  | 3.04094769491404  | 3.81701096388467 |
| O | 5.01618312770536  | -2.69646846862918 | 6.34884855790730 |
| N | 2.88463427551319  | -2.99992195131068 | 4.65684091654325 |
| H | 2.17403448897018  | -3.24206462417351 | 3.97432286173683 |
| H | 3.25390316956843  | -2.09481487407462 | 4.37517308385588 |
| C | 4.96713216585455  | -3.69422074522578 | 5.67410374723833 |
| C | 3.94377218108613  | -3.98156823272795 | 4.59777354788451 |

|   |                  |                   |                  |
|---|------------------|-------------------|------------------|
| H | 3.51378951441005 | -4.96132346309274 | 4.84093325865289 |
| H | 6.48384558331370 | -4.45171549331503 | 6.48709455896671 |
| O | 5.84189459557672 | -4.69618626849961 | 5.80280277833027 |
| C | 4.63943089925994 | -4.13867995952886 | 3.23505107720077 |
| S | 5.58908576028905 | -2.67729950898566 | 2.69215918646817 |
| H | 3.87380720851359 | -4.38753885354210 | 2.49827853117162 |
| H | 5.33712600525399 | -4.97682920766685 | 3.28425095313372 |

**[Cu(IMes)<sub>2</sub>]<sup>+</sup>**

Coordinates from ORCA-job

|   |                   |                   |                   |
|---|-------------------|-------------------|-------------------|
| H | 7.43631262783403  | -2.23420571572852 | -2.38706546015006 |
| C | 7.15256026913118  | -1.79210925654343 | -1.43685434762539 |
| C | 4.86497885330446  | -2.77293192733809 | -1.77284985783631 |
| C | 5.85170927205793  | -1.97465593410778 | -0.97781636374656 |
| H | -0.36605475527089 | -5.91674564717089 | 2.17823931098801  |
| C | 0.16991528914989  | -5.10549337826562 | 2.66181895879762  |
| C | 9.49404908116460  | -0.90198923535744 | -1.21618583739022 |
| C | 8.08992359164918  | -1.05990463204147 | -0.71647246190401 |
| C | 0.05245984974191  | -4.93312808631116 | 4.03767082812501  |
| C | -0.82417633898725 | -5.83813189257282 | 4.84918643268888  |
| C | 0.95972273606499  | -4.26895451243235 | 1.88176524432286  |
| C | 1.07798876298692  | -4.48283834562595 | 0.40430762053476  |
| C | 0.75163718950785  | -3.89084587515328 | 4.63633392302469  |
| C | 1.64488032834068  | -3.23660072268619 | 2.52408533781427  |
| C | 3.77608463024600  | -2.62014620385634 | 1.48042697551990  |
| C | 5.50625283137676  | -1.39547231604861 | 0.24295734755592  |
| C | 1.55599484809685  | -3.02691386803170 | 3.89976438396796  |
| C | 7.70091526169099  | -0.49635863724999 | 0.49457941820004  |
| H | 0.67617161769777  | -3.74491359577182 | 5.70958384399736  |
| N | 2.47645740542359  | -2.37021947809235 | 1.74568382514976  |
| N | 4.17451520096251  | -1.56427156211814 | 0.73961197854877  |
| C | 6.41390427636213  | -0.65039155771342 | 0.99705927285609  |
| C | 2.30682437892060  | -1.91923084695782 | 4.57276959194927  |
| C | 2.06734012714685  | -1.18123781343068 | 1.18065050407235  |
| C | 3.14281300839413  | -0.67097805864549 | 0.54293382665650  |

|    |                   |                   |                   |
|----|-------------------|-------------------|-------------------|
| H  | 8.41818356894141  | 0.08248143125755  | 1.06853829217339  |
| H  | 1.06034120964929  | -0.81194135857621 | 1.28083455304633  |
| H  | 3.26625569501898  | 0.23529014926949  | -0.02615364886164 |
| C  | 6.02728370604787  | -0.03942056310249 | 2.30869743286636  |
| H  | 3.38526731207603  | -2.02514603209809 | 4.42527393655858  |
| H  | 2.10600252334754  | -1.91952202007065 | 5.64403840336823  |
| H  | 2.02421347916249  | -0.94218704522466 | 4.17205124329251  |
| H  | -1.87076019748622 | -5.52474607300372 | 4.78187290550140  |
| H  | -0.54194376346679 | -5.82231137872978 | 5.90298368764419  |
| H  | -0.77102061085931 | -6.86743913693911 | 4.48857502084466  |
| H  | 0.42754347140695  | -5.29640159196393 | 0.08311580081245  |
| H  | 2.10491067708178  | -4.73538361614210 | 0.12503063490277  |
| H  | 0.80654267629335  | -3.58346551663029 | -0.15435928065255 |
| H  | 5.19138770523270  | 0.65638499652277  | 2.19853178187029  |
| H  | 6.86891648857441  | 0.50514331198446  | 2.73662622038565  |
| H  | 5.71421653689943  | -0.80435942859941 | 3.02492744387314  |
| H  | 9.54470095880238  | -1.01274604600571 | -2.30052984696134 |
| H  | 10.14657736711272 | -1.66300110831275 | -0.77613718838432 |
| H  | 9.90327233539989  | 0.07281385113827  | -0.94427800630915 |
| H  | 5.30990106761189  | -3.10270228914228 | -2.71167203217642 |
| H  | 3.96891555555316  | -2.19030332100995 | -2.00268460588677 |
| H  | 4.53755780331626  | -3.65767747074222 | -1.21954551209332 |
| Cu | 4.79270432761688  | -4.15972640225607 | 2.00730558192116  |
| H  | 0.79932007229711  | -7.86134198959645 | -1.60259862512273 |
| H  | 8.42663818217324  | -0.44427061073522 | 6.10993547252927  |
| H  | 9.93751368058338  | -0.72440707946833 | 5.23314978096327  |
| C  | 1.42497244154804  | -8.71487402803560 | -1.32214748848698 |
| C  | 9.18859153291900  | -1.19207801253834 | 5.87324685105219  |
| C  | 8.57688659236318  | -2.38793778826069 | 5.20843993359202  |

|   |                  |                   |                   |
|---|------------------|-------------------|-------------------|
| C | 2.52450859495103 | -8.28228049217610 | -0.40032381246830 |
| C | 8.95332321845511 | -2.76487500746133 | 3.92522694173685  |
| H | 9.70367765127872 | -2.18359445754237 | 3.39802338895735  |
| H | 0.77774915490247 | -9.45381545514430 | -0.84698587279015 |
| C | 3.72288773167566 | -7.78781570386215 | -0.90520129909204 |
| H | 7.98728295478012 | -4.14045270222565 | 1.19893420645739  |
| H | 1.82533490330357 | -9.14094149519538 | -2.24395118779484 |
| H | 3.87047074629531 | -7.74158390668691 | -1.97998519267577 |
| C | 2.36413555066477 | -8.34428565800220 | 0.97967514444534  |
| C | 7.61424596046278 | -3.14892343434768 | 5.86690757495361  |
| H | 6.15638980155396 | -5.76523339681091 | -0.40617296029220 |
| C | 5.78885161987222 | -5.70908514704174 | 2.54205846623520  |
| H | 9.63428200367133 | -3.61035990920311 | 1.56532408685967  |
| C | 8.39812946074343 | -3.87262248831546 | 3.29042146884514  |
| H | 1.43792429980948 | -8.73283498822430 | 1.39210979707397  |
| H | 3.25929863773593 | -7.01644567614965 | 3.80587954203449  |
| H | 7.30636909445412 | -2.86934374637847 | 6.87008699647592  |
| C | 8.81756363649669 | -4.24852716411720 | 1.90294667590536  |
| C | 4.74807207501773 | -7.35380438701773 | -0.07204724185318 |
| H | 5.05469791359614 | -5.09575678383757 | 5.44163058476572  |
| H | 6.02986658752274 | -6.93183906289104 | -1.73027410199522 |
| C | 3.35890316766714 | -7.92214672173160 | 1.85567909897648  |
| C | 7.03017922829102 | -4.26254119849105 | 5.27680279621316  |
| C | 6.02642944646610 | -6.82451804256288 | -0.64556921043481 |
| H | 9.66775030976325 | -1.47053129330934 | 6.81566651630617  |
| C | 7.43994655951565 | -4.60644497049835 | 3.98685255256328  |
| C | 4.54195727992015 | -7.42784534874848 | 1.30630836894156  |
| C | 3.15485915003283 | -7.99927632619776 | 3.33765718412092  |
| C | 5.99206276497797 | -5.06055437061832 | 6.00367883139911  |



|   |                  |                   |                   |
|---|------------------|-------------------|-------------------|
| H | 2.16003242252509 | -8.38266661513638 | 3.56468124680421  |
| N | 6.85989768052733 | -5.75595344658387 | 3.36207651503022  |
| N | 5.58507858289211 | -6.99538606314037 | 2.18552587560674  |
| H | 5.79054386960356 | -4.62242463248393 | 6.98110765967500  |
| H | 9.14786509822057 | -5.28905613999316 | 1.85085005487629  |
| H | 6.89560385606043 | -7.35169232087946 | -0.24391741675056 |
| H | 3.88848325757496 | -8.65776554513856 | 3.81034305218032  |
| H | 6.31346806011708 | -6.09483615553690 | 6.15301028208884  |
| C | 7.31955572547745 | -7.04671803637521 | 3.51590419051859  |
| C | 6.51247172028231 | -7.83148360385133 | 2.77025627004026  |
| H | 8.16933509633045 | -7.28563845629482 | 4.13334663672273  |
| H | 6.51462238830015 | -8.89575438353371 | 2.60361325095693  |

**[Cu(IMes)<sub>2</sub>]<sup>+</sup> - ZORA**

Coordinates from ORCA-job

|   |                   |                   |                   |
|---|-------------------|-------------------|-------------------|
| H | 7.43848092440838  | -2.24269062073157 | -2.39006533641108 |
| C | 7.15842251368504  | -1.80450060692875 | -1.43700110479675 |
| C | 4.86748127606757  | -2.77653144214477 | -1.77174749662207 |
| C | 5.85863746583036  | -1.98567020852302 | -0.97537692285228 |
| H | -0.36012610162332 | -5.92337248004917 | 2.19591186159763  |
| C | 0.17992695685212  | -5.11416687805270 | 2.67826292385992  |
| C | 9.50221101782139  | -0.92155512479943 | -1.21834560384570 |
| C | 8.09925665279017  | -1.07791838359840 | -0.71571253245140 |
| C | 0.07000832411926  | -4.94407471031248 | 4.05473438513894  |
| C | -0.80389430254235 | -5.84874297985619 | 4.86903396736236  |
| C | 0.96758259716671  | -4.27788869248207 | 1.89606255105863  |
| C | 1.07676293146225  | -4.48816419676896 | 0.41767750118987  |
| C | 0.77386213836571  | -3.90436342682848 | 4.65201610347434  |
| C | 1.65858156153324  | -3.24899630380069 | 2.53696809961272  |
| C | 3.78740533987948  | -2.63563727060355 | 1.48692005664146  |
| C | 5.51818689498757  | -1.41183257845557 | 0.24914627176183  |
| C | 1.57648274492481  | -3.04121249280540 | 3.91320816805404  |
| C | 7.71518137565703  | -0.51890591452857 | 0.49863593135977  |
| H | 0.70361057275038  | -3.76005107011199 | 5.72578515773463  |
| N | 2.48919180591237  | -2.38356438603740 | 1.75654216664978  |
| N | 4.18713302463135  | -1.57885257374282 | 0.74823716057019  |
| C | 6.42943693214507  | -0.67259094516188 | 1.00403945148991  |
| C | 2.33267143443104  | -1.93645351355240 | 4.58443289951308  |
| C | 2.08226818586720  | -1.19221144779151 | 1.19612021146852  |
| C | 3.15729342291987  | -0.68289943908979 | 0.55722238015687  |

|    |                   |                   |                   |
|----|-------------------|-------------------|-------------------|
| H  | 8.43543017728980  | 0.05557713137539  | 1.07313927760880  |
| H  | 1.07657822454976  | -0.82063116568495 | 1.30022685501824  |
| H  | 3.28167023382212  | 0.22468127460035  | -0.00944970932137 |
| C  | 6.04845172970670  | -0.06731060293841 | 2.31962383410409  |
| H  | 3.41038660609828  | -2.04614112846657 | 4.43452842809804  |
| H  | 2.13438221063545  | -1.93628501551426 | 5.65613452242350  |
| H  | 2.05251872109929  | -0.95841205963060 | 4.18457127143760  |
| H  | -1.84836701022320 | -5.52532724772569 | 4.81868417489470  |
| H  | -0.50797005392721 | -5.84516025661306 | 5.91916811049773  |
| H  | -0.76459955774867 | -6.87495686494923 | 4.49822838978378  |
| H  | 0.42910559115782  | -5.30508790129863 | 0.09954665744275  |
| H  | 2.10309284443021  | -4.73343514452008 | 0.13022071624743  |
| H  | 0.79511639980747  | -3.58943119176767 | -0.13698679146403 |
| H  | 5.21274599153814  | 0.62967888311212  | 2.21607599491765  |
| H  | 6.89227773218841  | 0.47460703773169  | 2.74651863625131  |
| H  | 5.73808980241583  | -0.83521964735889 | 3.03379230601304  |
| H  | 9.54753661092364  | -1.01259032043306 | -2.30476239512392 |
| H  | 10.15039958482163 | -1.69590090752289 | -0.79552172103630 |
| H  | 9.92013122762345  | 0.04473385585648  | -0.93011969041753 |
| H  | 5.30941951783295  | -3.10422244366752 | -2.71265718243604 |
| H  | 3.97354195146152  | -2.18919150854837 | -1.99764544117945 |
| H  | 4.53756802141715  | -3.66214583014398 | -1.22147820814148 |
| Cu | 4.79118130397909  | -4.15936857028931 | 2.00352697303052  |
| H  | 0.78917811813208  | -7.87452730944054 | -1.60898676575791 |
| H  | 8.40111007491088  | -0.41727688892488 | 6.08866803256228  |
| H  | 9.92565375011534  | -0.71473565368458 | 5.24177368715719  |
| C  | 1.42191026389072  | -8.72316955388659 | -1.32969703451939 |
| C  | 9.16158626555548  | -1.17232683610003 | 5.87110310830000  |
| C  | 8.55343075651701  | -2.36806697160620 | 5.20346663217359  |

|   |                  |                   |                   |
|---|------------------|-------------------|-------------------|
| C | 2.51944372141211 | -8.28230598618785 | -0.40982284978956 |
| C | 8.95213520481798 | -2.75768071896258 | 3.93102826843831  |
| H | 9.71698091778669 | -2.18624288521337 | 3.41409916021699  |
| H | 0.78136970946938 | -9.46723088296519 | -0.85357571265672 |
| C | 3.71204079906290 | -7.77674957092420 | -0.91678086505334 |
| H | 8.02241097904449 | -4.16934079818945 | 1.20113130202399  |
| H | 1.82408511041495 | -9.14592450507161 | -2.25219977787923 |
| H | 3.85662903446066 | -7.72741693187989 | -1.99178494233457 |
| C | 2.36257250930580 | -8.34813215841916 | 0.97014688229338  |
| C | 7.57197491872186 | -3.11576313258075 | 5.84879702675634  |
| H | 6.12918459497439 | -5.73535401731393 | -0.42111965722518 |
| C | 5.77667129870587 | -5.69151655221679 | 2.52862864542258  |
| H | 9.65721638502185 | -3.61302030716805 | 1.58298357651804  |
| C | 8.40030207958092 | -3.86555130955440 | 3.29411993485057  |
| H | 1.44058666398011 | -8.74500706943245 | 1.38398351811114  |
| H | 3.25939114142186 | -7.01877434634448 | 3.79683984965600  |
| H | 7.24711647718401 | -2.82605936714066 | 6.84366661550476  |
| C | 8.84356659641520 | -4.25611706647439 | 1.91848073235873  |
| C | 4.73539270025989 | -7.33586405109758 | -0.08535126577617 |
| H | 5.00479017362362 | -5.04230742415623 | 5.39401669687099  |
| H | 6.00977121735933 | -6.90191423452121 | -1.74575044114679 |
| C | 3.35572471014056 | -7.91917949398955 | 1.84430854679821  |
| C | 6.99096016315756 | -4.22929806803582 | 5.25605265890761  |
| C | 6.00780305338324 | -6.79549489946958 | -0.66098208566961 |
| H | 9.62135729397269 | -1.44775937309524 | 6.82398920977246  |
| C | 7.42266452171547 | -4.58587220283899 | 3.97699020322098  |
| C | 4.53308364189176 | -7.41412990478080 | 1.29308686259067  |
| C | 3.15566128669254 | -8.00054562084038 | 3.32637694960063  |
| C | 5.93424261642012 | -5.01469463535004 | 5.96938239973913  |

|   |                  |                   |                   |
|---|------------------|-------------------|-------------------|
| H | 2.16207048824823 | -8.38629190051335 | 3.55465469372893  |
| N | 6.84670033161267 | -5.73617894047157 | 3.35004541833942  |
| N | 5.57545253906492 | -6.97791677368684 | 2.17126038170565  |
| H | 5.72306382935542 | -4.57170481372554 | 6.94252675144332  |
| H | 9.18786899902997 | -5.29297049996900 | 1.88662734344238  |
| H | 6.88216191186869 | -7.31572998832133 | -0.26163145183133 |
| H | 3.89147548799221 | -8.65916571825164 | 3.79540952470997  |
| H | 6.24369012577241 | -6.05154396464877 | 6.12587285040772  |
| C | 7.30818471348977 | -7.02574145322709 | 3.50378942095093  |
| C | 6.50360547162909 | -7.81167537906200 | 2.75704928072833  |
| H | 8.15746151942891 | -7.26309498966300 | 4.12243348470245  |
| H | 6.50770228204591 | -8.87584753944755 | 2.59022993927182  |

**[Cu(IMes)<sub>2</sub>]<sup>+</sup> - D3BJ**

Coordinates from ORCA-job

|   |                   |                   |                   |
|---|-------------------|-------------------|-------------------|
| H | 7.87574873015953  | -2.21577713104791 | -1.68250568522177 |
| C | 7.45199748564500  | -1.74233414825358 | -0.80227641331736 |
| C | 5.24224133482653  | -2.76834534908379 | -1.42113430983163 |
| C | 6.10016245443175  | -1.92410106764994 | -0.53110950615978 |
| H | -0.46316257127049 | -5.96631933221467 | 1.44945038401122  |
| C | 0.09935729824601  | -5.27954835487378 | 2.07389110909065  |
| C | 9.73177768144506  | -0.83585497599035 | -0.26286771558084 |
| C | 8.26880074742101  | -0.97715561167357 | 0.02254560620665  |
| C | 0.04696104690394  | -5.41196487675332 | 3.45830556740744  |
| C | -0.79463438481887 | -6.47928076330666 | 4.08720568565689  |
| C | 0.87818459935660  | -4.30735691751821 | 1.46148596971008  |
| C | 0.97215165532911  | -4.21857404270296 | -0.02932461977628 |
| C | 0.79600671293857  | -4.53908746978397 | 4.23833344224048  |
| C | 1.60548599052508  | -3.44625600280971 | 2.28262458612327  |
| C | 3.77122808642506  | -2.65441407718956 | 1.51558049341010  |
| C | 5.57971990868923  | -1.30912540072740 | 0.60598597531437  |
| C | 1.58465680725140  | -3.54278381512932 | 3.67179574399195  |
| C | 7.70544082285361  | -0.37728774196261 | 1.14403430142194  |
| H | 0.77502861708735  | -4.63800662793016 | 5.31909166891347  |
| N | 2.44823636072468  | -2.46420477338800 | 1.67827274870388  |
| N | 4.20561848568981  | -1.51998319616446 | 0.93307361236241  |
| C | 6.36297621474350  | -0.53632170184569 | 1.46235517622039  |
| C | 2.40633120785366  | -2.62806604326163 | 4.52555195983761  |
| C | 2.05510941147497  | -1.22952489532068 | 1.20564353947272  |
| C | 3.17095785150550  | -0.63044539051324 | 0.73170645225943  |

|    |                   |                   |                   |
|----|-------------------|-------------------|-------------------|
| H  | 8.33181428161428  | 0.21445410492004  | 1.80402504301002  |
| H  | 1.03218655366395  | -0.89517907161562 | 1.24769065413621  |
| H  | 3.32041060906072  | 0.33387147939021  | 0.27613155675147  |
| C  | 5.78786163341392  | 0.07290733045590  | 2.70262218670787  |
| H  | 3.47425742923029  | -2.79260150895747 | 4.35438472298368  |
| H  | 2.19849579393287  | -2.80021135981816 | 5.58130150727970  |
| H  | 2.20660607331122  | -1.57839644667287 | 4.29645048073170  |
| H  | -1.85861649163432 | -6.24275820801817 | 3.99317241775973  |
| H  | -0.56677776093274 | -6.58813737163376 | 5.14821474726615  |
| H  | -0.63442780006318 | -7.44257151560580 | 3.59716794408185  |
| H  | 0.34568611071506  | -4.97818274722820 | -0.49645142078999 |
| H  | 2.00300595965277  | -4.37129859368603 | -0.36222047266677 |
| H  | 0.65872680510524  | -3.23847452307586 | -0.39704243655923 |
| H  | 5.02614177199051  | 0.82100711902690  | 2.46848945708308  |
| H  | 6.57123416247145  | 0.55399189092512  | 3.28781360895797  |
| H  | 5.30989107871421  | -0.68809615779569 | 3.32561390634376  |
| H  | 9.94882491921172  | -1.00549445698659 | -1.31852638055203 |
| H  | 10.30543403800056 | -1.56821568656923 | 0.31435587023053  |
| H  | 10.09628906582637 | 0.15447033886857  | 0.01621351530842  |
| H  | 5.78777099554033  | -3.05276848353422 | -2.32068556681965 |
| H  | 4.33136264028320  | -2.24168550210256 | -1.71578080939748 |
| H  | 4.92871063890217  | -3.68205977119095 | -0.90719699196549 |
| Cu | 4.79344145933859  | -4.18460503900753 | 1.99946750181765  |
| H  | 0.23962220807343  | -7.55992094861594 | -0.73951916085577 |
| H  | 8.56311877777309  | -0.03929841298915 | 4.91860305569977  |
| H  | 10.12177014424640 | -0.50543916456595 | 4.22529425501075  |
| C  | 0.85620609944897  | -8.45562683914911 | -0.61165973351686 |
| C  | 9.32593544289195  | -0.82272597630372 | 4.90005823953065  |
| C  | 8.73484299425076  | -2.12833216189687 | 4.46540306549965  |

|   |                  |                   |                   |
|---|------------------|-------------------|-------------------|
| C | 2.10672152682448 | -8.12271462551827 | 0.14236308769840  |
| C | 9.17622518462795 | -2.76242111391978 | 3.31132904273386  |
| H | 9.96244220921811 | -2.30584322661814 | 2.71920951137608  |
| H | 0.25373182542935 | -9.19111156065358 | -0.07560572510262 |
| C | 3.27548080039419 | -7.78213598400825 | -0.53041987613958 |
| H | 8.22768833444645 | -4.69337414071110 | 0.89545455130120  |
| H | 1.08228902202220 | -8.84390323946383 | -1.60589113653491 |
| H | 3.28873850104609 | -7.79094258255403 | -1.61588571046737 |
| C | 2.11138712329852 | -8.10961537307705 | 1.53299400183959  |
| C | 7.71310442236781 | -2.72188725529166 | 5.20246800501911  |
| H | 5.92207144270046 | -5.98808976175358 | -0.41905558790904 |
| C | 5.82094197858760 | -5.70628618217215 | 2.49666334225125  |
| H | 9.83747841447905 | -3.99177429783818 | 1.11860906055163  |
| C | 8.61678959152845 | -3.95809975589877 | 2.87194273309868  |
| H | 1.20625682163360 | -8.37037358521639 | 2.07161760680174  |
| H | 3.47016908761543 | -6.69000032428543 | 4.10840915377811  |
| H | 7.35397272145472 | -2.23680768680938 | 6.10493329892879  |
| C | 9.06389337964619 | -4.59486286156013 | 1.59332592875578  |
| C | 4.43398643171213 | -7.42550982659239 | 0.15056609197562  |
| H | 5.10850200144281 | -4.60789876856795 | 5.01829432294452  |
| H | 5.55093522992678 | -7.19617820841263 | -1.65854341822215 |
| C | 3.24103438643756 | -7.75099534811330 | 2.25789969961942  |
| C | 7.13218168020507 | -3.92090384108978 | 4.81197332600877  |
| C | 5.67817853441011 | -7.04127555445581 | -0.58739462311962 |
| H | 9.73878007996630 | -0.89403352784185 | 5.90970822014331  |
| C | 7.60239733090702 | -4.51893143457776 | 3.64224106276995  |
| C | 4.39023242770476 | -7.41892156768445 | 1.54320913975943  |
| C | 3.21401286290758 | -7.69197730093648 | 3.75295864714246  |
| C | 6.02693388928790 | -4.54100808725969 | 5.60808586004786  |



|   |                  |                   |                   |
|---|------------------|-------------------|-------------------|
| H | 2.22168647585790 | -7.94305103910985 | 4.12653816107839  |
| N | 6.97607297823138 | -5.72025189157549 | 3.18949709396021  |
| N | 5.55202383814908 | -7.00449341410526 | 2.26331451070480  |
| H | 5.81931466398254 | -3.95049455201902 | 6.50016827976610  |
| H | 9.46233132977803 | -5.59870889551165 | 1.75998404473672  |
| H | 6.53913557089386 | -7.62417104864804 | -0.25139084905660 |
| H | 3.93488336130182 | -8.38332794606544 | 4.19699916093488  |
| H | 6.28151152484133 | -5.55825900787091 | 5.91715442045065  |
| C | 7.42591814067064 | -7.00836997757240 | 3.39073776132272  |
| C | 6.52149359715345 | -7.82410198189673 | 2.80236955208684  |
| H | 8.33490386340385 | -7.22394901744168 | 3.92664407435282  |
| H | 6.48013922403526 | -8.89704681477310 | 2.71882763707721  |

### **[CuCl<sub>2</sub>]<sup>-</sup>**

Coordinates from ORCA-job

|    |                   |                  |                   |
|----|-------------------|------------------|-------------------|
| Cu | -3.54983717975127 | 2.02441716106685 | -0.00006866322912 |
| Cl | -5.69015015349822 | 1.98027048915220 | 0.00004041848680  |
| Cl | -1.40949266675050 | 2.06837234978094 | 0.00002824474232  |

### **[CuCl<sub>2</sub>]<sup>-</sup> - ZORA**

Coordinates from ORCA-job

|    |                   |                  |                   |
|----|-------------------|------------------|-------------------|
| Cu | -3.54980611211791 | 2.02437856532145 | -0.00003169996541 |
| Cl | -5.66681632700999 | 1.98049465937340 | 0.00000994852657  |
| Cl | -1.43285756087210 | 2.06818677530515 | 0.00002175143884  |

### **[CuCl<sub>2</sub>]<sup>-</sup> - D3BJ**

Coordinates from ORCA-job

|    |                   |                  |                   |
|----|-------------------|------------------|-------------------|
| Cu | -3.54983619439439 | 2.02441614692252 | -0.00006760665869 |
| Cl | -5.69003157939371 | 1.98027344676261 | 0.00003988988613  |
| Cl | -1.40961222621189 | 2.06837040631486 | 0.00002771677256  |

**[Au(IMes)Cl]**

Coordinates from ORCA-job

|    |                   |                   |                   |
|----|-------------------|-------------------|-------------------|
| H  | 6.80634604880788  | 2.10716850136532  | -1.09586984630956 |
| C  | 6.15989865027997  | 2.12390901503212  | -0.22384171642987 |
| Cl | 4.70644264610742  | -3.47014408776745 | 1.98556437842777  |
| C  | 4.37503120485235  | 1.06287502907177  | -1.63918365872633 |
| C  | 4.86619073463427  | 1.62565833658130  | -0.34139890404944 |
| Au | 3.43423852033526  | -1.63454103740819 | 1.44675462777431  |
| H  | -1.18876440373969 | -3.84594408915124 | -0.61076221109309 |
| C  | -0.96727109984717 | -3.16010079946328 | 0.20087947689363  |
| C  | 8.04785876227109  | 3.14765702117258  | 1.08198793716661  |
| C  | 6.64184806470375  | 2.64091975507589  | 0.97309015490890  |
| C  | -1.50880349586143 | -3.39430966515906 | 1.45902050896321  |
| C  | -2.37717927622075 | -4.58790609351112 | 1.71691137503330  |
| C  | -0.14232585049052 | -2.06827178262603 | -0.05313732003726 |
| C  | 0.43982127966802  | -1.84641017231117 | -1.41469491293556 |
| C  | -1.21732031272175 | -2.49915861533657 | 2.48472061273582  |
| C  | 0.12894312544372  | -1.20395567053207 | 1.00475088291125  |
| C  | 2.31363211976852  | -0.07749736370765 | 0.95436428129022  |
| C  | 4.05330421503746  | 1.66237581769356  | 0.78981048579742  |
| C  | -0.40199125904310 | -1.39402959961936 | 2.28210140271340  |
| C  | 5.79379786803260  | 2.66119325281475  | 2.07640464946681  |
| H  | -1.63496703032771 | -2.66397254486400 | 3.47338800298285  |
| N  | 0.97636695711437  | -0.07193199718299 | 0.78050797328420  |
| N  | 2.70680024662923  | 1.18533907087126  | 0.69381489280578  |
| C  | 4.49269855839264  | 2.17879744309032  | 2.00979927823484  |
| C  | -0.10337405728465 | -0.44498033947755 | 3.40097488992173  |

|   |                   |                   |                   |
|---|-------------------|-------------------|-------------------|
| C | 0.53580255632504  | 1.18089056190640  | 0.41180532824707  |
| C | 1.62614533502228  | 1.97344038094743  | 0.35737405491261  |
| H | 6.15070857254586  | 3.06921030861128  | 3.01702945785533  |
| H | -0.50434362568546 | 1.38917262272049  | 0.22590484279410  |
| H | 1.73454523530418  | 3.01692561234938  | 0.11378845591286  |
| C | 3.59767172187446  | 2.21675307718887  | 3.20972403577176  |
| H | 0.97326042646553  | -0.34929336534956 | 3.56426947878648  |
| H | -0.56233829819249 | -0.79141621901094 | 4.32672688438879  |
| H | -0.48504551880690 | 0.55679939569448  | 3.18567293192756  |
| H | -2.61684011912588 | -5.11076749173649 | 0.79039625947894  |
| H | -3.31206616789859 | -4.29742186560861 | 2.20256847054324  |
| H | -1.87539087844308 | -5.29491131302822 | 2.38404794242768  |
| H | 0.07381205509648  | -2.59913416119638 | -2.11274209956056 |
| H | 1.53181581215419  | -1.90490109218544 | -1.38895707987393 |
| H | 0.18077429537572  | -0.85931152031044 | -1.80602196235983 |
| H | 2.70089009620151  | 2.81332537904833  | 3.02125644940471  |
| H | 4.12165902811349  | 2.64913347161213  | 4.06192307657641  |
| H | 3.26176781961420  | 1.21349179301604  | 3.48537170917340  |
| H | 8.46362733430860  | 3.37716658127720  | 0.09985212666235  |
| H | 8.69325805775934  | 2.39675324223139  | 1.54844775788151  |
| H | 8.09786582483947  | 4.04559334929719  | 1.70113140902132  |
| H | 5.12943908327849  | 1.18317312217958  | -2.41649358770725 |
| H | 3.45742665452226  | 1.55536214046956  | -1.97080661020343 |
| H | 4.14972248280931  | -0.00344339477480 | -1.54299657379215 |

**[Au(IMes)DMSO]<sup>+</sup>**

Coordinates from ORCA-job

|    |                    |                   |                   |
|----|--------------------|-------------------|-------------------|
| H  | -2.29160028672319  | -5.99897593087884 | 1.98328506766177  |
| H  | -0.32130863408679  | -4.80648624477147 | 1.67794045522838  |
| H  | 1.64143824448896   | -3.05930570805217 | 1.81581014176764  |
| C  | -2.97020460854134  | -5.29031606830444 | 1.50885213663469  |
| H  | -3.67414452112365  | -4.93470010848119 | 2.26705705814728  |
| C  | -0.82936516554265  | -4.04660260378968 | 1.09202655390777  |
| C  | 1.38553651917251   | -2.91089317835069 | 0.76409902877986  |
| H  | -3.55434746555034  | -5.82428026071344 | 0.75521722110191  |
| C  | -2.20195241223123  | -4.15434453725684 | 0.90764935854117  |
| H  | 1.77710339501656   | -1.94396093432127 | 0.44585024877968  |
| H  | -6.73718226310163  | -4.43269114242354 | 2.74801847295654  |
| C  | -0.09531065797606  | -2.99400418757891 | 0.55226498128206  |
| H  | -8.36863443630971  | -5.10116866285788 | 2.88207380369598  |
| C  | -7.67500501535192  | -4.59697187836619 | 2.20948203182398  |
| H  | 1.90321689475711   | -3.68825846427215 | 0.19442943964510  |
| C  | -2.83295090268201  | -3.16103380532110 | 0.15750535264362  |
| H  | -10.00247169672219 | -3.45831178658848 | 2.95671974861815  |
| H  | -7.45373752620633  | -5.26938280889804 | 1.37680027453554  |
| C  | -0.76536021943171  | -2.03248674907502 | -0.19462812273504 |
| C  | -8.26151513808459  | -3.30529096275342 | 1.73082599600666  |
| C  | -9.48248165002242  | -2.85450788600771 | 2.21926993724838  |
| N  | -4.25134665902273  | -3.23308578781016 | -0.03559964823315 |
| C  | -5.15468567533364  | -2.70016904056209 | 0.80666055348207  |
| Au | -4.72725744887843  | -1.80295622248204 | 2.55492775335573  |
| C  | -4.87957884837538  | -3.81601805487012 | -1.11262990306265 |

|   |                    |                   |                   |
|---|--------------------|-------------------|-------------------|
| C | -2.13858476778564  | -2.09385423439226 | -0.40934078650826 |
| N | -6.35470075125581  | -2.94735818139520 | 0.25319445099875  |
| C | -6.20574443917629  | -3.63538707968851 | -0.93082658543405 |
| C | -7.61077128720426  | -2.51012625955702 | 0.78774937855481  |
| S | -4.11581761139537  | -0.88499539839355 | 4.56841141819397  |
| H | -4.33000862529685  | -4.30050169554091 | -1.90206845359453 |
| H | -11.51763521756675 | -0.14090532369997 | 2.19300933910095  |
| H | -0.20786373161266  | -1.20500431947951 | -0.62215792775212 |
| C | -10.05164270606857 | -1.66035354211939 | 1.78833166201301  |
| H | -12.19422438872242 | -1.71203132439537 | 1.76439569816465  |
| C | -11.38442159184954 | -1.21734798230998 | 2.30994380453164  |
| H | -7.05083210689436  | -3.93005500596573 | -1.52996803727693 |
| C | -8.14259275511438  | -1.30670196329337 | 0.32612912453805  |
| C | -9.36703932798759  | -0.90138483016825 | 0.84570014176720  |
| C | -2.83601865064826  | -1.03924461949053 | -1.21185611674148 |
| H | -7.98573330125097  | 0.44371621282353  | -0.88998658450909 |
| H | -2.11962695788891  | -0.30127134623132 | -1.57204928915251 |
| C | -7.42742993807979  | -0.47047916490032 | -0.68961059651362 |
| H | -9.79442912372196  | 0.03567266978458  | 0.50244710492924  |
| H | -11.50139045693526 | -1.47276606266864 | 3.36484159597501  |
| H | -3.34889590876528  | -1.46752338312865 | -2.07697487704043 |
| H | -6.42712707414918  | -0.19400771061589 | -0.34562134479193 |
| H | -3.59185704673731  | -0.52021513621712 | -0.61579917979654 |
| H | -7.30445436587523  | -1.00716336964703 | -1.63417862882756 |
| C | -5.53866537347118  | -0.35213659744060 | 5.47801582183352  |
| H | -5.18464766513007  | 0.14018690079666  | 6.38528310404489  |
| H | -6.12239749608158  | -1.24110533667988 | 5.71369615767729  |
| H | -6.11332138699908  | 0.33064504750474  | 4.85096727752910  |
| C | -3.28740080829266  | 0.65529740405382  | 4.28864077772353  |

|   |                   |                   |                  |
|---|-------------------|-------------------|------------------|
| H | -2.37549622345319 | 0.43188698792061  | 3.73605584028607 |
| H | -3.06165871218707 | 1.09418561416730  | 5.26184266651539 |
| H | -3.94386120777614 | 1.29867367328288  | 3.70151532909673 |
| O | -3.27876281676119 | -1.74211162812738 | 5.42451977265166 |

**[Au(IMes)Cys]**

Coordinates from ORCA-job

|    |                   |                   |                   |
|----|-------------------|-------------------|-------------------|
| H  | 5.26266613998771  | 0.89221836280298  | -2.52017724495390 |
| H  | 4.26221680786911  | -0.05286969966485 | -1.40603410775788 |
| C  | 4.56503055212494  | 0.95988263683614  | -1.68556026861988 |
| H  | 7.02934489654126  | 2.05566841200429  | -1.56396648721170 |
| H  | 2.09748795633549  | -1.84776666248975 | -0.87270412939873 |
| H  | 0.71373919161371  | -2.78423813486614 | -1.45708226896465 |
| C  | 1.00705643854346  | -1.92602850556062 | -0.85267156539591 |
| H  | 3.66732485610694  | 1.47851966304618  | -2.03274479276423 |
| Au | 4.14762883364737  | -1.29040428848074 | 1.93543008708123  |
| H  | -0.46249761724324 | -3.94416899819658 | 0.17195979237106  |
| C  | 6.48869416195948  | 2.18363838725840  | -0.63128420238520 |
| C  | 5.19770048281599  | 1.67362977055853  | -0.53141977473509 |
| C  | -0.25168716682989 | -3.18428052824656 | 0.91833609086684  |
| C  | 0.49927624639042  | -2.07484614560890 | 0.54811254096140  |
| H  | 8.88514035910651  | 3.22710846651141  | -0.70815600014735 |
| H  | -1.24636643003199 | -5.42600942983883 | 2.02735724757171  |
| H  | 0.61230148012020  | -1.02341872494927 | -1.32683299591036 |
| H  | -1.51195752299976 | -4.74884577608932 | 3.64512368592890  |
| C  | -1.56629623976539 | -4.53804495193969 | 2.57590763272402  |
| C  | 2.88040579302064  | 0.11007625157142  | 1.25191334055061  |
| C  | -0.73391530102913 | -3.34604139315299 | 2.21329928015462  |
| C  | 8.49359066393670  | 3.38247782846642  | 0.29774050442101  |
| C  | 7.09951041750109  | 2.84727901752266  | 0.42548399833887  |
| C  | 0.76565539716086  | -1.11537684977732 | 1.52557230262563  |
| C  | 4.52241225064550  | 1.84890598160067  | 0.67443077715711  |



|   |                   |                   |                  |
|---|-------------------|-------------------|------------------|
| H | 9.16703623921337  | 2.89049770773819  | 1.00510932739167 |
| N | 1.53638560605741  | 0.03606568500652  | 1.16649154173177 |
| N | 3.18961939219989  | 1.34090654130718  | 0.79444691968284 |
| C | -0.44510932226049 | -2.36495970265146 | 3.15540108885260 |
| C | 0.30331015096789  | -1.23685113849026 | 2.83517622135312 |
| C | 6.38668441326043  | 3.00231530576264  | 1.61136218638307 |
| C | 5.09508074778233  | 2.51320485977808  | 1.76044303448252 |
| H | -2.61780698496389 | -4.36303149243087 | 2.32731335878370 |
| C | 2.05220903707236  | 2.03013543407005  | 0.42836986156498 |
| H | 8.52457176621354  | 4.45293982773125  | 0.51721116854849 |
| C | 1.00937606306132  | 1.20738562684302  | 0.66307873304336 |
| H | -0.80722398182365 | -2.47886319803112 | 4.17260960074891 |
| H | 1.68752592812220  | -0.09829621512776 | 4.01992951632989 |
| C | 0.60892175104827  | -0.19966369200705 | 3.87076359910809 |
| H | 6.84729741354278  | 3.52006800194964  | 2.44739987376864 |
| H | -0.04940059238358 | 1.34419673804158  | 0.52097446600601 |
| H | 2.09125219728811  | 3.03325959307310  | 0.03809880689896 |
| C | 4.34833650531913  | 2.69329197632755  | 3.04543187532051 |
| H | 4.07262777867746  | 1.72876463247176  | 3.48072274936562 |
| H | 0.15499075851693  | -0.46822077482422 | 4.82452225347944 |
| H | 0.23216678170490  | 0.78360777123026  | 3.57695277689356 |
| H | 3.42139570559964  | 3.25287093506485  | 2.89341734574488 |
| H | 4.95906723414033  | 3.23419907314629  | 3.76811929768310 |
| O | 5.23963871223425  | -2.55511532089413 | 6.33198742586769 |
| N | 3.02975892618403  | -3.05282588276351 | 4.80528167601709 |
| H | 2.31353562793826  | -3.33444377149784 | 4.14408378345977 |
| H | 3.35614260069887  | -2.14004269406253 | 4.49857840789829 |
| C | 5.19278237539793  | -3.60065232219680 | 5.73447622561226 |
| C | 4.11968990588160  | -3.99962764536010 | 4.74661299494671 |

|   |                  |                   |                  |
|---|------------------|-------------------|------------------|
| H | 3.74164463753678 | -4.97359182719072 | 5.08221595486705 |
| H | 6.78733340390579 | -4.24156907809300 | 6.49740294736523 |
| O | 6.11391926298037 | -4.55754798913415 | 5.87506750201503 |
| C | 4.74043274650466 | -4.23809952603964 | 3.36009198148164 |
| S | 5.67622824074007 | -2.83229938609635 | 2.67327158865234 |
| H | 3.94150413484127 | -4.53036392382452 | 2.67728540952537 |
| H | 5.44633218926965 | -5.06860881814300 | 3.42178505661663 |

**[Au(IMes)<sub>2</sub>]<sup>+</sup>**

Coordinates from ORCA-job

|   |                   |                   |                   |
|---|-------------------|-------------------|-------------------|
| H | 7.49367141733352  | -2.06669373648359 | -2.27422252630100 |
| C | 7.17027569506595  | -1.64495666469181 | -1.32756294491577 |
| C | 4.90983632152361  | -2.64725919970399 | -1.76356655594167 |
| C | 5.85631083000755  | -1.85055541519119 | -0.92015861805795 |
| H | -0.50120424781668 | -5.87289479149609 | 1.90761115384048  |
| C | 0.03319985631992  | -5.08705649577370 | 2.43284512443921  |
| C | 9.49094634804522  | -0.73605507863146 | -1.00611292508740 |
| C | 8.07199110170890  | -0.91635721999672 | -0.55983236262929 |
| C | -0.11606710703685 | -4.96136709937705 | 3.81040830254407  |
| C | -1.02552184121874 | -5.88100897559277 | 4.56679821492637  |
| C | 0.85479671999987  | -4.23645831093258 | 1.70290508713146  |
| C | 1.01194983182459  | -4.40413652314611 | 0.22350125371153  |
| C | 0.58332990980036  | -3.95251921218363 | 4.46340293030402  |
| C | 1.53562267590560  | -3.23735944852484 | 2.39906373679649  |
| C | 3.70028585538540  | -2.56064343440887 | 1.45254448454486  |
| C | 5.46193128963876  | -1.29790970032867 | 0.29757478280685  |
| C | 1.41603463497682  | -3.07399886199407 | 3.77827599247034  |
| C | 7.63293575632333  | -0.37765156115656 | 0.64537502072886  |
| H | 0.48373004612832  | -3.84390739084191 | 5.53900060671184  |
| N | 2.38820476360036  | -2.34699677798114 | 1.67045405948168  |
| N | 4.11497926430453  | -1.49272747310333 | 0.74341697744410  |
| C | 6.33058585850529  | -0.55465136630904 | 1.09710158714147  |
| C | 2.16321676622806  | -2.00064322891223 | 4.50752363693414  |
| C | 1.98374232511613  | -1.15758697436594 | 1.10394142627952  |
| C | 3.07393137782456  | -0.61850331168211 | 0.51791120016398  |

|    |                   |                   |                   |
|----|-------------------|-------------------|-------------------|
| H  | 8.32175900612436  | 0.19869121742583  | 1.25543738235695  |
| H  | 0.96675877258226  | -0.80871469093389 | 1.16848518600535  |
| H  | 3.20387942612884  | 0.29758573737973  | -0.03336706014620 |
| C  | 5.88698453611357  | 0.03056064337553  | 2.40195635164133  |
| H  | 3.24405980244514  | -2.12564457841935 | 4.39728652158633  |
| H  | 1.92290733985242  | -2.02522330883118 | 5.57026578658688  |
| H  | 1.91484094404465  | -1.00778789812476 | 4.12331387820637  |
| H  | -2.06414780325213 | -5.54369136929836 | 4.49281978660012  |
| H  | -0.76390174358414 | -5.91423547777525 | 5.62546334277190  |
| H  | -0.98523812527157 | -6.89527434723723 | 4.16462000772248  |
| H  | 0.35966704712294  | -5.19730996770946 | -0.14163962655259 |
| H  | 2.04257400197368  | -4.66371732053369 | -0.03539761821197 |
| H  | 0.76852913353577  | -3.48417683420537 | -0.31399452818073 |
| H  | 5.07597486923221  | 0.75075221599733  | 2.26411616055553  |
| H  | 6.71655548751961  | 0.54218786486312  | 2.88973721235389  |
| H  | 5.51606461876063  | -0.74400098106088 | 3.07876795229711  |
| H  | 9.58106994877056  | -0.83233989809989 | -2.08918874641314 |
| H  | 10.13592777598709 | -1.49565872762104 | -0.55280839902596 |
| H  | 9.87910778257682  | 0.23954030527556  | -0.70762469786952 |
| H  | 5.38697959327306  | -2.93775257382616 | -2.69941949178332 |
| H  | 4.00595834022287  | -2.07974671585423 | -1.99995900651154 |
| H  | 4.59089327796018  | -3.55665078853673 | -1.24610486650352 |
| Au | 4.79562278642279  | -4.15894900049559 | 2.02542234065425  |
| H  | 0.69655003668718  | -7.87807201030068 | -1.32562762083726 |
| H  | 8.70432216454564  | -0.47508450406451 | 5.95624227782120  |
| H  | 10.20370871590848 | -0.81723226772780 | 5.08231190902456  |
| C  | 1.30425784283038  | -8.74543398416616 | -1.04819340438617 |
| C  | 9.44475093685682  | -1.24900166072267 | 5.73559074202304  |
| C  | 8.79776961505555  | -2.44240020727209 | 5.10136507214961  |

|   |                  |                   |                   |
|---|------------------|-------------------|-------------------|
| C | 2.45398964600815 | -8.32679477263349 | -0.18366192710469 |
| C | 9.14196680399454 | -2.84476708198609 | 3.81709540264290  |
| H | 9.89245850857144 | -2.28589428102840 | 3.26663703476876  |
| H | 0.65278426460931 | -9.44929833579969 | -0.52779544628133 |
| C | 3.64870897096416 | -7.89464804217157 | -0.75035885185875 |
| H | 8.09399649896432 | -4.22451539244596 | 1.12923201893531  |
| H | 1.65218179225672 | -9.20822760013388 | -1.97344127981845 |
| H | 3.75536791057049 | -7.88829106748186 | -1.83085961528566 |
| C | 2.34470936850847 | -8.33883039633349 | 1.20252728153530  |
| C | 7.83355578486118 | -3.17409069490224 | 5.78993180677080  |
| H | 6.16655914565765 | -5.94390422128652 | -0.40939815251376 |
| C | 5.88033917455733 | -5.77272347768650 | 2.57363069591559  |
| H | 9.76196714853807 | -3.73793961628964 | 1.45922209682480  |
| C | 8.55296447006893 | -3.94974639740070 | 3.20915643589013  |
| H | 1.42202833393478 | -8.67995209276328 | 1.66193765677255  |
| H | 3.42379294938942 | -6.95298961886350 | 3.94464173563341  |
| H | 7.55109490230528 | -2.87401810799829 | 6.79457673197566  |
| C | 8.93463223664130 | -4.35023007218717 | 1.81801110448136  |
| C | 4.71991846902483 | -7.47140437058034 | 0.02771286687301  |
| H | 5.23022899342951 | -5.07520680098851 | 5.44482154597423  |
| H | 5.94846421250351 | -7.14416063784687 | -1.69043608110886 |
| C | 3.38609818413459 | -7.92392755834228 | 2.02547350931263  |
| C | 7.21748798944179 | -4.28458735176384 | 5.22831416920198  |
| C | 5.99173484662845 | -7.00490153834396 | -0.61035498336140 |
| H | 9.91907203533824 | -1.51816464405044 | 6.68298866524608  |
| C | 7.59541775604814 | -4.65342414415475 | 3.93597459426129  |
| C | 4.56220111294055 | -7.49094475177137 | 1.41380661743806  |
| C | 3.23858518621670 | -7.94133849818636 | 3.51563075713527  |
| C | 6.17997699012836 | -5.05320514236786 | 5.98619629021008  |

|   |                  |                   |                   |
|---|------------------|-------------------|-------------------|
| H | 2.23249395125578 | -8.25401775866512 | 3.79451501244427  |
| N | 6.98474657389462 | -5.80557218896608 | 3.34401407407839  |
| N | 5.64959302242339 | -7.05754275791208 | 2.23867206751146  |
| H | 6.00817280460979 | -4.60024764728492 | 6.96242148337459  |
| H | 9.23593996584200 | -5.39954159073101 | 1.76879954006121  |
| H | 6.85784709640971 | -7.55024195061262 | -0.22704859559391 |
| H | 3.94925505659525 | -8.63023175988228 | 3.98040934786297  |
| H | 6.48441770043754 | -6.09194344043026 | 6.14018713469077  |
| C | 7.44147595679434 | -7.09755454231870 | 3.49231268093056  |
| C | 6.59891472298714 | -7.88779168968907 | 2.79366163512790  |
| H | 8.31619818441267 | -7.33219535809121 | 4.07531488222588  |
| H | 6.58793969818111 | -8.95391322631825 | 2.64086156741629  |

**[AuCl<sub>2</sub>]<sup>-</sup>**

Coordinates from ORCA-job

|    |                   |                  |                   |
|----|-------------------|------------------|-------------------|
| Au | -3.54983844504653 | 2.02446446148997 | 0.00009821713191  |
| Cl | -5.82566256341151 | 1.97858524426328 | 0.00334243047787  |
| Cl | -1.27397899154194 | 2.07001029424675 | -0.00344064760978 |

## DMSO

Coordinates from ORCA-job

|   |                   |                   |                  |
|---|-------------------|-------------------|------------------|
| S | -4.12771042281068 | -0.93306982428853 | 4.50591855907150 |
| C | -5.51578965962075 | -0.34369576089182 | 5.46907880904772 |
| H | -5.14627710787574 | 0.16414891159649  | 6.36162325182897 |
| H | -6.11303002008043 | -1.21446843271472 | 5.73944323494394 |
| H | -6.10734404534004 | 0.33345987951150  | 4.85053165318950 |
| C | -3.30818476651967 | 0.64365567684580  | 4.29976033795382 |
| H | -2.37429958000512 | 0.45202953408370  | 3.77140529954227 |
| H | -3.11347048183938 | 1.08016879910753  | 5.28090925657881 |
| H | -3.94644108388519 | 1.29537522727939  | 3.70088780444738 |
| O | -3.26949283202299 | -1.74707401052934 | 5.42940179339606 |



## Cys

Coordinates from ORCA-job

|   |                   |                   |                   |
|---|-------------------|-------------------|-------------------|
| H | 2.21694735285129  | -3.03584660448594 | 9.47349953449256  |
| S | 0.31730812362329  | -1.33141562721508 | 10.26669999356017 |
| N | 1.92639254164557  | -3.69395703087810 | 8.75068371091014  |
| O | 2.17389473037938  | -1.56094968735916 | 7.02328544085301  |
| C | 1.07962961060709  | -2.04062673599307 | 7.18914793989680  |
| H | 1.67047664171776  | -4.54309555300504 | 9.24396028680115  |
| O | 0.01050088794122  | -1.63514050327707 | 6.49195226890945  |
| H | 0.29315242524699  | -0.92180204233323 | 5.89969103244154  |
| C | 0.72323955233431  | -3.14652167287016 | 8.15649227276115  |
| C | -0.31618635732042 | -2.64622881449330 | 9.17576575459020  |
| H | -0.61704376486442 | -3.51724127764487 | 9.76700684405944  |
| H | -1.20265687363601 | -2.30273654251983 | 8.63702964567619  |
| H | 0.24884512947391  | -3.93013790792513 | 7.55208527504808  |

**[Cu(IMes)Cl] - DMSO AR**

Coordinates from ORCA-job

|    |                  |                   |                   |
|----|------------------|-------------------|-------------------|
| Cl | 6.14805107145322 | -2.22933317443538 | 1.67601267466069  |
| Cu | 4.40995831276490 | -1.03917620937599 | 1.27432248547241  |
| H  | 4.23094863863888 | 0.60737718391501  | -1.66323155085264 |
| C  | 4.13814578929822 | 1.69322878139051  | -1.75590618093761 |
| C  | 2.87690872149408 | 0.03279712440163  | 0.96122996302228  |
| H  | 2.39905569797629 | -1.24263183323171 | 3.63012626684712  |
| H  | 4.71845417791024 | 2.01256739125796  | -2.62153436864853 |
| C  | 4.62192611249666 | 2.38345538913079  | -0.51778398040332 |
| H  | 2.04888139870337 | -1.45290596475517 | -1.60298760970200 |
| C  | 5.73557077107052 | 3.21328297191959  | -0.55574310150053 |
| C  | 3.97726065361672 | 2.21429517000147  | 0.70921919495163  |
| H  | 3.08415895677734 | 1.90817377563386  | -1.94953459783587 |
| C  | 1.15871532958363 | -1.71897537226485 | 1.06111706740820  |
| C  | 1.33088661974968 | -1.47146571132693 | 3.56817172276964  |
| H  | 3.68271928400538 | 1.59841119384795  | 3.46163020620726  |
| C  | 1.02449763694283 | -2.26747843100838 | 2.33700102332028  |
| H  | 6.24544844021248 | 3.35829724392548  | -1.50360453510583 |
| N  | 1.58527159990995 | -0.36002534982503 | 0.92839965971707  |
| N  | 2.82459486180787 | 1.36870223415903  | 0.77074011890849  |
| C  | 0.88294985112206 | -2.44900544279420 | -0.09509951790784 |
| H  | 1.04956082593840 | -2.02883192230824 | 4.46171028860572  |
| C  | 0.60297480865089 | -3.58925966719401 | 2.43273654706184  |
| H  | 0.76740519735324 | -6.44056446430509 | 1.52896390801728  |
| C  | 1.03850365556295 | -1.84436818576245 | -1.45677493915854 |
| C  | 4.41308457660591 | 2.84786600697928  | 1.87153895740794  |

|   |                   |                   |                   |
|---|-------------------|-------------------|-------------------|
| C | 0.46310096720909  | -3.76662433306938 | 0.05405097279828  |
| C | 0.31989914318586  | -4.35498003308139 | 1.30597687552765  |
| C | 6.20924725337424  | 3.86085704818581  | 0.58198869029504  |
| H | 8.32930584830093  | 4.12729198288394  | 0.38413130526733  |
| H | 0.48922300025747  | -4.02905911040318 | 3.41901814763383  |
| C | 3.70789069899111  | 2.65430187455596  | 3.17861189137642  |
| C | 5.53417970075464  | 3.66805642844476  | 1.78151381327876  |
| C | -0.10531621300371 | -5.78589737835711 | 1.43845187093967  |
| H | 0.24235743328379  | -4.34752240475197 | -0.83631802977852 |
| H | 0.84320432811741  | -2.58884477426827 | -2.22852156669628 |
| C | 7.42661523828999  | 4.73250329293315  | 0.51158819389427  |
| H | 0.79937458404509  | -0.51665948707654 | 3.57369376187985  |
| H | 4.21243854472382  | 3.20967595183490  | 3.96919118110611  |
| H | 7.37494846422504  | 5.41497194205177  | -0.34003943391856 |
| C | 0.74013949051268  | 0.71037449350551  | 0.72477605534941  |
| H | 5.88682063660821  | 4.16891443380105  | 2.67791326099140  |
| C | 1.52438992638507  | 1.80466458212546  | 0.62558932463444  |
| H | 0.34830785769672  | -1.00984571850261 | -1.60682894011193 |
| H | -0.67323004498143 | -6.11282924798060 | 0.56596344036266  |
| H | 2.67080437475111  | 2.99669903764922  | 3.12908119100827  |
| H | -0.71641612939563 | -5.93652546569404 | 2.33053628088322  |
| H | 7.54501035046231  | 5.32215248608213  | 1.42155759808515  |
| H | -0.32961279288119 | 0.59696917639466  | 0.66921956237645  |
| H | 1.27915404040171  | 2.84136574860889  | 0.46616271144224  |
| H | 4.53178262156981  | -7.08249021813343 | -0.09485284285887 |
| H | 6.12024612577768  | -7.60598606899571 | 1.74147415032140  |
| O | 3.37852080680218  | -7.50395211996761 | 2.45735404170583  |
| C | 4.18958855943989  | -6.14009240351504 | 0.33677733164163  |
| C | 5.89909837976542  | -6.71286053648459 | 2.32859511251734  |

|   |                  |                   |                  |
|---|------------------|-------------------|------------------|
| H | 3.16957218739989 | -5.91948560344296 | 0.02144286493690 |
| S | 4.17645814613041 | -6.27825078501342 | 2.11996913226009 |
| H | 4.84963216097035 | -5.31774000721140 | 0.05517608438175 |
| H | 6.51313907257683 | -5.86956579718110 | 2.00790261700720 |
| H | 6.05541224860612 | -6.90169972390154 | 3.39072364713607 |

**[Cu(IMes)Cl] - DMSO TS**

Coordinates from ORCA-job

|    |                   |                   |                   |
|----|-------------------|-------------------|-------------------|
| H  | 6.99777600522715  | 1.73787142439472  | -0.97171859075513 |
| C  | 6.39559543569404  | 1.75371075370441  | -0.06828907445622 |
| Cl | 3.35659845274039  | -1.48558948137300 | 5.82182521980160  |
| C  | 4.51794335022989  | 0.77786526698342  | -1.41823029465659 |
| C  | 5.08765901135289  | 1.28979149807167  | -0.13083498481428 |
| Cu | 3.69558128656380  | -1.78209546205184 | 2.04842103112512  |
| H  | -0.88661392892013 | -4.09020951677730 | -0.53023950334140 |
| C  | -0.69720688315930 | -3.43832226220357 | 0.31724664501712  |
| C  | 8.37161538770589  | 2.70214005746637  | 1.15705248924029  |
| C  | 6.94819347422248  | 2.23570369874332  | 1.11479706668510  |
| C  | -1.31918112012055 | -3.69927771676623 | 1.53373054642038  |
| C  | -2.27380226482559 | -4.84558977107155 | 1.67750247919021  |
| C  | 0.16274401924755  | -2.35886696280262 | 0.14945737252256  |
| C  | 0.81251983056215  | -2.09897042905241 | -1.17495952003521 |
| C  | -1.05738638832952 | -2.85241231139156 | 2.60541281581441  |
| C  | 0.39612812256448  | -1.53456019382525 | 1.25135675000591  |
| C  | 2.58193235410442  | -0.38911589183958 | 1.32885442068667  |
| C  | 4.32894297619925  | 1.32019661426639  | 1.04148464270347  |
| C  | -0.20525193122950 | -1.75888692469486 | 2.48974951957862  |
| C  | 6.15353180761378  | 2.25776381372955  | 2.25515325713145  |
| H  | -1.53383861081909 | -3.04114307385865 | 3.56274517801757  |
| N  | 1.25447279027072  | -0.40024538326695 | 1.08499397590806  |
| N  | 2.97547224390247  | 0.85681375145242  | 0.98983522419228  |
| C  | 4.83694764309273  | 1.80616455733979  | 2.24524454128010  |
| C  | 0.05531336121041  | -0.86907631626320 | 3.66527641887542  |

|   |                   |                   |                   |
|---|-------------------|-------------------|-------------------|
| C | 0.82502154931959  | 0.81816342866154  | 0.60430891801881  |
| C | 1.91381494484609  | 1.61369482142681  | 0.54465079367878  |
| H | 6.56376952703064  | 2.64438093626888  | 3.18306210618675  |
| H | -0.20582032316728 | 1.00496559648952  | 0.35388314131406  |
| H | 2.02872251685934  | 2.63811387492322  | 0.23206728511931  |
| C | 4.00882699656153  | 1.84320131828974  | 3.49246950363263  |
| H | 1.05528732221102  | -1.03974052189695 | 4.07683342259162  |
| H | -0.66866275012028 | -1.06568572336324 | 4.45653471046658  |
| H | -0.00750989049367 | 0.18714723964436  | 3.39433147408432  |
| H | -3.30181077749742 | -4.51410158814214 | 1.49904183366371  |
| H | -2.23850297227582 | -5.26796430598277 | 2.68330700175696  |
| H | -2.05531088157250 | -5.63656551124660 | 0.95804540135649  |
| H | 0.50962212865686  | -2.85328792705872 | -1.90094783648416 |
| H | 1.90272853050736  | -2.11787303985007 | -1.09416034766764 |
| H | 0.53832006432995  | -1.11688272662014 | -1.56925021085059 |
| H | 3.02291934666790  | 2.27650227167796  | 3.30926633009624  |
| H | 4.50792048194910  | 2.43302473754346  | 4.26150706265237  |
| H | 3.84949324219074  | 0.83655785273739  | 3.89113059816384  |
| H | 8.63285004906779  | 3.25745518705010  | 0.25380506765397  |
| H | 9.05472302659140  | 1.84938310188484  | 1.22109613593311  |
| H | 8.55446172530651  | 3.33848885029218  | 2.02407395565672  |
| H | 5.27978153337854  | 0.77776737503620  | -2.19767687160096 |
| H | 3.68304291565720  | 1.39570412767724  | -1.76025420918784 |
| H | 4.13747325386111  | -0.24124563727089 | -1.30844829644034 |
| H | 3.45262433669174  | -5.00086565126457 | 3.23192250537966  |
| S | 5.06967642106715  | -3.37162584437235 | 2.77617664954376  |
| C | 4.20206459468319  | -4.49487543493084 | 3.83973979901320  |
| H | 3.73130020841047  | -3.89853078620682 | 4.62583279392298  |
| O | 5.79409742811402  | -4.14255327827641 | 1.73872201147762  |

|   |                  |                   |                  |
|---|------------------|-------------------|------------------|
| H | 5.67773350645695 | -2.21480820216951 | 4.72309410993105 |
| C | 6.24353412846561 | -2.69884443455083 | 3.92242773803905 |
| H | 6.84930687501929 | -1.97546458033437 | 3.37767326110264 |
| H | 4.92401881248458 | -5.20567173799388 | 4.24509432414525 |
| H | 6.85534570362541 | -3.52142352703489 | 4.29687221148048 |

**[Cu(IMes)Cl] - DMSO AP**

Coordinates from ORCA-job

|    |                   |                   |                   |
|----|-------------------|-------------------|-------------------|
| Cl | 7.12223803948805  | -0.18851171185885 | 4.33431245868705  |
| Cu | 3.57683385456903  | -1.26643259345337 | 1.28349710480933  |
| H  | 3.73704779026024  | 0.69692929284831  | -1.76950419429975 |
| C  | 3.98979361170100  | 1.76053171737858  | -1.78998997887099 |
| C  | 2.36415650780935  | 0.17645536812310  | 0.92053318640311  |
| H  | 1.52155256781583  | -0.84957881403463 | 3.57708381271105  |
| H  | 4.67799640613237  | 1.93343934958267  | -2.61726855784419 |
| C  | 4.60613882595677  | 2.19888126289507  | -0.49689253902750 |
| H  | 1.28528766847686  | -1.10519922903517 | -1.64727172326501 |
| C  | 5.87779403816366  | 2.76492452249573  | -0.47022672421358 |
| C  | 3.93554974726092  | 2.05562458669735  | 0.71625110733501  |
| H  | 3.06427626305737  | 2.30450098206208  | -1.99728230514282 |
| C  | 0.29475490241315  | -1.14448306629160 | 0.98107712934969  |
| C  | 0.43147105247393  | -0.86290983948561 | 3.48718999038454  |
| H  | 3.58724497861637  | 1.23858340075586  | 3.44833105870716  |
| C  | 0.00008399095898  | -1.61038916419033 | 2.26299289256983  |
| H  | 6.41624884566349  | 2.88189606378841  | -1.40570935824951 |
| N  | 1.02074922745711  | 0.08079183009790  | 0.83869077078812  |
| N  | 2.62321449059974  | 1.48351407568034  | 0.71672136171482  |
| C  | -0.10391637144172 | -1.82501664383164 | -0.16955334618777 |
| H  | 0.02157073175449  | -1.33032962213672 | 4.38243262335126  |
| C  | -0.71104249745455 | -2.80029320742104 | 2.37065540251502  |
| H  | -1.16339343694327 | -5.64385596766351 | 1.49994031874604  |
| C  | 0.21627644212377  | -1.30515671727235 | -1.53740719455123 |
| C  | 4.49183578610461  | 2.46246690825664  | 1.93064150739494  |



|   |                   |                   |                   |
|---|-------------------|-------------------|-------------------|
| C | -0.81490349319168 | -3.00926608464754 | -0.00788351940146 |
| C | -1.12450140349689 | -3.51449974011924 | 1.25038487048851  |
| C | 6.47163314268035  | 3.18046933564264  | 0.71550663489662  |
| H | 8.50944171786869  | 3.23425007302016  | 1.38928578514803  |
| H | -0.95178207607135 | -3.17500928788848 | 3.36090394450580  |
| C | 3.75441430748608  | 2.29566096861750  | 3.22335440215749  |
| C | 5.76232898006746  | 3.02286597044889  | 1.90318036965255  |
| C | -1.86446891303564 | -4.80954832551428 | 1.39642456004047  |
| H | -1.13403455686602 | -3.55010886517107 | -0.89364223333891 |
| H | -0.07978688088339 | -2.02778505176681 | -2.29775362400013 |
| C | 7.84203725975104  | 3.78740123640429  | 0.72309146918678  |
| H | 0.10067494425321  | 0.17837393941306  | 3.45860354123308  |
| H | 4.32290402606564  | 2.73180867400524  | 4.04451788975764  |
| H | 8.27924027764354  | 3.79041284911249  | -0.27607666158196 |
| C | 0.44722308575375  | 1.30796851319089  | 0.58761246785083  |
| H | 6.21153778272308  | 3.34034669118035  | 2.83931244291874  |
| C | 1.46159858754808  | 2.19606122939438  | 0.51027298656583  |
| H | -0.30697044030375 | -0.36660479485336 | -1.74088569705486 |
| H | -2.48650811974889 | -5.01118178715705 | 0.52283335217703  |
| H | 2.77279202218270  | 2.77546672545344  | 3.19047550224377  |
| H | -2.49891163700065 | -4.80581651659955 | 2.28471937951368  |
| H | 7.81071375057906  | 4.81893359427072  | 1.08477347599478  |
| H | -0.61776264007748 | 1.43672066159815  | 0.48973379405384  |
| H | 1.46328369871942  | 3.25837250414630  | 0.33174908735453  |
| H | 5.32360466758848  | -5.06907513719788 | 0.61634893046545  |
| H | 7.06097525863966  | -3.64608714037165 | 1.85709587910197  |
| O | 4.45238598502369  | -3.76966463215267 | 2.99291973568929  |
| C | 4.67146380243800  | -4.22355470255796 | 0.39073559544713  |
| C | 6.52129601126632  | -2.70865226500393 | 1.71053589016198  |

|   |                  |                   |                   |
|---|------------------|-------------------|-------------------|
| H | 3.63040233101252 | -4.53819080854684 | 0.32474933574330  |
| S | 4.78646118282748 | -3.06738932938079 | 1.73319250970950  |
| H | 4.97712187084749 | -3.72074259260254 | -0.52782700751051 |
| H | 6.76366860119799 | -2.26008718702174 | 0.74552217829993  |
| H | 6.71595340349258 | -2.00108150133216 | 2.52268792871393  |

**[Cu(IMes)Cl] - Cys- AR**

Coordinates from ORCA-job

|    |                   |                   |                   |
|----|-------------------|-------------------|-------------------|
| H  | 5.84361000240826  | 3.37691479910648  | -2.52943390860282 |
| C  | 5.62236032718091  | 3.23201508688157  | -1.47627508173802 |
| Cl | 5.81809653622911  | -2.47770385077117 | 0.30492800003533  |
| C  | 3.56597631256682  | 1.97217408370946  | -2.17847493477910 |
| C  | 4.47465597006462  | 2.52880045695025  | -1.12600150014254 |
| Cu | 4.29291232886384  | -0.98330060639084 | 0.54622294506573  |
| H  | -0.38373946651860 | -3.74865403619692 | -0.20039518541261 |
| C  | 0.02045258665558  | -3.16035347015493 | 0.61796974170057  |
| C  | 7.72768696614590  | 4.48896309554194  | -0.92349828232726 |
| C  | 6.48438493505797  | 3.75610759818109  | -0.51859253151056 |
| C  | -0.02121657696093 | -3.67004249870100 | 1.91198650117678  |
| C  | -0.64853100607841 | -5.00217515079566 | 2.19048544908621  |
| C  | 0.56856126267046  | -1.91456396404048 | 0.33666459795488  |
| C  | 0.60353154360999  | -1.39270914247077 | -1.06675583334920 |
| C  | 0.51430393226678  | -2.90553052476045 | 2.94316342716146  |
| C  | 1.08903623226505  | -1.17780136009373 | 1.40171112492281  |
| C  | 2.93213015469476  | 0.32411147806752  | 0.77546219144425  |
| C  | 4.20491618053441  | 2.35994715338170  | 0.23219039766442  |
| C  | 1.07478497423514  | -1.65299229171381 | 2.71268073488874  |
| C  | 6.17565702676612  | 3.56610202947362  | 0.82448538805785  |
| H  | 0.49745350450830  | -3.29425805259634 | 3.95790622022509  |
| N  | 1.64791479867427  | 0.11280288195034  | 1.13803046690868  |
| N  | 3.01666127974414  | 1.66340374088821  | 0.61935247282562  |
| C  | 5.03990885247280  | 2.87108159927265  | 1.22592278556450  |
| C  | 1.64385485374100  | -0.85022719208094 | 3.84235302508214  |

|   |                   |                   |                   |
|---|-------------------|-------------------|-------------------|
| C | 0.94326666128338  | 1.29576549225978  | 1.20788621517394  |
| C | 1.80959343267928  | 2.27724555089286  | 0.87958774982429  |
| H | 6.83368794099994  | 3.97339814622763  | 1.58615716828070  |
| H | -0.09843118014394 | 1.32971269102018  | 1.48023956696069  |
| H | 1.67946532393071  | 3.34407563300024  | 0.80652312780484  |
| C | 4.73106030280118  | 2.68225893457267  | 2.67934676233240  |
| H | 2.68149009896732  | -0.56741640215227 | 3.64661355169853  |
| H | 1.61166845240756  | -1.42311792343476 | 4.76918708510298  |
| H | 1.08328949236108  | 0.07634102886205  | 3.99504050386477  |
| H | -0.45918741613509 | -5.70638112272893 | 1.37772339540700  |
| H | -1.73449029430174 | -4.90370866398072 | 2.28832592024420  |
| H | -0.27184613039571 | -5.42808036799549 | 3.12232918525024  |
| H | 0.11872750600146  | -2.09419668238251 | -1.74562737692341 |
| H | 1.63215315283833  | -1.24177606144057 | -1.40601905520220 |
| H | 0.09517060676484  | -0.42840887373762 | -1.14908324204468 |
| H | 3.77613353966541  | 3.14127764012326  | 2.94917515692627  |
| H | 5.51011604669117  | 3.13092240966400  | 3.29558537508922  |
| H | 4.65855238639504  | 1.62138137394534  | 2.93388802801910  |
| H | 7.60079902578696  | 4.98045322181308  | -1.88968728675286 |
| H | 8.57068114699974  | 3.79690480641342  | -1.01615601806504 |
| H | 8.00301787970399  | 5.24083376461774  | -0.18182477667922 |
| H | 3.91444229099468  | 2.25635478589406  | -3.17139428395988 |
| H | 2.54124352422093  | 2.33301510969075  | -2.05733218507547 |
| H | 3.52783189843773  | 0.88040980627449  | -2.12732982529765 |
| S | 0.85479089227809  | -5.40562116603039 | 6.05410981656964  |
| O | -2.45010180594005 | -7.14500933747018 | 6.13843357930793  |
| H | 0.23443787128708  | -8.00289731035288 | 5.72943180231113  |
| C | -1.81987368611404 | -6.86950423082786 | 7.12947876115698  |
| C | 0.55761454591349  | -6.27292216626463 | 7.62843727456184  |

|   |                   |                   |                  |
|---|-------------------|-------------------|------------------|
| N | -0.07648950895974 | -8.46679401835343 | 6.58245073508145 |
| H | -3.14583588032915 | -5.69362298579087 | 7.75356886486118 |
| O | -2.28285131296863 | -6.01765457031441 | 8.05302501750177 |
| C | -0.46216945015624 | -7.41849622133753 | 7.50696010327942 |
| H | 0.21421577326905  | -5.57103994955703 | 8.39236734094897 |
| H | 1.48712477931764  | -6.71941593197350 | 7.99659616662846 |
| H | 0.74832431694138  | -8.92329499623229 | 6.95872252630435 |
| H | -0.58546573529296 | -7.86442327555067 | 8.50233505760361 |

### [Cu(IMes)Cl] - Cys<sup>-</sup> TS

Coordinates from ORCA-job

|    |                  |                   |                   |
|----|------------------|-------------------|-------------------|
| H  | 5.68278443264738 | 3.52872448470655  | -2.68264485655540 |
| C  | 5.51627627786885 | 3.42831466534058  | -1.61430906751996 |
| Cl | 6.05162839753118 | -2.27084107481627 | -0.37481197226136 |
| C  | 3.60128809342098 | 1.89667196763396  | -2.15454367729025 |
| C  | 4.47457141393759 | 2.61880283679632  | -1.17502467151273 |
| Cu | 4.64989124370652 | -0.83154703672764 | 0.43401313342907  |
| H  | 0.24997299535771 | -3.98981083125438 | 0.08418118229149  |
| C  | 0.61932761670772 | -3.35013986047046 | 0.88003650551817  |
| C  | 7.46766408676064 | 4.96445688538793  | -1.22596060622454 |
| C  | 6.33696089181061 | 4.11664268521481  | -0.72645803834397 |
| C  | 0.62798297703955 | -3.82302789842068 | 2.18727587915812  |
| C  | 0.10682555259860 | -5.18946947525570 | 2.51542964035959  |
| C  | 1.06850163655545 | -2.07377628249268 | 0.55619968474992  |
| C  | 1.04199379626785 | -1.59237197071394 | -0.86168598382099 |
| C  | 1.10948777643164 | -2.98663206156663 | 3.19001840788947  |
| C  | 1.54210556193343 | -1.26859316881849 | 1.59189249480717  |
| C  | 3.22199739173013 | 0.36906632709776  | 0.83369875935159  |
| C  | 4.27052956487797 | 2.50948023228792  | 0.20120055918265  |
| C  | 1.56872711154381 | -1.70309632347432 | 2.91834735009250  |
| C  | 6.09394583716902 | 3.98446965380961  | 0.63648279413574  |
| H  | 1.13085562645941 | -3.34087930169284 | 4.21629894262588  |
| N  | 1.98730251492851 | 0.05669651726500  | 1.28971667864463  |
| N  | 3.18346023381069 | 1.71176197383890  | 0.67794498904772  |
| C  | 5.06521986644758 | 3.18673526380066  | 1.12641397495048  |
| C  | 2.07265825767449 | -0.82168051586630 | 4.01957910414888  |

|   |                   |                   |                   |
|---|-------------------|-------------------|-------------------|
| C | 1.19499356689679  | 1.17898411163725  | 1.41355273942361  |
| C | 1.95175821983306  | 2.22604150062626  | 1.02656207141185  |
| H | 6.71935073113577  | 4.52049619940769  | 1.34396654056579  |
| H | 0.17610336165854  | 1.12869663307740  | 1.75962755857235  |
| H | 1.72932693872329  | 3.27822705553261  | 0.96450633494097  |
| C | 4.82530044537908  | 3.06716269328941  | 2.60002566382856  |
| H | 3.08742750828117  | -0.46955616130396 | 3.81531154425918  |
| H | 2.08129683907932  | -1.36264246305755 | 4.96581674781899  |
| H | 1.44319776254425  | 0.06436752714356  | 4.13989668325637  |
| H | 0.08860494939055  | -5.82966490523253 | 1.63212137280749  |
| H | -0.91529815942489 | -5.12988257046519 | 2.90262797213148  |
| H | 0.71545138497493  | -5.67119677923913 | 3.28336734034158  |
| H | 0.56114980925025  | -2.32916973681962 | -1.50516263151862 |
| H | 2.05468490470096  | -1.41772965173236 | -1.23608582632084 |
| H | 0.49988848817340  | -0.64768583491808 | -0.95426634552784 |
| H | 3.84100384181903  | 3.45325209888213  | 2.87866644962884  |
| H | 5.57841674145063  | 3.62747348605536  | 3.15418416926298  |
| H | 4.86792123136930  | 2.02304292598961  | 2.92229539587821  |
| H | 7.22708876131459  | 5.41820440657813  | -2.18921280144403 |
| H | 8.36985363577662  | 4.36065138701039  | -1.36621669327361 |
| H | 7.71111633184262  | 5.75731095903179  | -0.51672767359886 |
| H | 3.85582710993005  | 2.18308585200648  | -3.17505578256145 |
| H | 2.54378858680565  | 2.11719754018807  | -1.98750660187107 |
| H | 3.71966020377832  | 0.81326697409064  | -2.06208466237118 |
| S | 6.57294035065046  | -0.36874822050409 | 3.38750927499072  |
| O | 5.39639097605408  | -2.73599553246619 | 6.02286979135535  |
| H | 4.86603559839620  | -2.49576632978802 | 3.31687451659855  |
| C | 6.45151490472032  | -2.88685571570968 | 5.45726461370560  |
| C | 7.44591341804512  | -1.96556701333941 | 3.35793250687079  |

|   |                  |                   |                  |
|---|------------------|-------------------|------------------|
| N | 5.36563215364444 | -3.38322085365227 | 3.34694325531786 |
| H | 7.43655155768433 | -2.68276746285815 | 7.04510652653506 |
| O | 7.62015670240902 | -2.85829147938971 | 6.10953353368999 |
| C | 6.64451228227114 | -3.12542795867597 | 3.97849916009518 |
| H | 8.40418074102815 | -1.88311987828236 | 3.87664298845449 |
| H | 7.66025705431663 | -2.25305005069877 | 2.32395789849830 |
| H | 5.54170620633005 | -3.61778508658223 | 2.37431885056164 |
| H | 7.25975570454674 | -4.03020535744101 | 3.89528631083079 |



**[Cu(IMes)Cl] - Cys- AP**

Coordinates from ORCA-job

|    |                   |                   |                   |
|----|-------------------|-------------------|-------------------|
| H  | 5.78966515583344  | 0.40029980369061  | -2.11309962966950 |
| H  | 4.95137461912785  | -0.54174235031385 | -0.87455194123906 |
| C  | 5.04049876665707  | 0.45256002654063  | -1.32284888262416 |
| H  | 7.39719511833017  | 1.74262050729301  | -1.09098967749017 |
| H  | 1.92247709729227  | -1.91457408666880 | -0.71915338601974 |
| H  | 0.60359385300354  | -3.03854484055452 | -1.08044114141941 |
| C  | 0.84820329181208  | -2.08298940204828 | -0.61642928707912 |
| H  | 4.07459544282880  | 0.68528019557547  | -1.77716071475965 |
| Cu | 4.19983097089261  | -0.95197034623459 | 2.29562779425014  |
| H  | -0.66601960275783 | -3.90799825407028 | 0.66399447037370  |
| C  | 6.70100536405102  | 2.04244030800614  | -0.31356279167379 |
| C  | 5.43149682163373  | 1.47207586310207  | -0.29765121761935 |
| C  | -0.37010163142215 | -3.10139613186074 | 1.32784376595007  |
| C  | 0.42562172549913  | -2.07760409244617 | 0.82048338542311  |
| H  | 8.94420017332186  | 3.44524925902087  | -0.36978724690153 |
| H  | -1.75355869833620 | -5.02934010697877 | 2.44625048401890  |
| H  | 0.34266524994144  | -1.29469284577341 | -1.18172938235193 |
| H  | -1.24766252056176 | -4.64076008841330 | 4.09857659475434  |
| C  | -1.65635510714041 | -4.22350276103136 | 3.17497289954989  |
| C  | 2.93239825425331  | 0.15434677440385  | 1.37534944015148  |
| C  | -0.78945070396760 | -3.11854281467213 | 2.65206209404978  |
| C  | 8.47966607841895  | 3.56079664624021  | 0.61061229925937  |
| C  | 7.09690691370841  | 2.98280478416131  | 0.63040661642785  |
| C  | 0.80475778314251  | -1.05678026529651 | 1.69050868845848  |
| C  | 4.55130867239927  | 1.87593281318453  | 0.70542078208791  |

|   |                   |                   |                   |
|---|-------------------|-------------------|-------------------|
| H | 9.11906499758517  | 3.05642166421709  | 1.34189706557263  |
| N | 1.60001406376359  | 0.02081890345046  | 1.18787456811189  |
| N | 3.23705191994586  | 1.31255700975442  | 0.74745136829049  |
| C | -0.39262308596183 | -2.07591042835662 | 3.48509772975880  |
| C | 0.40238270256925  | -1.03256080607757 | 3.02805569760000  |
| C | 6.18295816004941  | 3.36390944325125  | 1.60854976638812  |
| C | 4.90373762088301  | 2.82460600799744  | 1.66737989452456  |
| H | -2.66011243119204 | -3.85446181896012 | 3.40583350610295  |
| C | 2.12192011557565  | 1.89115233115464  | 0.18031902996268  |
| H | 8.46873310397555  | 4.62172814166703  | 0.86892564513350  |
| C | 1.08572523607620  | 1.07302812430009  | 0.45851383571657  |
| H | -0.71146898562816 | -2.07068715123774 | 4.52320709883820  |
| H | 1.88763969070123  | 0.08278874515377  | 4.10910963210171  |
| C | 0.80603628980543  | 0.07897986768413  | 3.94698900544676  |
| H | 6.47138308642329  | 4.10320522649369  | 2.34977688994760  |
| H | 0.04018027704473  | 1.14180173821668  | 0.20861222909042  |
| H | 2.16679633320701  | 2.82079445657897  | -0.36203735943376 |
| C | 3.94111624899044  | 3.25027866498414  | 2.73336896293825  |
| H | 3.58626665206205  | 2.39318144174835  | 3.31192593937018  |
| H | 0.31467604730998  | -0.02944867318451 | 4.91394573865096  |
| H | 0.54241763784846  | 1.05552915612704  | 3.53223133235703  |
| H | 3.05850271729942  | 3.73470511470006  | 2.30679051746723  |
| H | 4.41682907778070  | 3.95351247324000  | 3.41679166769656  |
| O | 3.68758875960219  | -3.50028219309012 | 5.93191942162664  |
| N | 3.06605022234858  | -3.94880618899010 | 3.30104189161621  |
| H | 3.03625249675794  | -4.06044191456180 | 2.29261729234883  |
| H | 2.95170745537319  | -2.95448227941995 | 3.48155195798579  |
| C | 4.45170673663816  | -4.15915512403896 | 5.27125126954386  |
| C | 4.36120640058327  | -4.37932434908370 | 3.77961039589996  |

|    |                  |                   |                   |
|----|------------------|-------------------|-------------------|
| H  | 4.43913208298753 | -5.46248723763766 | 3.62259497368491  |
| H  | 5.53467258098729 | -4.58342647402971 | 6.74816739370384  |
| O  | 5.50829990974363 | -4.78288517091062 | 5.79955000544386  |
| C  | 5.58077510974861 | -3.75746819453117 | 3.07796094943933  |
| S  | 5.80557625120333 | -1.96750547003047 | 3.34636451900162  |
| H  | 5.48497308514671 | -3.96450727510310 | 2.00985556015399  |
| H  | 6.48588850554126 | -4.25175742615330 | 3.43669962376876  |
| Cl | 4.58946983926182 | -4.14336893017793 | -0.76340903175900 |

## [Cu(IMes)Cl] - Ligand Scrambling AR

Coordinates from ORCA-job

|    |                   |                   |                   |
|----|-------------------|-------------------|-------------------|
| H  | 6.77497832305940  | 1.88778057666741  | -2.79410561032674 |
| C  | 6.40028467919135  | 2.22804097650468  | -1.83330638658371 |
| Cl | 5.77977599803246  | -1.85657772609351 | 2.44190998863525  |
| C  | 4.28887136366012  | 0.95548577344454  | -2.31129200201043 |
| C  | 5.12790794132530  | 1.83524688077104  | -1.43639865412333 |
| Cu | 4.35689264880478  | -0.43584827265348 | 1.69364826786154  |
| H  | -0.27827275979925 | -3.24499268785489 | 1.61421904102553  |
| C  | 0.00933219200120  | -2.30368490149921 | 2.07272928939074  |
| C  | 8.58058533297961  | 3.42350543815707  | -1.47815214551419 |
| C  | 7.20105452721468  | 3.04026159668305  | -1.03552039966507 |
| C  | -0.31043663882157 | -2.06718919308835 | 3.40456715896936  |
| C  | -1.01242650271049 | -3.10527987523537 | 4.22667910478644  |
| C  | 0.69189561034565  | -1.36632399096286 | 1.30270424149920  |
| C  | 1.03152321169671  | -1.65257891857675 | -0.12777209873755 |
| C  | 0.05569132045674  | -0.84818293309522 | 3.96856213321310  |
| C  | 1.05052649466627  | -0.16442010889800 | 1.91109536059324  |
| C  | 3.10651939971512  | 0.81247328578226  | 0.99773369736000  |
| C  | 4.66407925060998  | 2.28512937335582  | -0.19910161796138 |
| C  | 0.73670161312696  | 0.12001310064944  | 3.24113116826362  |
| C  | 6.69727361706737  | 3.47036431104987  | 0.18671023743260  |
| H  | -0.19075762301254 | -0.64316601559462 | 5.00623980526569  |
| N  | 1.76472063204870  | 0.81347484098746  | 1.14937966282078  |
| N  | 3.35625805535328  | 1.89472104737346  | 0.22944764188358  |
| C  | 5.42886356883707  | 3.10613400097840  | 0.62822571708670  |
| C  | 1.12264292841411  | 1.42226304381771  | 3.87333295349471  |

|    |                   |                   |                   |
|----|-------------------|-------------------|-------------------|
| C  | 1.18521389973150  | 1.87692259351422  | 0.49023262137940  |
| C  | 2.19266759092710  | 2.56068080205302  | -0.09325384471717 |
| H  | 7.30481009260924  | 4.11150313564029  | 0.81817549108494  |
| H  | 0.12169898142542  | 2.04801088422870  | 0.49611277340258  |
| H  | 2.18793050762318  | 3.45029893571006  | -0.70067322436329 |
| C  | 4.91166658129196  | 3.58231527930155  | 1.95067724049718  |
| H  | 2.20297306479228  | 1.58327744544779  | 3.82250837818079  |
| H  | 0.82086105678549  | 1.44053927519833  | 4.92056022555683  |
| H  | 0.65016938047492  | 2.26844779974843  | 3.36725869504689  |
| H  | -1.46040041500496 | -3.87469905053638 | 3.59627562738885  |
| H  | -1.79607923384607 | -2.65919072491832 | 4.84292436258442  |
| H  | -0.30900995670735 | -3.59753125136626 | 4.90581187772452  |
| H  | 0.59082486571268  | -2.59874297171594 | -0.44184112711881 |
| H  | 2.11425892725114  | -1.71514031408840 | -0.27012792146438 |
| H  | 0.66728517848061  | -0.86500083940492 | -0.79243235282068 |
| H  | 3.95923468958937  | 4.10774051908649  | 1.84272076303505  |
| H  | 5.62653323463152  | 4.25963130090005  | 2.41785980790418  |
| H  | 4.73835186472589  | 2.74349806188780  | 2.63065081454998  |
| H  | 8.60344107506979  | 3.65581534207825  | -2.54493909383723 |
| H  | 9.28222893178794  | 2.60023930837722  | -1.31149433754179 |
| H  | 8.94751079630290  | 4.28883912000019  | -0.92435003274159 |
| H  | 4.83636272057278  | 0.68161265701871  | -3.21309103581405 |
| H  | 3.36392466267503  | 1.45516790760932  | -2.61166625831630 |
| H  | 4.00146718212603  | 0.03818038138435  | -1.79037175902093 |
| Cl | -0.37544243024349 | 0.06377440441124  | 7.79350112268415  |
| Cu | 1.06391129409785  | -1.36514589174605 | 8.48866243812767  |
| H  | -3.55896850058921 | -6.19308314559942 | 9.04284251856234  |
| H  | 5.65947754353774  | 3.13421372887579  | 7.44867882389918  |
| H  | 6.98266776947101  | 2.19525107707104  | 6.76005583974371  |

|   |                   |                   |                   |
|---|-------------------|-------------------|-------------------|
| C | -2.99745253610996 | -6.30975047856038 | 9.97277283163082  |
| C | 6.38730554894214  | 2.34498033378072  | 7.66220520844032  |
| C | 5.69196615345700  | 1.08150433655574  | 8.07099627956554  |
| C | -1.65124816500130 | -5.65778352567490 | 9.87520979253320  |
| C | 5.38625023155096  | 0.09946346423677  | 7.13490248547217  |
| H | 5.67628192367505  | 0.24167923136780  | 6.09818558279375  |
| H | -3.58466867373844 | -5.88359211259958 | 10.78710706909806 |
| C | -0.82126005688084 | -5.90478930372384 | 8.78477721352559  |
| H | 3.32104077980519  | -2.21553253466792 | 6.32859946562720  |
| H | -2.89751662934458 | -7.38377207964558 | 10.15513759696863 |
| H | -1.16185706866942 | -6.56628553183565 | 7.99376131706216  |
| C | -1.19675581536739 | -4.80179574589341 | 10.87097235556945 |
| C | 5.31902701702464  | 0.87264910411454  | 9.39506866173887  |
| H | 1.57846444253841  | -4.67226048947805 | 6.97081790560888  |
| C | 2.34836985390280  | -2.60807416533930 | 9.12571528683895  |
| H | 4.83635976774646  | -1.84232470920579 | 5.49444683488241  |
| C | 4.72155049546212  | -1.07096962396785 | 7.48743784348484  |
| H | -1.83122181282777 | -4.59700026250784 | 11.72792454008936 |
| H | 0.60910873558662  | -2.24581114446248 | 11.51879332752067 |
| H | 5.55356880186440  | 1.62679660470127  | 10.14031871658860 |
| C | 4.40228746420149  | -2.11061811256470 | 6.45779553603080  |
| C | 0.43553260662998  | -5.32335544471165 | 8.67245312998427  |
| H | 3.18547131821738  | -0.64975939956204 | 11.32656032048567 |
| H | 0.78642654127160  | -6.24399736674471 | 6.77481873548386  |
| C | 0.05418215679025  | -4.19458691307063 | 10.80531041209665 |
| C | 4.65219700597592  | -0.27890483913066 | 9.79765214098705  |
| C | 1.30469334541867  | -5.59839466850615 | 7.48368908286113  |
| H | 7.04018988206591  | 2.71221062820004  | 8.45620982988023  |
| C | 4.36321288982860  | -1.23708900067957 | 8.82519155876100  |

|   |                   |                   |                   |
|---|-------------------|-------------------|-------------------|
| C | 0.85155230338611  | -4.46905948944769 | 9.69572064131583  |
| C | 0.51228962236838  | -3.27003750595076 | 11.89061449592875 |
| C | 4.26030552168976  | -0.47448370340229 | 11.22999389082658 |
| H | -0.20043651931660 | -3.26791966250851 | 12.71538935901971 |
| N | 3.68453013400753  | -2.43473585023459 | 9.21664066956433  |
| N | 2.14023900068348  | -3.85492851702255 | 9.60090402725442  |
| H | 4.51929028758159  | 0.40549308717192  | 11.81869420349191 |
| H | 4.78617056789092  | -3.09234907509185 | 6.74705370118543  |
| H | 2.23695328365878  | -6.09020761706548 | 7.77397553650926  |
| H | 1.49059420923399  | -3.56232386427657 | 12.28048428527159 |
| H | 4.76611270410454  | -1.33861870049156 | 11.66923415946633 |
| C | 4.30141029573697  | -3.55165232315279 | 9.73930118330952  |
| C | 3.32395888527531  | -4.45057127897325 | 9.98238331715409  |
| H | 5.36686282145411  | -3.60421928315308 | 9.88885873926537  |
| H | 3.36191413865965  | -5.44779785966080 | 10.38785574056303 |

### [Cu(IMes)Cl] - Ligand Scrambling TS

Coordinates from ORCA-job

|    |                   |                   |                  |
|----|-------------------|-------------------|------------------|
| H  | 6.76484302294333  | 2.48302867944691  | 3.03642451796479 |
| C  | 5.70822226098522  | 2.61098607223965  | 3.25149707434884 |
| Cl | 0.63284281927047  | 0.72461305658116  | 6.57626015025591 |
| C  | 5.27626141706476  | 0.55458767361654  | 1.88013171023386 |
| C  | 4.80702708725344  | 1.67202462060757  | 2.75857390033459 |
| Cu | 2.23221255053860  | -0.49034053718738 | 5.14311278411820 |
| H  | 0.36505164609348  | -5.23881700886098 | 1.96118538111894 |
| C  | 0.00966879485015  | -4.26660426101117 | 2.28895491981309 |
| C  | 6.27881762843316  | 4.68892476488935  | 4.54779509226566 |
| C  | 5.29013991721277  | 3.70805088703426  | 3.99488370966244 |
| C  | -1.26687939278196 | -4.15084456231047 | 2.82633582295232 |
| C  | -2.13991344211624 | -5.35602080881803 | 2.99911629804993 |
| C  | 0.84825625572525  | -3.16632529496646 | 2.14570245881925 |
| C  | 2.20078213153815  | -3.31775939423961 | 1.52082972457424 |
| C  | -1.70665688358190 | -2.89171837573422 | 3.22126443229984 |
| C  | 0.37600083698617  | -1.92548632685706 | 2.57262516587353 |
| C  | 2.00763735677992  | -0.16651007219307 | 3.25183574492994 |
| C  | 3.45656448831067  | 1.84170276825793  | 3.06080132306899 |
| C  | -0.90576546454237 | -1.76197072069441 | 3.10115881190403 |
| C  | 3.92649049303680  | 3.87521220081686  | 4.21591868529149 |
| H  | -2.70716632546545 | -2.77951178622282 | 3.62827314129201 |
| N  | 1.18744096212255  | -0.76712962750699 | 2.35405724298462 |
| N  | 2.51692785311949  | 0.88547721485642  | 2.55981182221620 |
| C  | 2.98817247174607  | 2.96019158399118  | 3.75357060255610 |
| C  | -1.42078204816273 | -0.41397063300305 | 3.49965639293151 |



|    |                   |                   |                   |
|----|-------------------|-------------------|-------------------|
| C  | 1.18800429857790  | -0.10858523941795 | 1.14155514961214  |
| C  | 2.02765771505044  | 0.93524690024693  | 1.27221187364764  |
| H  | 3.57717790821777  | 4.74707360135841  | 4.76080771392282  |
| H  | 0.59163925055589  | -0.44288156130515 | 0.30923198298710  |
| H  | 2.31917382966555  | 1.70462836967882  | 0.57705312868033  |
| C  | 1.52561528215097  | 3.19299395069829  | 3.96809541523438  |
| H  | -0.81589123154161 | 0.02251941784715  | 4.29891910984853  |
| H  | -2.45066317854423 | -0.48936448993467 | 3.84936583750125  |
| H  | -1.39613283843880 | 0.28433687098090  | 2.65823314779738  |
| H  | -1.85074202974157 | -6.15620597172456 | 2.31601836406756  |
| H  | -3.19050927951444 | -5.11233129572521 | 2.82927284242108  |
| H  | -2.05821884168943 | -5.74690122118601 | 4.01867331780440  |
| H  | 2.42648166925969  | -4.37079934677736 | 1.35264369716194  |
| H  | 2.98439996274410  | -2.89198235018913 | 2.15015305271334  |
| H  | 2.25080386198839  | -2.80251053566045 | 0.55735056152329  |
| H  | 0.97328005819270  | 3.12471910477960  | 3.02726550793256  |
| H  | 1.35852549747520  | 4.18316174563450  | 4.39318134241360  |
| H  | 1.10218772456652  | 2.45110210410664  | 4.65060799663983  |
| H  | 6.41512775953746  | 4.53324129149579  | 5.62258397037343  |
| H  | 5.93440187340686  | 5.71666907645166  | 4.41300817710624  |
| H  | 7.25362513163415  | 4.58226982980021  | 4.06986190994727  |
| H  | 6.36120704238460  | 0.46573626461044  | 1.91971059680785  |
| H  | 4.99171579907403  | 0.73960611665020  | 0.83966106138041  |
| H  | 4.83733829967435  | -0.40228313998445 | 2.16538988210236  |
| Cl | 3.76807834367704  | 2.32610456448297  | 8.00623115675862  |
| Cu | 3.05501629059332  | 0.41303249838275  | 7.21050120065422  |
| H  | -2.67023451374910 | -2.70041636074634 | 10.58281098163232 |
| H  | 9.09496441157143  | 1.28286949565859  | 4.03603123625235  |
| H  | 9.78990008089138  | -0.31068401907629 | 3.75397414505868  |

|   |                   |                   |                   |
|---|-------------------|-------------------|-------------------|
| C | -2.64676133076771 | -2.49475645691945 | 9.51041811310645  |
| C | 9.33832596309745  | 0.32877491209520  | 4.51469691977239  |
| C | 8.10688738930248  | -0.29938180316400 | 5.09139573539420  |
| C | -1.24257023958925 | -2.49883887719031 | 8.98755030001255  |
| C | 7.29288857313560  | -1.11414124680755 | 4.31241006892297  |
| H | 7.57506419981299  | -1.32596382245559 | 3.28605661947948  |
| H | -3.26167439527619 | -3.23735387758601 | 8.99999254118007  |
| C | -0.93292995092134 | -3.10012603252171 | 7.77343505094660  |
| H | 5.31635502973659  | -3.61301257059658 | 4.34723405600229  |
| H | -3.11293647104876 | -1.51613981348151 | 9.35940780859870  |
| H | -1.71605087636066 | -3.59604200449501 | 7.20809968561861  |
| C | -0.21434470512013 | -1.89907755707668 | 9.70709386813415  |
| C | 7.74822938019754  | -0.08145537881638 | 6.41686664089113  |
| H | 1.14295811394133  | -3.11310222005677 | 5.25591565986838  |
| C | 3.38750700146227  | -1.48818151971994 | 6.87725862916603  |
| H | 4.24147539563681  | -2.27174959247155 | 3.97168425207386  |
| C | 6.12446106100344  | -1.67592870574600 | 4.81235295529928  |
| H | -0.43011795027129 | -1.45205994335959 | 10.67297887600410 |
| H | 2.44091332709968  | -0.24433771756593 | 9.66185043398456  |
| H | 8.39435315089939  | 0.51647787021553  | 7.05235543035447  |
| C | 5.28843140917297  | -2.58681814166863 | 3.96954633414158  |
| C | 0.36010318554399  | -3.09806133086559 | 7.26138051142815  |
| H | 5.39492649446608  | 0.14829691219742  | 8.57193118252987  |
| H | -0.24509775006297 | -4.17205158428682 | 5.51758754190425  |
| C | 1.09292808976310  | -1.86581918732624 | 9.23623396869305  |
| C | 6.59800006392742  | -0.63423085940049 | 6.97007158546900  |
| C | 0.66770775284231  | -3.79021006935328 | 5.97140690086816  |
| H | 10.08043177779277 | 0.53050179016236  | 5.28890192221151  |
| C | 5.77835708951426  | -1.39433379499920 | 6.13375960072705  |

|   |                  |                   |                   |
|---|------------------|-------------------|-------------------|
| C | 1.35103429309489 | -2.44880089108684 | 7.99524758312927  |
| C | 2.17158366718530 | -1.22993310765851 | 10.05627206488120 |
| C | 6.29552499025211 | -0.45359172814040 | 8.42475210497196  |
| H | 1.83414076583314 | -1.09262713769934 | 11.08400747007296 |
| N | 4.62281005195090 | -2.03478121569552 | 6.68821854762212  |
| N | 2.69829233404781 | -2.48711974039667 | 7.50516167351216  |
| H | 7.12533007724459 | 0.04883924359940  | 8.92226931755608  |
| H | 5.64884235558163 | -2.59747464816494 | 2.94117140915773  |
| H | 1.35050649724282 | -4.63093152155335 | 6.12174008679555  |
| H | 3.08344654429842 | -1.83063480168217 | 10.06727343506850 |
| H | 6.13147043923579 | -1.41522351223308 | 8.91819134680982  |
| C | 4.69081310218351 | -3.31615135793740 | 7.17194920030652  |
| C | 3.47750448401162 | -3.60132211699673 | 7.68703883248763  |
| H | 5.59270433626234 | -3.90208646413013 | 7.11263190627792  |
| H | 3.10135866777338 | -4.48769416086774 | 8.16989055812193  |

### [Cu(IMes)Cl] - Ligand Scrambling TS - D3BJ

Coordinates from ORCA-job

|    |                   |                   |                  |
|----|-------------------|-------------------|------------------|
| H  | 6.87092114163588  | 2.03850617531057  | 2.63203544962888 |
| C  | 5.85643633779199  | 2.22125931261898  | 2.97009855822669 |
| Cl | 0.49758646478629  | 0.56185293855528  | 6.63057343163038 |
| C  | 5.12951514611230  | 0.31885313885801  | 1.50769598235499 |
| C  | 4.83897279897730  | 1.39626937522703  | 2.50511499603232 |
| Cu | 2.04591843337529  | -0.47309882210103 | 5.15762084729484 |
| H  | 0.23306353388047  | -5.27174593656130 | 2.19634596264756 |
| C  | -0.11850199351995 | -4.28256599119716 | 2.47278762820541 |
| C  | 6.73082106290064  | 4.08957999381325  | 4.40106249837627 |
| C  | 5.60872383555219  | 3.26018033554357  | 3.85790628442534 |
| C  | -1.38882396198511 | -4.13529244806587 | 3.01829556199059 |
| C  | -2.25859942516723 | -5.32848597289062 | 3.26775462805868 |
| C  | 0.72349549887789  | -3.19412688552690 | 2.27840625155722 |
| C  | 2.09448440039697  | -3.37407034948619 | 1.70618532401623 |
| C  | -1.81851070230084 | -2.85916760527364 | 3.36727214180145 |
| C  | 0.25245966489085  | -1.93322977634214 | 2.63860580402947 |
| C  | 1.93996684387423  | -0.22315688644713 | 3.23661409432953 |
| C  | 3.54580809742590  | 1.63329473847209  | 2.96761974164596 |
| C  | -1.01668817885915 | -1.73891551275374 | 3.18090415457748 |
| C  | 4.29440815361600  | 3.49975455812313  | 4.24664285031544 |
| H  | -2.80992004233293 | -2.72627313852122 | 3.78940696387807 |
| N  | 1.07485033034745  | -0.79759329167314 | 2.36827910062827 |
| N  | 2.49852149343474  | 0.77728627609151  | 2.51096502699954 |
| C  | 3.24245164299032  | 2.70556090776656  | 3.80717046341133 |
| C  | -1.50641945268365 | -0.37069835160751 | 3.53549866917787 |

|    |                   |                   |                  |
|----|-------------------|-------------------|------------------|
| C  | 1.09007060812170  | -0.17227450334167 | 1.13767007516089 |
| C  | 1.99108574202109  | 0.82543228951917  | 1.22926476921615 |
| H  | 4.07689373943663  | 4.33145796531522  | 4.90950359469345 |
| H  | 0.46268528960318  | -0.49587786553391 | 0.32424671292278 |
| H  | 2.31792706593181  | 1.55809016650351  | 0.51086143257055 |
| C  | 1.83310933772960  | 3.01596757261062  | 4.19854432715817 |
| H  | -0.89158281012632 | 0.07312802757326  | 4.32333644656262 |
| H  | -2.53720089753789 | -0.41506657681415 | 3.88743110124998 |
| H  | -1.46480062203152 | 0.30174238518601  | 2.67435793099304 |
| H  | -1.97734319496356 | -6.16513467007356 | 2.62646001349211 |
| H  | -3.31154095093054 | -5.09443657439357 | 3.09960122105648 |
| H  | -2.16135934819128 | -5.66081905085394 | 4.30676523580265 |
| H  | 2.28117145673612  | -4.42467427408001 | 1.48497995595602 |
| H  | 2.85850071665601  | -3.02814512805460 | 2.40684874691731 |
| H  | 2.22446897521303  | -2.79910922516145 | 0.78574725019922 |
| H  | 1.17817915412218  | 3.04053991789632  | 3.32353336605205 |
| H  | 1.78415604484877  | 3.98458716492439  | 4.69664545152552 |
| H  | 1.43122834197896  | 2.26184311438685  | 4.87990723877926 |
| H  | 6.43248740775184  | 5.13294235592001  | 4.52158701013290 |
| H  | 7.60655853960358  | 4.04650126022530  | 3.75193485432855 |
| H  | 7.03270858981992  | 3.72132727727469  | 5.38705740121311 |
| H  | 6.18972154704644  | 0.06694176894868  | 1.51476559656233 |
| H  | 4.87368687682587  | 0.65075503356022  | 0.49680940523565 |
| H  | 4.55278381685264  | -0.58540848519522 | 1.70361707271251 |
| Cl | 3.59433417290252  | 2.40606001433666  | 8.00255641414445 |
| Cu | 2.97617800850436  | 0.43189338237474  | 7.24666892355584 |
| H  | -3.17016608264022 | -3.48962104805365 | 8.97311242204636 |
| H  | 9.36687210639083  | 1.84957215687010  | 5.36956528356827 |
| H  | 8.95593312670827  | 1.35545236825507  | 3.71814280353983 |

|   |                   |                   |                   |
|---|-------------------|-------------------|-------------------|
| C | -2.65866486180510 | -2.56324232774011 | 9.24192166251789  |
| C | 9.12939363208396  | 0.99531909721862  | 4.73395827318975  |
| C | 7.94090232068992  | 0.24605461340386  | 5.25251223397460  |
| C | -1.22879981818765 | -2.58080183563061 | 8.79618059810186  |
| C | 7.21349195363276  | -0.59460144253181 | 4.41552163758412  |
| H | 7.50473647358424  | -0.69351273191994 | 3.37508214342424  |
| H | -3.19986710019797 | -1.74236306490628 | 8.76081589157583  |
| C | -0.86953047335968 | -3.16420813380648 | 7.58430548564162  |
| H | 5.32228000982640  | -3.23543731294403 | 4.34008049170448  |
| H | -2.73572749157487 | -2.42090483586016 | 10.32089483226429 |
| H | -1.63042778401385 | -3.63676271340908 | 6.97040742384839  |
| C | -0.23381721114457 | -1.99873588881390 | 9.57196575636458  |
| C | 7.56032095922398  | 0.34857366066801  | 6.58479690697529  |
| H | 1.33673324273069  | -3.09077811706403 | 5.17517593940191  |
| C | 3.40680454997621  | -1.45034590891773 | 6.93678667993565  |
| H | 4.29108949324655  | -1.87776019816399 | 3.90924325307479  |
| C | 6.11429537052968  | -1.30710516751609 | 4.87374852288003  |
| H | -0.49381827882185 | -1.55880817687794 | 10.52991799819577 |
| H | 2.35902903744007  | -0.30064520908978 | 9.65912374581233  |
| H | 8.12950133268882  | 0.98575762423226  | 7.25461418519052  |
| C | 5.33309642229150  | -2.20704286525069 | 3.97043534935514  |
| C | 0.44306025644819  | -3.15560829734664 | 7.13180634448636  |
| H | 5.25959307827691  | 0.35551362150715  | 8.70949894774502  |
| H | -0.07958864713098 | -4.13088314029570 | 5.30685135804125  |
| C | 1.09363046399771  | -1.96072679590470 | 9.15809718036554  |
| C | 6.47982321386161  | -0.36280972302788 | 7.09805299325780  |
| C | 0.81119741947026  | -3.79210089723570 | 5.83050397582545  |
| H | 10.01113757255612 | 0.34770874652174  | 4.70264989702042  |
| C | 5.75684559232445  | -1.16002653371653 | 6.21336619735622  |

|   |                  |                   |                   |
|---|------------------|-------------------|-------------------|
| C | 1.40161522185404 | -2.53019661614759 | 7.92670957521620  |
| C | 2.13621890498061 | -1.31324807377244 | 10.01356037989770 |
| C | 6.13358701524860 | -0.28294040862277 | 8.55165807176510  |
| H | 1.78635808951557 | -1.23182539119319 | 11.04306937731621 |
| N | 4.65754244590247 | -1.92513796674078 | 6.70914122357449  |
| N | 2.75607158298288 | -2.51802414964208 | 7.47139104459187  |
| H | 6.96649544212367 | 0.13807770247350  | 9.11546072519786  |
| H | 5.75736123469781 | -2.20984180292314 | 2.96786785804350  |
| H | 1.47265179422531 | -4.65045984869250 | 5.97463497705866  |
| H | 3.07631219869710 | -1.86801212806420 | 10.00418521843277 |
| H | 5.89750161515986 | -1.26729090552463 | 8.96174092202369  |
| C | 4.78085804539682 | -3.24048102871559 | 7.08670848981990  |
| C | 3.57670056245169 | -3.61600278885451 | 7.56790219044545  |
| H | 5.70764489672513 | -3.78016369688183 | 6.98778991076755  |
| H | 3.23198233914886 | -4.55231254437190 | 7.97334965754156  |

## [Cu(IMes)Cl] - Ligand Scrambling AP

Coordinates from ORCA-job

|   |                   |                   |                   |
|---|-------------------|-------------------|-------------------|
| H | 7.39479669920115  | -2.27491897624643 | -2.42317933433622 |
| C | 7.12573632624597  | -1.82771028731482 | -1.47106216492297 |
| C | 4.82073661568278  | -2.77388504333126 | -1.78677337319310 |
| C | 5.82580126488266  | -1.98903871500322 | -1.00138315578305 |
| H | -0.32803793209759 | -5.91654965799365 | 2.24430335025507  |
| C | 0.19994004527862  | -5.09312368816310 | 2.71560805751745  |
| C | 9.48337846406420  | -0.97599715565615 | -1.26916733361897 |
| C | 8.08077998745243  | -1.11103766358418 | -0.75849326723337 |
| C | 0.08915332477081  | -4.90840810030206 | 4.08849412748955  |
| C | -0.75245443928427 | -5.82165905790441 | 4.92738190623009  |
| C | 0.97632630508292  | -4.25432310138137 | 1.92088009205408  |
| C | 1.08935435163468  | -4.48494466660784 | 0.44541691083257  |
| C | 0.77534432481848  | -3.84672479696678 | 4.67244505212280  |
| C | 1.65164354450323  | -3.20859614881266 | 2.54770574353688  |
| C | 3.77205047682073  | -2.60662127909441 | 1.47941146436295  |
| C | 5.49944278265737  | -1.40355779333284 | 0.22154479381647  |
| C | 1.56440793298289  | -2.98305700020472 | 3.92301872540368  |
| C | 7.71058238219556  | -0.54054591454163 | 0.45530019147331  |
| H | 0.70511829569311  | -3.69109378769490 | 5.74494755900541  |
| N | 2.47721165545076  | -2.34674847360315 | 1.75755105858225  |
| N | 4.17079353478532  | -1.55616004157796 | 0.73146604897873  |
| C | 6.42525960678362  | -0.67311678457462 | 0.96798373974880  |
| C | 2.30426403143094  | -1.85805717966561 | 4.57958202277041  |
| C | 2.07111832191717  | -1.15635016631601 | 1.19356605786504  |
| C | 3.14375008471672  | -0.65570655498804 | 0.54303192010337  |



|    |                   |                   |                   |
|----|-------------------|-------------------|-------------------|
| H  | 8.44193611672729  | 0.02624015109455  | 1.02350879676993  |
| H  | 1.06803575109096  | -0.77915284694427 | 1.30305639272634  |
| H  | 3.26766285599899  | 0.24795397312170  | -0.03008108235204 |
| C  | 6.05971016797174  | -0.05736301582175 | 2.28336611005917  |
| H  | 3.38159075128183  | -1.94065130643370 | 4.41077860916455  |
| H  | 2.12490444122467  | -1.86161703763760 | 5.65474530837615  |
| H  | 1.99234765628736  | -0.88800616623117 | 4.18344652082999  |
| H  | -1.64822837837678 | -5.30599750563034 | 5.28599006838176  |
| H  | -0.20178191727360 | -6.15959608110918 | 5.80919787001524  |
| H  | -1.07227384741202 | -6.69759822559395 | 4.36144900518023  |
| H  | 0.43462787440292  | -5.29932492674421 | 0.13509510036971  |
| H  | 2.11436462232519  | -4.74575123824286 | 0.16631873110997  |
| H  | 0.82078255882313  | -3.59072323678809 | -0.12272636169785 |
| H  | 5.22621786220081  | 0.64280542369533  | 2.18367438437955  |
| H  | 6.91016925955576  | 0.48284447790225  | 2.69921688957737  |
| H  | 5.75234096703039  | -0.81967534377752 | 3.00494878093652  |
| H  | 9.52682469559010  | -1.10931095080251 | -2.35123951479002 |
| H  | 10.13197317997516 | -1.73306333982876 | -0.81677331568991 |
| H  | 9.90257980382507  | 0.00064695018467  | -1.01971553928327 |
| H  | 5.25230465707810  | -3.11043597730684 | -2.72941772318064 |
| H  | 3.93054150683865  | -2.17933010893263 | -2.00847435644421 |
| H  | 4.48672167062320  | -3.65367651154494 | -1.22948042793128 |
| Cu | 4.78326126724579  | -4.14927314490503 | 2.00587775943365  |
| H  | 0.82389427224106  | -7.86411689928847 | -1.63943346879909 |
| H  | 8.37769245221810  | -0.40180060528089 | 6.08338694874448  |
| H  | 9.91029010454432  | -0.71762672845426 | 5.25787157463656  |
| C  | 1.48246956252475  | -8.70511452574511 | -1.39927832760521 |
| C  | 9.13644114977360  | -1.16356243506438 | 5.88370501551741  |
| C  | 8.52939261025201  | -2.36405592776846 | 5.22306709096867  |

|   |                  |                   |                   |
|---|------------------|-------------------|-------------------|
| C | 2.56384191910039 | -8.27458136463381 | -0.45526446726822 |
| C | 8.93699631226885 | -2.76815540222330 | 3.95774402200029  |
| H | 9.70805606574872 | -2.20461957441531 | 3.44120518281589  |
| H | 0.86340041644805 | -9.48980786379204 | -0.96108103630657 |
| C | 3.77010173871205 | -7.77447580966005 | -0.93454358809220 |
| H | 8.02763608560698 | -4.18078377154971 | 1.23036347820956  |
| H | 1.89951009084555 | -9.07127423223804 | -2.33906905400503 |
| H | 3.93825727493896 | -7.72307252829230 | -2.00604450723211 |
| C | 2.37740318943103 | -8.34393834178023 | 0.92128322205031  |
| C | 7.53949903456906 | -3.10182078867021 | 5.86724871713751  |
| H | 6.18494628001528 | -5.74551433593328 | -0.38471469883912 |
| C | 5.77021971550935 | -5.70091916572246 | 2.54856630774632  |
| H | 9.66893076105490 | -3.65783805165600 | 1.63077848615314  |
| C | 8.38649687746335 | -3.88068698962119 | 3.32736957939330  |
| H | 1.44473414667840 | -8.73697449756427 | 1.31451403362891  |
| H | 3.22322217782897 | -7.02782763729888 | 3.77139812464882  |
| H | 7.20655130590416 | -2.80064421467235 | 6.85606993337493  |
| C | 8.83834774549996 | -4.28363574099932 | 1.95763718967859  |
| C | 4.77785182541732 | -7.34092757800634 | -0.07964804641869 |
| H | 4.96173110401673 | -5.00552341540014 | 5.41416815148516  |
| H | 6.09146414533527 | -6.91274853574433 | -1.71109836797665 |
| C | 3.35361841431190 | -7.92269035754259 | 1.81798054322123  |
| C | 6.95917924097349 | -4.21962055776806 | 5.28119602289689  |
| C | 6.06517490527174 | -6.80540434212975 | -0.62668131109304 |
| H | 9.58356931986031 | -1.43000738398630 | 6.84515201812977  |
| C | 7.40117951289673 | -4.59175228458429 | 4.00974148998001  |
| C | 4.54550119375739 | -7.42154479176225 | 1.29393190348258  |
| C | 3.12118853130655 | -8.00681339608819 | 3.29501047937912  |
| C | 5.88982753620884 | -4.98995700370873 | 5.99234109484770  |

|    |                  |                   |                   |
|----|------------------|-------------------|-------------------|
| H  | 2.11976124795162 | -8.38441694628638 | 3.50184577168518  |
| N  | 6.82625524777724 | -5.74555696114856 | 3.38781532206355  |
| N  | 5.57001159268133 | -6.98841248717330 | 2.19466140941893  |
| H  | 5.67979062321726 | -4.54259109057808 | 6.96380193483023  |
| H  | 9.16148239911201 | -5.32736912785022 | 1.93097548863902  |
| H  | 6.92839435113644 | -7.32845363566412 | -0.20719265991784 |
| H  | 3.84112563941121 | -8.67270114367427 | 3.77824477851052  |
| H  | 6.18294171863714 | -6.03103459703928 | 6.15177413917199  |
| C  | 7.28008558600022 | -7.03646084087086 | 3.55672441635656  |
| C  | 6.48462901466965 | -7.82338277334154 | 2.80080528712163  |
| H  | 8.11777096649600 | -7.27419897741093 | 4.19091238139643  |
| H  | 6.48722471040846 | -8.88858299144479 | 2.64031184404091  |
| Cu | 2.23566754471918 | -5.83918309534894 | 8.14448624069398  |
| Cl | 1.54554536529669 | -3.93558689805676 | 8.83766368134857  |
| Cl | 2.92914546324045 | -7.73933333192249 | 7.44703402914420  |

**[Au(IMes)Cl] - DMSO AR**

Coordinates from ORCA-job

|    |                   |                   |                   |
|----|-------------------|-------------------|-------------------|
| Cl | 5.52522672680379  | -2.83543818472929 | 1.43491382330220  |
| Au | 3.90228461767618  | -1.23057800901718 | 1.15546408846199  |
| H  | 3.89381476954088  | 0.71442178298664  | -1.72525934396742 |
| C  | 4.05182081377904  | 1.79579970716941  | -1.76186030885979 |
| C  | 2.50277238518357  | 0.14968572980172  | 0.90890209086792  |
| H  | 1.55832392548675  | -0.82075886543388 | 3.65011220923147  |
| H  | 4.72610758989010  | 2.01626497557601  | -2.58929985759705 |
| C  | 4.62086566549928  | 2.30400445714439  | -0.47369001376054 |
| H  | 1.69851773184437  | -1.40937510852162 | -1.56363179832559 |
| C  | 5.84494602921945  | 2.96174751884223  | -0.44525162963191 |
| C  | 3.94687817282526  | 2.13690902029858  | 0.73595684752396  |
| H  | 3.08316083684912  | 2.25416455071011  | -1.97879439229580 |
| C  | 0.51561784148513  | -1.30237403473456 | 1.01418512593876  |
| C  | 0.47755083546559  | -0.90947116054669 | 3.50715433138298  |
| H  | 3.59964732048944  | 1.36415951431682  | 3.47278192167795  |
| C  | 0.16115947181939  | -1.72846319943017 | 2.29429352209354  |
| H  | 6.38268717797026  | 3.10268644489231  | -1.37796969818029 |
| N  | 1.16841243323571  | -0.03716077818391 | 0.86478285821467  |
| N  | 2.67728264276841  | 1.47525622317312  | 0.73571006550123  |
| C  | 0.23316161356983  | -2.05066321844172 | -0.12726044258425 |
| H  | 0.05283162497631  | -1.37024197896843 | 4.39874698814315  |
| C  | -0.49226583629965 | -2.94961260922849 | 2.41009199155411  |
| H  | -0.74825176615246 | -5.83858881676260 | 1.69697851723117  |
| C  | 0.61910221811457  | -1.56956348431702 | -1.49147045644452 |
| C  | 4.45251896986472  | 2.61190136457234  | 1.94499293295646  |

|   |                   |                   |                   |
|---|-------------------|-------------------|-------------------|
| C | -0.42247295618293 | -3.26543958106264 | 0.04182984018648  |
| C | -0.79074262035482 | -3.73196052530061 | 1.29882890133439  |
| C | 6.39186228949806  | 3.44542604103905  | 0.73918283383310  |
| H | 8.53547411547239  | 3.39164575833396  | 0.77353337503255  |
| H | -0.77858231902281 | -3.29536824477330 | 3.39867264589074  |
| C | 3.70903764665978  | 2.42534580865041  | 3.23122325500341  |
| C | 5.68025817409112  | 3.26489697673930  | 1.91996684257742  |
| C | -1.47471438694523 | -5.05574375766819 | 1.45704874621752  |
| H | -0.65340100129125 | -3.85959420580768 | -0.83694360634904 |
| H | 0.32876155716796  | -2.29806518257711 | -2.24838759324094 |
| C | 7.72606137370259  | 4.12791356270637  | 0.74250612903226  |
| H | 0.08194261469682  | 0.10577131815757  | 3.42334407966080  |
| H | 4.24011878543484  | 2.90885237013192  | 4.05081205123034  |
| H | 7.86683048587219  | 4.72603072529441  | -0.15988786786942 |
| C | 0.51338003761346  | 1.15903024129948  | 0.66373888697038  |
| H | 6.08731359074602  | 3.64493881013037  | 2.85184428404694  |
| C | 1.46443384197177  | 2.11230265565592  | 0.58248442186357  |
| H | 0.13726570565951  | -0.61762276354490 | -1.73105037705624 |
| H | -1.98501409165196 | -5.35029890386750 | 0.53882056564789  |
| H | 2.70192701375237  | 2.84692128190042  | 3.17931837046403  |
| H | -2.20341076824741 | -5.03006931370089 | 2.26963769493201  |
| H | 7.83691543551572  | 4.77614884289414  | 1.61310703278098  |
| H | -0.55999595056068 | 1.21865224302105  | 0.59750827468353  |
| H | 1.39276074179679  | 3.17639552913553  | 0.43239386004777  |
| H | 6.80976701195429  | -8.47049716915331 | 0.26092423435129  |
| H | 8.40934072629432  | -7.19363938054339 | 1.68555390725638  |
| O | 6.18259407287595  | -8.29706642403921 | 3.01732699551067  |
| C | 5.96407320299087  | -7.80206335211210 | 0.42915885258767  |
| C | 7.69500670776107  | -6.41046852763286 | 1.94475018626893  |

|   |                  |                   |                   |
|---|------------------|-------------------|-------------------|
| H | 5.02181199078275 | -8.34616170319161 | 0.36236265972751  |
| S | 6.06259019811171 | -7.12890710061495 | 2.08334190182715  |
| H | 5.96748812163299 | -6.97672490022077 | -0.28455347542307 |
| H | 7.67133138564401 | -5.63149368631666 | 1.18076036255470  |
| H | 7.93701345465114 | -5.97151928412976 | 2.91289235598346  |

**[Au(IMes)Cl] - DMSO TS**

Coordinates from ORCA-job

|    |                   |                   |                   |
|----|-------------------|-------------------|-------------------|
| H  | 6.73655667251587  | 1.28072660345651  | -1.44932141279569 |
| C  | 6.14757458931067  | 1.38474677334407  | -0.54312432644620 |
| Cl | 4.21271904295072  | -2.81037005195628 | 3.98189299876919  |
| C  | 4.21682946390757  | 0.37090143591164  | -1.79017719792035 |
| C  | 4.82324098807925  | 0.96191067872755  | -0.55531039388182 |
| Au | 3.35960098854509  | -2.03520535513573 | 1.71368620049541  |
| H  | -1.47600648049873 | -4.14081376265273 | -0.41866211234959 |
| C  | -1.18167739174671 | -3.46452545541948 | 0.37835402576745  |
| C  | 8.16955054790518  | 2.35661828746235  | 0.58804100613042  |
| C  | 6.73121943618693  | 1.93661947387697  | 0.59221230625951  |
| C  | -1.67313151178069 | -3.66774856644895 | 1.66494370260472  |
| C  | -2.61545291693919 | -4.79711197467488 | 1.95104565486863  |
| C  | -0.31995696245089 | -2.41683950264759 | 0.07970528565909  |
| C  | 0.18441749184053  | -2.21477023310554 | -1.31574255284654 |
| C  | -1.28474694704369 | -2.78847202347151 | 2.66821427835126  |
| C  | 0.05016811474506  | -1.56212075028812 | 1.11987897672663  |
| C  | 2.27516732665588  | -0.51729686523380 | 1.00740803741046  |
| C  | 4.08301471296599  | 1.10882481907171  | 0.61758809290849  |
| C  | -0.42535737353245 | -1.72235130744374 | 2.42015388433360  |
| C  | 5.95428942262034  | 2.07068356067023  | 1.73818272523770  |
| H  | -1.66062207085883 | -2.93081115810706 | 3.67672998850161  |
| N  | 0.93674288615819  | -0.47598464899375 | 0.83669162476399  |
| N  | 2.71259980846802  | 0.69940803155367  | 0.62042853712599  |
| C  | 4.62524265650854  | 1.66414147911722  | 1.77635912796141  |
| C  | -0.02938185233265 | -0.78732651412537 | 3.52058571618840  |

|   |                   |                   |                   |
|---|-------------------|-------------------|-------------------|
| C | 0.54096641060172  | 0.75374969535785  | 0.34791338117798  |
| C | 1.65890931227002  | 1.49348786360358  | 0.21152590594657  |
| H | 6.39081076596730  | 2.50967697871920  | 2.63014514871296  |
| H | -0.49212431674912 | 0.98288460632076  | 0.14761074795651  |
| H | 1.80543977595296  | 2.50319465023960  | -0.13336943504104 |
| C | 3.81285000969049  | 1.81684982200208  | 3.02487475829108  |
| H | 1.04373664535160  | -0.84727814592989 | 3.72294397656589  |
| H | -0.56448598508893 | -1.03165935497947 | 4.43813697953690  |
| H | -0.24892506136155 | 0.25139225104550  | 3.26051645334251  |
| H | -3.60274024471478 | -4.59442927094079 | 1.52499866404525  |
| H | -2.73860459725438 | -4.94757418930312 | 3.02430125118914  |
| H | -2.25934666194216 | -5.72986455242639 | 1.50783861567839  |
| H | -0.20952939710168 | -2.98541569833414 | -1.97832754458646 |
| H | 1.27640376101890  | -2.24974633346078 | -1.36242796557387 |
| H | -0.11930788497686 | -1.24103371601152 | -1.70941449492990 |
| H | 2.88567765710384  | 2.36421105185935  | 2.83729406171911  |
| H | 4.38070677723091  | 2.35350142312934  | 3.78479747184865  |
| H | 3.53264407252804  | 0.84129626372064  | 3.43263793213272  |
| H | 8.49371739781412  | 2.65011171167153  | -0.41184014112092 |
| H | 8.81216747347006  | 1.53191429928653  | 0.91223303678079  |
| H | 8.34048837393183  | 3.19085063505695  | 1.27067233452164  |
| H | 4.96373961921783  | 0.28665933051734  | -2.57947299816029 |
| H | 3.39390834843041  | 0.98602642092154  | -2.16457487702724 |
| H | 3.80848295851435  | -0.62391870849799 | -1.59311755277244 |
| H | 6.32037866110819  | -4.12654883098227 | 2.37878734669925  |
| H | 6.69861337595346  | -5.03834327991293 | 0.87228453252384  |
| C | 6.24314369624129  | -4.14017886593829 | 1.29238637301620  |
| H | 6.68329339258718  | -3.23633162171383 | 0.86893203175596  |
| O | 3.94186575258485  | -5.45051919721238 | 1.36560338751405  |



|   |                  |                   |                   |
|---|------------------|-------------------|-------------------|
| S | 4.50715126677221 | -4.15597658970299 | 0.90518989642533  |
| H | 5.14562312321618 | -5.11302484544614 | -1.16152126082438 |
| C | 4.60595161205004 | -4.20993277452754 | -0.87140947286100 |
| H | 5.11891943905738 | -3.31217417372144 | -1.21856964292604 |
| H | 3.58429382848554 | -4.22766982756430 | -1.24967307434662 |

**[Au(IMes)Cl] - DMSO AP**

Coordinates from ORCA-job

|    |                   |                   |                   |
|----|-------------------|-------------------|-------------------|
| H  | 6.73655667251587  | 1.28072660345651  | -1.44932141279569 |
| C  | 6.14757458931067  | 1.38474677334407  | -0.54312432644620 |
| Cl | 4.21271904295072  | -2.81037005195628 | 3.98189299876919  |
| C  | 4.21682946390757  | 0.37090143591164  | -1.79017719792035 |
| C  | 4.82324098807925  | 0.96191067872755  | -0.55531039388182 |
| Au | 3.35960098854509  | -2.03520535513573 | 1.71368620049541  |
| H  | -1.47600648049873 | -4.14081376265273 | -0.41866211234959 |
| C  | -1.18167739174671 | -3.46452545541948 | 0.37835402576745  |
| C  | 8.16955054790518  | 2.35661828746235  | 0.58804100613042  |
| C  | 6.73121943618693  | 1.93661947387697  | 0.59221230625951  |
| C  | -1.67313151178069 | -3.66774856644895 | 1.66494370260472  |
| C  | -2.61545291693919 | -4.79711197467488 | 1.95104565486863  |
| C  | -0.31995696245089 | -2.41683950264759 | 0.07970528565909  |
| C  | 0.18441749184053  | -2.21477023310554 | -1.31574255284654 |
| C  | -1.28474694704369 | -2.78847202347151 | 2.66821427835126  |
| C  | 0.05016811474506  | -1.56212075028812 | 1.11987897672663  |
| C  | 2.27516732665588  | -0.51729686523380 | 1.00740803741046  |
| C  | 4.08301471296599  | 1.10882481907171  | 0.61758809290849  |
| C  | -0.42535737353245 | -1.72235130744374 | 2.42015388433360  |
| C  | 5.95428942262034  | 2.07068356067023  | 1.73818272523770  |
| H  | -1.66062207085883 | -2.93081115810706 | 3.67672998850161  |
| N  | 0.93674288615819  | -0.47598464899375 | 0.83669162476399  |
| N  | 2.71259980846802  | 0.69940803155367  | 0.62042853712599  |
| C  | 4.62524265650854  | 1.66414147911722  | 1.77635912796141  |
| C  | -0.02938185233265 | -0.78732651412537 | 3.52058571618840  |

|   |                   |                   |                   |
|---|-------------------|-------------------|-------------------|
| C | 0.54096641060172  | 0.75374969535785  | 0.34791338117798  |
| C | 1.65890931227002  | 1.49348786360358  | 0.21152590594657  |
| H | 6.39081076596730  | 2.50967697871920  | 2.63014514871296  |
| H | -0.49212431674912 | 0.98288460632076  | 0.14761074795651  |
| H | 1.80543977595296  | 2.50319465023960  | -0.13336943504104 |
| C | 3.81285000969049  | 1.81684982200208  | 3.02487475829108  |
| H | 1.04373664535160  | -0.84727814592989 | 3.72294397656589  |
| H | -0.56448598508893 | -1.03165935497947 | 4.43813697953690  |
| H | -0.24892506136155 | 0.25139225104550  | 3.26051645334251  |
| H | -3.60274024471478 | -4.59442927094079 | 1.52499866404525  |
| H | -2.73860459725438 | -4.94757418930312 | 3.02430125118914  |
| H | -2.25934666194216 | -5.72986455242639 | 1.50783861567839  |
| H | -0.20952939710168 | -2.98541569833414 | -1.97832754458646 |
| H | 1.27640376101890  | -2.24974633346078 | -1.36242796557387 |
| H | -0.11930788497686 | -1.24103371601152 | -1.70941449492990 |
| H | 2.88567765710384  | 2.36421105185935  | 2.83729406171911  |
| H | 4.38070677723091  | 2.35350142312934  | 3.78479747184865  |
| H | 3.53264407252804  | 0.84129626372064  | 3.43263793213272  |
| H | 8.49371739781412  | 2.65011171167153  | -0.41184014112092 |
| H | 8.81216747347006  | 1.53191429928653  | 0.91223303678079  |
| H | 8.34048837393183  | 3.19085063505695  | 1.27067233452164  |
| H | 4.96373961921783  | 0.28665933051734  | -2.57947299816029 |
| H | 3.39390834843041  | 0.98602642092154  | -2.16457487702724 |
| H | 3.80848295851435  | -0.62391870849799 | -1.59311755277244 |
| H | 6.32037866110819  | -4.12654883098227 | 2.37878734669925  |
| H | 6.69861337595346  | -5.03834327991293 | 0.87228453252384  |
| C | 6.24314369624129  | -4.14017886593829 | 1.29238637301620  |
| H | 6.68329339258718  | -3.23633162171383 | 0.86893203175596  |
| O | 3.94186575258485  | -5.45051919721238 | 1.36560338751405  |

|   |                  |                   |                   |
|---|------------------|-------------------|-------------------|
| S | 4.50715126677221 | -4.15597658970299 | 0.90518989642533  |
| H | 5.14562312321618 | -5.11302484544614 | -1.16152126082438 |
| C | 4.60595161205004 | -4.20993277452754 | -0.87140947286100 |
| H | 5.11891943905738 | -3.31217417372144 | -1.21856964292604 |
| H | 3.58429382848554 | -4.22766982756430 | -1.24967307434662 |

**[Au(IMes)Cl] - Cys<sup>-</sup> AR**

Coordinates from ORCA-job

|    |                   |                   |                   |
|----|-------------------|-------------------|-------------------|
| Au | 3.66829003440008  | -0.09543531183774 | 3.09183645904352  |
| H  | 5.30141989893133  | -0.45396727838249 | 0.24777655941498  |
| C  | 5.49921545259490  | 0.33915614291707  | -0.47905287502568 |
| C  | 2.67071512015203  | 0.36004857054494  | 1.44327618363916  |
| H  | 0.28484232212697  | 1.01281914346297  | 3.20647180071621  |
| H  | 6.50513866636876  | 0.19631377846280  | -0.87333660066417 |
| C  | 5.37243307951552  | 1.69082073266444  | 0.15221614174189  |
| H  | 3.22487866018515  | -2.49146022274510 | 0.68473599122401  |
| C  | 6.47824900063946  | 2.52725029118928  | 0.27145388488038  |
| C  | 4.15624919644051  | 2.15112347154918  | 0.65171358770684  |
| H  | 4.78654617339760  | 0.20867866660873  | -1.29737442002374 |
| C  | 0.81980522870260  | -1.26102248182997 | 1.59422787923501  |
| C  | -0.56930305507658 | 0.47350947213135  | 2.78810640851015  |
| H  | 2.33366804552605  | 3.20816308804090  | 2.56762321801654  |
| C  | -0.21421233989240 | -0.94667173288663 | 2.47358273347716  |
| H  | 7.43466069329829  | 2.18434831965398  | -0.11080827443167 |
| N  | 1.53885230024936  | -0.19431878747843 | 0.96556324789131  |
| N  | 3.00408678790194  | 1.30851135436960  | 0.54473658060764  |
| C  | 1.16131730708859  | -2.57751496875866 | 1.28156276655273  |
| H  | -1.38470523326177 | 0.51027405692154  | 3.51034044339892  |
| C  | -0.91023441903258 | -2.00134948117030 | 3.05631791044212  |
| H  | -0.72842789295687 | -4.91913658251904 | 4.21217147101302  |
| C  | 2.27171151525345  | -2.89090726391310 | 0.32756335964779  |

|   |                   |                   |                   |
|---|-------------------|-------------------|-------------------|
| C | 4.01911678160275  | 3.40549791764065  | 1.24880347950207  |
| C | 0.43640234850173  | -3.59462574977873 | 1.88956976349665  |
| C | -0.59910686409886 | -3.32752562919172 | 2.78050355013064  |
| C | 6.38951876125277  | 3.78105378958653  | 0.86387103537333  |
| H | 7.88550116773161  | 4.76125989585502  | 2.04889650662891  |
| H | -1.71826583630283 | -1.77496833524643 | 3.74514095998923  |
| C | 2.70193520504357  | 3.87557478169009  | 1.78325248142852  |
| C | 5.15186990235298  | 4.20342586812270  | 1.34196109018376  |
| C | -1.34431043967440 | -4.44803902408518 | 3.43995930103489  |
| H | 0.69069806328408  | -4.62483273481704 | 1.65937408405948  |
| H | 2.37732661481000  | -3.96884531597073 | 0.20703346976677  |
| C | 7.59710678632791  | 4.65785181194309  | 0.99868287783655  |
| H | -0.88249766799539 | 1.01539156585243  | 1.89157568137344  |
| H | 2.79718028979355  | 4.87672698081048  | 2.20324631064366  |
| H | 8.44789286726827  | 4.24596208845977  | 0.45468213901270  |
| C | 1.16689613973453  | 0.40153071192665  | -0.22115080033172 |
| H | 5.06331562159112  | 5.18187564094105  | 1.80458726492086  |
| C | 2.09008945390798  | 1.34893188687934  | -0.48625730436008 |
| H | 2.08785871579668  | -2.45247292404947 | -0.65712989061983 |
| H | -1.60651644087473 | -5.22553019647769 | 2.71907453992351  |
| H | 1.93792491058566  | 3.90266944138394  | 1.00204204946081  |
| H | -2.25902870447703 | -4.09002637089332 | 3.91427276281687  |
| H | 7.39771002913596  | 5.66342992594521  | 0.62041276094469  |
| H | 0.28690473812299  | 0.09649366262394  | -0.76183965430795 |
| H | 2.18294549147305  | 2.04168231433367  | -1.30561722437178 |
| H | 5.50476216621523  | -6.85433366978732 | 4.50619309555389  |
| S | 3.85389888619875  | -4.69578785108238 | 4.31061850654407  |
| N | 5.05035814928299  | -7.72326962917892 | 4.22973451240704  |
| O | 5.55352437376165  | -6.76076111502936 | 1.70475337516230  |

|    |                  |                   |                  |
|----|------------------|-------------------|------------------|
| C  | 4.40526024562197 | -6.93119175616450 | 2.03232401263237 |
| H  | 4.68670567350733 | -8.12444503083416 | 5.08826146955452 |
| O  | 3.38687510579793 | -6.76387033547616 | 1.17879411549832 |
| H  | 3.75307536317452 | -6.47745688333257 | 0.32827336531261 |
| C  | 3.92047054549458 | -7.35908546792669 | 3.39800330165814 |
| C  | 3.00440092025379 | -6.27642330363792 | 3.99593652044918 |
| H  | 2.60874136584511 | -6.68462618569946 | 4.93164915438420 |
| H  | 2.15379277016288 | -6.12644331169608 | 3.32630995280179 |
| H  | 3.31090046366837 | -8.25671047257053 | 3.23333472343833 |
| Cl | 4.87146949356788 | -0.58229996806334 | 4.98537220305269 |

**[Au(IMes)Cl] - Cys: AP**

Coordinates from ORCA-job

|    |                   |                   |                   |
|----|-------------------|-------------------|-------------------|
| Au | 4.55920693070653  | -1.43652362727588 | 1.94463152017342  |
| H  | 4.51675295943294  | -0.16870754432945 | -1.32895872779258 |
| C  | 4.64459605792350  | 0.88233177238778  | -1.60305554466065 |
| C  | 3.15850540221994  | -0.10171000618428 | 1.37264109875305  |
| H  | 2.09702496804082  | -0.39901232606924 | 4.20183378497236  |
| H  | 5.27606890403264  | 0.93011686230881  | -2.49012886478649 |
| C  | 5.25838233182782  | 1.66248086756860  | -0.48157787650967 |
| H  | 2.43561874356164  | -2.14921530370118 | -0.72157532190870 |
| C  | 6.48792738794196  | 2.28901942458909  | -0.63907672620347 |
| C  | 4.62218449855170  | 1.78143246555819  | 0.75579629483601  |
| H  | 3.65532757456860  | 1.26679354756041  | -1.86489745432220 |
| C  | 1.16079946955226  | -1.48956015965978 | 1.74622620944310  |
| C  | 1.02541415983604  | -0.59171596396483 | 4.09948431701141  |
| H  | 4.39566643410643  | 1.62456146551551  | 3.61478202139810  |
| C  | 0.76265316652333  | -1.64907193206272 | 3.07231169866485  |
| H  | 6.99633236713651  | 2.20548601462721  | -1.59501143603487 |
| N  | 1.82091759558600  | -0.27865762941754 | 1.36331319034350  |
| N  | 3.34475788740061  | 1.15936178700184  | 0.93247901064500  |
| C  | 0.92220489999113  | -2.46179426747953 | 0.77312068676875  |
| H  | 0.63882412601573  | -0.89939329531317 | 5.07090962555701  |
| C  | 0.11364994628907  | -2.83156309944778 | 3.41581529026500  |
| H  | -0.09317671861551 | -5.92278550795363 | 2.95144096423399  |
| C  | 1.35075325380107  | -2.26656506462199 | -0.64849025047231 |



|   |                   |                   |                   |
|---|-------------------|-------------------|-------------------|
| C | 5.17792670292146  | 2.49777133242074  | 1.81381947264997  |
| C | 0.27230600792088  | -3.62514434790189 | 1.16673677147215  |
| C | -0.13692861607336 | -3.83000142347614 | 2.48157309742398  |
| C | 7.07961503759350  | 3.01588487384674  | 0.39099876806245  |
| H | 8.77173122771985  | 4.12830701348289  | 1.11297202137080  |
| H | -0.20491630989366 | -2.97159612695212 | 4.44430509485539  |
| C | 4.48568902466520  | 2.60494723078758  | 3.13779334804737  |
| C | 6.41243815966385  | 3.10796218138948  | 1.60665614368784  |
| C | -0.81699307712956 | -5.10523398111561 | 2.87881852894536  |
| H | 0.07824965857997  | -4.39122508457927 | 0.42195420645826  |
| H | 1.05732351069106  | -3.12280399633051 | -1.25571124226287 |
| C | 8.40152508756836  | 3.69198508703676  | 0.18440612902126  |
| H | 0.55437344353445  | 0.35672017656364  | 3.82790674981607  |
| H | 5.04479800162519  | 3.25960726021845  | 3.80637061048478  |
| H | 9.14915688816695  | 2.98756443496616  | -0.18877340076667 |
| C | 1.17667166794654  | 0.85939055452450  | 0.92395151055811  |
| H | 6.85943766016692  | 3.67485488923306  | 2.41928791946500  |
| C | 2.13779229624984  | 1.76582590980153  | 0.65142067754747  |
| H | 0.90200962617766  | -1.36898371705062 | -1.08227427389277 |
| H | -1.56330317683895 | -5.40155498160227 | 2.13841698600501  |
| H | 3.47336549597156  | 3.00363609595430  | 3.03284319788309  |
| H | -1.30762116201303 | -5.00731736244958 | 3.84815870932898  |
| H | 8.31799166434679  | 4.49268440487796  | -0.55624969580486 |
| H | 0.10392637406981  | 0.91665381151135  | 0.84641861079840  |
| H | 2.07743916221338  | 2.77707463556587  | 0.28543447655556  |
| H | 3.98230724112006  | -2.25782743319171 | 4.56040322884712  |
| S | 6.21604075055851  | -2.91678407307408 | 2.54768530359060  |
| N | 3.75375503906120  | -3.17806523609712 | 4.92627729123242  |
| O | 6.05719994241775  | -2.42413280296323 | 6.19041627524082  |

|    |                  |                   |                  |
|----|------------------|-------------------|------------------|
| C  | 6.02865210308542 | -3.51223236463394 | 5.67267272032504 |
| H  | 3.00857279711442 | -3.54052585248956 | 4.34110738225914 |
| O  | 7.01876725681293 | -4.39968537750223 | 5.79584355764182 |
| H  | 7.71979841928234 | -4.00141777072546 | 6.33476234426346 |
| C  | 4.90425129841875 | -4.04502421955235 | 4.81341613188951 |
| C  | 5.41335699309896 | -4.32140868331662 | 3.38794219701760 |
| H  | 4.57208963404839 | -4.68562697514120 | 2.79621424192858 |
| H  | 6.16246763933422 | -5.11503512688052 | 3.42451649578645 |
| H  | 4.63537878620044 | -5.02297765659288 | 5.23219086340077 |
| Cl | 8.07134539716935 | 5.50862622180186  | 4.36025403849078 |

### [Au(IMes)Cl] - Ligand Scrambling AR

Coordinates from ORCA-job

|    |                   |                   |                   |
|----|-------------------|-------------------|-------------------|
| H  | 6.74041011531636  | 1.85363878010782  | -3.02270581400573 |
| C  | 6.37321296172896  | 2.21044729569819  | -2.06513368532830 |
| Cl | 5.90916190958885  | -1.98702795043303 | 2.33506201774057  |
| C  | 4.26018538331555  | 0.92579389124233  | -2.50157477943500 |
| C  | 5.10558685355742  | 1.82185641039640  | -1.65029791521345 |
| Au | 4.39324055864160  | -0.47042602003741 | 1.51411619192668  |
| H  | -0.53675757044384 | -3.06972820687208 | 1.44718240209029  |
| C  | -0.14938647105378 | -2.17213418126306 | 1.91943597512222  |
| C  | 8.55308871459237  | 3.41620447977851  | -1.75038591769769 |
| C  | 7.17849532860279  | 3.03878484549112  | -1.28905236465938 |
| C  | -0.36116266326914 | -1.96893757970980 | 3.27837115474775  |
| C  | -1.08640284292214 | -2.98665074724910 | 4.10512882814890  |
| C  | 0.54761794616715  | -1.25527454290363 | 1.13927556403195  |
| C  | 0.76593333152369  | -1.49997568017274 | -0.32184150772953 |
| C  | 0.13433055220242  | -0.80653571297762 | 3.86165616600496  |
| C  | 1.03589235861983  | -0.11086580687512 | 1.76754892595715  |
| C  | 3.08955667631208  | 0.83940166670709  | 0.80358129504346  |
| C  | 4.65373450838760  | 2.29325681776547  | -0.41713889833882 |
| C  | 0.83737108367930  | 0.13941630205346  | 3.12566543045953  |
| C  | 6.68459511087389  | 3.49133805455244  | -0.07103836916005 |
| H  | -0.03055399175299 | -0.62801958351784 | 4.92018496997029  |
| N  | 1.75470009201116  | 0.85237709316801  | 0.98947890752543  |
| N  | 3.34827924020190  | 1.91266300956985  | 0.03023806200153  |

|    |                   |                   |                   |
|----|-------------------|-------------------|-------------------|
| C  | 5.42160025699824  | 3.13229518383127  | 0.38836451826977  |
| C  | 1.36482980347625  | 1.38084916921769  | 3.77631291258672  |
| C  | 1.18154111402956  | 1.92409848850569  | 0.33853737256556  |
| C  | 2.18581343155990  | 2.59198741473000  | -0.26657059071612 |
| H  | 7.29602505414297  | 4.14540545655778  | 0.54290950999824  |
| H  | 0.12101808677023  | 2.10951455901475  | 0.36759755884309  |
| H  | 2.18270739194524  | 3.48127183243151  | -0.87410876075434 |
| C  | 4.91393756659479  | 3.63213248927264  | 1.70532549364837  |
| H  | 2.45278074424986  | 1.44311798894564  | 3.68514735539294  |
| H  | 1.10926543699241  | 1.39321143694170  | 4.83567392964397  |
| H  | 0.95274102178606  | 2.28158543561820  | 3.31361339796992  |
| H  | -1.70447497956048 | -3.63574731037407 | 3.48309308556853  |
| H  | -1.72237534800646 | -2.50841148616119 | 4.85273083057132  |
| H  | -0.37661847555083 | -3.62247600374146 | 4.64398057112746  |
| H  | 0.29346477069758  | -2.43376514832946 | -0.62616384757321 |
| H  | 1.83206055097202  | -1.56234873478180 | -0.55743902885249 |
| H  | 0.35063817928383  | -0.69196309644831 | -0.92992682944794 |
| H  | 3.96868166143126  | 4.16933054407872  | 1.59200166129204  |
| H  | 5.63860256203159  | 4.30642242383664  | 2.16138547571804  |
| H  | 4.73156781005156  | 2.80533281972577  | 2.39755212425644  |
| H  | 8.56534788941003  | 3.63333647642934  | -2.82047238389896 |
| H  | 9.25632714731821  | 2.59536843606231  | -1.57902957940560 |
| H  | 8.92486261748116  | 4.28928185384788  | -1.21243905211556 |
| H  | 4.79705197956431  | 0.64417132473209  | -3.40726362535653 |
| H  | 3.32816611012030  | 1.41630444295468  | -2.79501170182280 |
| H  | 3.98640573009817  | 0.01288711256463  | -1.96574399192476 |
| Cl | -0.48324958597839 | 0.19106822217746  | 7.81783712246076  |
| Au | 1.04010232462283  | -1.32410023514017 | 8.62704554773561  |
| H  | -3.48055722911670 | -6.34390893203233 | 8.90557020288416  |

|   |                   |                   |                   |
|---|-------------------|-------------------|-------------------|
| H | 5.80455187048360  | 3.01220979167562  | 7.53242476227861  |
| H | 7.29232322689240  | 2.09707390398254  | 7.31106409135821  |
| C | -2.94762200932371 | -6.47794395684223 | 9.84937301757640  |
| C | 6.48885404838974  | 2.30982397181357  | 8.01881370476958  |
| C | 5.76642830774327  | 1.05772959498245  | 8.41350248589998  |
| C | -1.62622791358146 | -5.77164056870852 | 9.83012032506565  |
| C | 5.58126818188962  | 0.02579321506386  | 7.49880282285022  |
| H | 5.98661609431877  | 0.12166780251886  | 6.49604365418356  |
| H | -3.57955590513477 | -6.11475012825844 | 10.66078929285041 |
| C | -0.80719487897633 | -5.83195242245330 | 8.70625755138500  |
| H | 3.64200504458840  | -2.37451052383909 | 6.59868805848340  |
| H | -2.80828939242390 | -7.55402324740623 | 9.99123051764276  |
| H | -1.14047109250837 | -6.38134946529548 | 7.83097419426702  |
| C | -1.18157585122181 | -5.05706314253374 | 10.93633182615974 |
| C | 5.24850748378230  | 0.90805915571872  | 9.69538519563674  |
| H | 1.39673784959732  | -4.29359276271278 | 6.97996305119975  |
| C | 2.35709731964858  | -2.61905581170486 | 9.33990101759908  |
| H | 5.22100415530117  | -1.98992778754269 | 5.89894050570997  |
| C | 4.89182256242568  | -1.13436747106193 | 7.83137604361837  |
| H | -1.81098418873528 | -4.99329261967679 | 11.81856176641747 |
| H | 0.65589292884918  | -2.58891917409556 | 11.90847870445172 |
| H | 5.39050174360181  | 1.70079389856838  | 10.42351711766208 |
| C | 4.70170212451487  | -2.22868888627903 | 6.82705826243554  |
| C | 0.43325240796036  | -5.20780314629423 | 8.66826904410160  |
| H | 2.92362868369558  | -0.52649052469338 | 11.45161785116506 |
| H | 0.84967420940303  | -5.95328546783732 | 6.70776364469598  |
| C | 0.05263600568457  | -4.41469508158649 | 10.94865859083611 |
| C | 4.55212693050152  | -0.23349029991072 | 10.07800495239634 |
| C | 1.29019204017427  | -5.27934270229344 | 7.44234139392694  |

|   |                   |                   |                   |
|---|-------------------|-------------------|-------------------|
| H | 6.91276920639322  | 2.81369018673905  | 8.88883975875113  |
| C | 4.38350257363598  | -1.23833088730710 | 9.12645498029771  |
| C | 0.84060659940108  | -4.50426098255661 | 9.80284947224005  |
| C | 0.50315842064058  | -3.64434880111261 | 12.15085825036595 |
| C | 4.00552675144093  | -0.36914260080878 | 11.46555967880414 |
| H | -0.24115910280717 | -3.70806212692058 | 12.94437194375209 |
| N | 3.68271500573008  | -2.43123240306134 | 9.49573246007257  |
| N | 2.12260540226026  | -3.86678938619787 | 9.79316318789127  |
| H | 4.21334933606995  | 0.52970008997799  | 12.04583163928527 |
| H | 5.08323951041018  | -3.18366993553389 | 7.19732713291743  |
| H | 2.29718175884788  | -5.63455917300433 | 7.67487165396344  |
| H | 1.45162168578208  | -4.02387096927130 | 12.53985804608638 |
| H | 4.44718957002810  | -1.22251536584707 | 11.98737728950133 |
| C | 4.27368223650221  | -3.54982163737662 | 10.04368833276751 |
| C | 3.29050259955982  | -4.45440737406532 | 10.23128030603295 |
| H | 5.33066629519553  | -3.59723426144035 | 10.24480762936327 |
| H | 3.31185735406776  | -5.45446531449638 | 10.63047887340889 |

### [Au(IMes)Cl] - Ligand Scrambling TS

Coordinates from ORCA-job

|    |                   |                   |                   |
|----|-------------------|-------------------|-------------------|
| H  | 5.11935812704035  | -1.88667442385712 | -0.25239778272758 |
| C  | 4.73833332818815  | -0.95675071628363 | 0.15800292173535  |
| Cl | 7.71409700700373  | -0.12104665814877 | 3.83739291212168  |
| C  | 2.56976330226367  | -2.14612575586228 | 0.59317923459111  |
| C  | 3.43933849768687  | -0.92986541742131 | 0.65579177247639  |
| Au | 2.34669866555020  | -0.83125841057015 | 4.38627982840628  |
| H  | -3.19304137892254 | -2.42177319560621 | 5.06174261881652  |
| C  | -2.58193645865881 | -1.52454652042872 | 5.08313130509668  |
| C  | 6.94183183253571  | 0.12378613774969  | -0.38943969352721 |
| C  | 5.54971528861068  | 0.17127581601989  | 0.16203062640519  |
| C  | -2.66920255788080 | -0.66313615708602 | 6.17130381183654  |
| C  | -3.56801170779139 | -0.97969169966468 | 7.32720638817108  |
| C  | -1.73433200206022 | -1.26994185620746 | 4.01120725732493  |
| C  | -1.68754825610442 | -2.19838998717903 | 2.83775556718777  |
| C  | -1.88936853107283 | 0.48851787878941  | 6.16864594813244  |
| C  | -0.95398106468789 | -0.11478079942058 | 4.06197128888223  |
| C  | 1.23397836120848  | -0.07887070338230 | 2.91254894883905  |
| C  | 2.97420925344592  | 0.27146814160530  | 1.18605387176805  |
| C  | -1.02411187769704 | 0.78910885403888  | 5.12243196281026  |
| C  | 5.03404910516769  | 1.35668733769118  | 0.67836796828973  |
| H  | -1.95943319059291 | 1.18174366350198  | 7.00132063207041  |
| N  | -0.08930514030135 | 0.17403501495005  | 2.95747763012262  |
| N  | 1.63558881428591  | 0.33147033439021  | 1.69299593043588  |
| C  | 3.74597265260116  | 1.43529654661530  | 1.19157974178248  |
| C  | -0.21582237841610 | 2.04941250816543  | 5.13769878159798  |

|    |                   |                   |                   |
|----|-------------------|-------------------|-------------------|
| C  | -0.51556401796218 | 0.73347668585413  | 1.77182266742614  |
| C  | 0.56869806751670  | 0.83157741015063  | 0.97699079889500  |
| H  | 5.65159962067196  | 2.24973419322930  | 0.68432494785315  |
| H  | -1.54450871744487 | 1.00578225391895  | 1.60776887455657  |
| H  | 0.68305247411020  | 1.20744947766846  | -0.02576469227650 |
| C  | 3.20844957471168  | 2.73135113711139  | 1.71386340909280  |
| H  | 0.85538577908544  | 1.83753598102984  | 5.19363399372495  |
| H  | -0.48565431119313 | 2.66237611296434  | 5.99762917748227  |
| H  | -0.37944083158174 | 2.63778079804891  | 4.23100101912701  |
| H  | -4.45333005482270 | -1.52863445914018 | 7.00130912781107  |
| H  | -3.88721855191857 | -0.07175379342378 | 7.84142331355617  |
| H  | -3.04694999960444 | -1.60553604210507 | 8.05877465658065  |
| H  | -2.18141291054953 | -3.13989593027716 | 3.07793115953918  |
| H  | -0.66171590378016 | -2.41391660121427 | 2.53261623457388  |
| H  | -2.19696533225390 | -1.76329792430253 | 1.97261203660877  |
| H  | 2.83334248680381  | 2.62745654600728  | 2.73452053569588  |
| H  | 2.38183557106062  | 3.09476721103142  | 1.09690519385690  |
| H  | 3.98876516190850  | 3.49232386255396  | 1.71324209723663  |
| H  | 7.66236283969914  | 0.51240324129103  | 0.33454264474094  |
| H  | 7.02474872027438  | 0.73955101380893  | -1.28967550505683 |
| H  | 7.22988115892584  | -0.89563922426455 | -0.64863901458136 |
| H  | 3.11528227153217  | -2.98355424344224 | 0.15836119310633  |
| H  | 1.68069836925136  | -1.96227534904704 | -0.01698463492622 |
| H  | 2.22329228140183  | -2.43987661052106 | 1.58599074004341  |
| Cl | 4.01256830799144  | 2.24937455640075  | 5.43589474193319  |
| Au | 4.05575824620512  | 0.14339228050776  | 6.33048618996522  |
| H  | 0.73453524550920  | -4.50266600717563 | 1.78183279668802  |
| H  | 7.42130922648531  | 3.41436534801858  | 10.57766722541026 |
| H  | 8.46856833764673  | 2.27866025578852  | 11.42301698600612 |



|   |                   |                   |                   |
|---|-------------------|-------------------|-------------------|
| C | 0.93958768460785  | -5.18253903022162 | 2.61477933624179  |
| C | 7.42598604800150  | 2.51951015396589  | 11.20809993606753 |
| C | 6.73858527914494  | 1.38475207675606  | 10.51246778205638 |
| C | 1.64809513922001  | -4.46323419805266 | 3.71907022366052  |
| C | 7.44066961557830  | 0.55749440370283  | 9.64189720347186  |
| H | 8.50275074977877  | 0.72207515234153  | 9.48885586019014  |
| H | -0.01440075681013 | -5.58797293473934 | 2.95388863283460  |
| C | 3.02256062731665  | -4.24637317510840 | 3.65017106719884  |
| H | 7.19382483837039  | -1.31117095384507 | 7.00715769201144  |
| H | 1.55095468100039  | -5.99784841510448 | 2.22336261435600  |
| H | 3.57725761284142  | -4.60985691419772 | 2.79118994227154  |
| C | 0.95213559462271  | -3.98621241865382 | 4.82296005156932  |
| C | 5.38165221911208  | 1.14802059332920  | 10.70446865558345 |
| H | 5.58504819228659  | -3.82632202349609 | 3.65364363152783  |
| C | 4.17710435860460  | -1.58341150707284 | 7.28092359834089  |
| H | 8.64103181162762  | -1.03714274466623 | 7.98532591936430  |
| C | 6.82122410003372  | -0.48015546334015 | 8.95588542148090  |
| H | -0.12007308671905 | -4.13933167782553 | 4.88661191183348  |
| H | 1.18984237465584  | -1.98145331133693 | 7.49957385105561  |
| H | 4.82220152329666  | 1.77669344217177  | 11.39028164133840 |
| C | 7.59898718526074  | -1.35407056217884 | 8.02177538560328  |
| C | 3.72018501329582  | -3.61482001293171 | 4.67011955475314  |
| H | 2.68138579770459  | 0.04440492417495  | 9.34477050607806  |
| H | 5.68442894592077  | -4.07130135978500 | 5.40278105158201  |
| C | 1.59416279616810  | -3.34282004426325 | 5.87652087077258  |
| C | 4.71397823707330  | 0.12345749068600  | 10.04281187682453 |
| C | 5.20849749011359  | -3.47955824558979 | 4.61539462439329  |
| H | 6.92409113072588  | 2.77415870675598  | 12.14288460930496 |
| C | 5.45545717189264  | -0.67058642702377 | 9.16832072970555  |

|   |                   |                   |                   |
|---|-------------------|-------------------|-------------------|
| C | 2.98511117860178  | -3.17019572138577 | 5.78485935960089  |
| C | 0.83241414085498  | -2.93074694819430 | 7.09735635226879  |
| C | 3.25170724200469  | -0.10935805230049 | 10.26534380192505 |
| H | -0.22836281371711 | -2.83511842841521 | 6.86552746349576  |
| N | 4.79307655433312  | -1.73222270283899 | 8.46855750329936  |
| N | 3.70161862520461  | -2.79987248786865 | 6.96637637904090  |
| H | 2.86883776562157  | 0.57657258570910  | 11.02073646305436 |
| H | 7.57050846806108  | -2.40076850564220 | 8.33605171278517  |
| H | 5.52345923982384  | -2.44307679499625 | 4.75588205871466  |
| H | 0.93722892390221  | -3.68036262490728 | 7.88786126537305  |
| H | 3.05488555064388  | -1.13165520589196 | 10.59851983103707 |
| C | 4.70542138453450  | -3.03718839164722 | 8.89980679146846  |
| C | 4.01897263910478  | -3.71103910435551 | 7.95494747079422  |
| H | 5.13824328794393  | -3.36199897343776 | 9.83102523920641  |
| H | 3.72876263105456  | -4.74611627003273 | 7.88964672279147  |

## [Au(IMes)Cl] - Ligand Scrambling AP

Coordinates from ORCA-job

|   |                   |                   |                   |
|---|-------------------|-------------------|-------------------|
| H | 7.35067055102705  | -2.14034572127198 | -2.45555889153903 |
| C | 7.06331714727947  | -1.69259632385905 | -1.50918927868681 |
| C | 4.79834117197100  | -2.73246627123474 | -1.81454832470204 |
| C | 5.77104508114064  | -1.90008562450997 | -1.03818399527966 |
| H | -0.36087008777548 | -5.91218167158879 | 2.21965805418262  |
| C | 0.15000916291019  | -5.07342916812749 | 2.68243172502145  |
| C | 9.38284571494792  | -0.74234980912600 | -1.31939394178286 |
| C | 7.98769529477493  | -0.92856730390801 | -0.80531292176497 |
| C | 0.01138228125092  | -4.85901425901599 | 4.04841838854686  |
| C | -0.84256166374329 | -5.75697217542318 | 4.89080002001168  |
| C | 0.93185689345588  | -4.24399272352805 | 1.88390161091732  |
| C | 1.07523032889135  | -4.50539148711391 | 0.41658565143882  |
| C | 0.67737664129785  | -3.77933969739945 | 4.62166719694157  |
| C | 1.58491191225190  | -3.17907722135916 | 2.50140444430670  |
| C | 3.70814243966311  | -2.54157293182553 | 1.44274534162600  |
| C | 5.42276831878120  | -1.31340681879150 | 0.17786893915545  |
| C | 1.47185352434654  | -2.92407474252631 | 3.86908674985892  |
| C | 7.59534186910930  | -0.35933799869301 | 0.40173156053035  |
| H | 0.58461153700016  | -3.60104904003106 | 5.68855149222364  |
| N | 2.40591757442566  | -2.31643178601737 | 1.70587826136737  |
| N | 4.09549997771378  | -1.49851475968490 | 0.68275671553991  |
| C | 6.31662226592389  | -0.53787878604914 | 0.91649261483808  |
| C | 2.18853125215885  | -1.77843393690133 | 4.51439024440294  |
| C | 1.98058510744273  | -1.14547816441372 | 1.11744941366086  |
| C | 3.04713452430116  | -0.62931369937122 | 0.47071217678678  |

|    |                   |                   |                   |
|----|-------------------|-------------------|-------------------|
| H  | 8.30294897604227  | 0.24383120716105  | 0.96230443479369  |
| H  | 0.96750446101122  | -0.79206801122100 | 1.21154166701337  |
| H  | 3.15668105487777  | 0.26739262737011  | -0.11574489046951 |
| C  | 5.92549355027335  | 0.07856808461173  | 2.22385766353421  |
| H  | 3.26899561432807  | -1.85101037540964 | 4.36244302180144  |
| H  | 1.99372133453484  | -1.76472628631451 | 5.58673814805564  |
| H  | 1.86998860891692  | -0.81984909723946 | 4.09617322997192  |
| H  | -1.77092795673561 | -5.25339309114636 | 5.17676304119244  |
| H  | -0.32803437902437 | -6.03198984800742 | 5.81504173120803  |
| H  | -1.10792957086747 | -6.66939418908686 | 4.35511672033436  |
| H  | 0.42818895619878  | -5.32743287131789 | 0.11056496876233  |
| H  | 2.10608734454892  | -4.77168564512036 | 0.16499967066886  |
| H  | 0.81750325399521  | -3.62421065960438 | -0.17624824675744 |
| H  | 5.08657517534359  | 0.76995897258526  | 2.10846313125200  |
| H  | 6.76420627131362  | 0.62934764285935  | 2.64933127185157  |
| H  | 5.61575555877104  | -0.68371671175920 | 2.94421829821412  |
| H  | 9.42251646215228  | -0.84222824774033 | -2.40525553801382 |
| H  | 10.05306282657338 | -1.49658683977873 | -0.89480589787272 |
| H  | 9.77861838922582  | 0.23657559593398  | -1.04290552077040 |
| H  | 5.24647673945194  | -3.06846514831660 | -2.74953275115584 |
| H  | 3.88930832946692  | -2.17296693066955 | -2.05090565564078 |
| H  | 4.49230949962874  | -3.61474588490147 | -1.24507292684576 |
| Au | 4.80093619189369  | -4.14199493924374 | 2.01855723231988  |
| H  | 0.87788509539751  | -7.85699852717294 | -1.63421446349766 |
| H  | 8.60162834829787  | -0.52987954108772 | 6.08832214889448  |
| H  | 10.17186624540507 | -0.96799552967010 | 5.40290295716524  |
| C  | 1.48488711576097  | -8.71880616626353 | -1.33854769555084 |
| C  | 9.32252927658694  | -1.34446766073366 | 5.97397050982914  |
| C  | 8.69281640200311  | -2.52293738962441 | 5.29600942570320  |

|   |                  |                   |                   |
|---|------------------|-------------------|-------------------|
| C | 2.57876206168724 | -8.29700735419609 | -0.40567135236695 |
| C | 9.12364972795296 | -2.94283492831510 | 4.04360196519214  |
| H | 9.93241497558210 | -2.41095188568314 | 3.55201663328522  |
| H | 0.81871942010960 | -9.44241345533777 | -0.86608026996860 |
| C | 3.79413815684193 | -7.83357293079262 | -0.89883862301085 |
| H | 8.22625114006619 | -4.40888340758791 | 1.30299738775179  |
| H | 1.89042250333770 | -9.15935054720288 | -2.25114765638897 |
| H | 3.95830028613897 | -7.80333564441183 | -1.97169240476854 |
| C | 2.39587705773715 | -8.33845090128749 | 0.97212108755324  |
| C | 7.65638923281491 | -3.22099255315447 | 5.90996326698012  |
| H | 6.25295968404938 | -5.85008077343682 | -0.39027855971365 |
| C | 5.85319744665312 | -5.77354250931344 | 2.58018241868968  |
| H | 9.84448440920086 | -3.81830273484483 | 1.70859636724887  |
| C | 8.54794772079196 | -4.03130150816531 | 3.39497031446003  |
| H | 1.45581610002235 | -8.70242950319314 | 1.37524133047634  |
| H | 3.26931675571269 | -6.99069680919367 | 3.79181268921270  |
| H | 7.30856960209667 | -2.90915301503137 | 6.89019630105905  |
| C | 9.02931447710552 | -4.45961292646886 | 2.04355578351902  |
| C | 4.81565888533322 | -7.41098482071742 | -0.05597433755601 |
| H | 5.01832812281671 | -5.01293989444986 | 5.38841764979909  |
| H | 6.12966220872782 | -7.03376610111098 | -1.69896177605251 |
| C | 3.38575810338219 | -7.92658054368356 | 1.85778686781433  |
| C | 7.04927830607302 | -4.31378339238792 | 5.30481957256352  |
| C | 6.11110670745385 | -6.91094658043523 | -0.61614579665813 |
| H | 9.66997843922925 | -1.60805012496720 | 6.97616637384487  |
| C | 7.51211863171046 | -4.69825542982823 | 4.04521127176109  |
| C | 4.58625067380620 | -7.46461514577747 | 1.31919227348751  |
| C | 3.15913889148311 | -7.97896520605363 | 3.33675601966319  |
| C | 5.93462906354999 | -5.04669050691937 | 5.98432613067616  |

|    |                  |                   |                   |
|----|------------------|-------------------|-------------------|
| H  | 2.15636183555173 | -8.34552532547345 | 3.55587582262546  |
| N  | 6.91495724490154 | -5.83264588180511 | 3.40717727142293  |
| N  | 5.62810955549287 | -7.04990947612852 | 2.21014814159447  |
| H  | 5.72517591740556 | -4.60380485016637 | 6.95782433263921  |
| H  | 9.38859448641818 | -5.49209118217354 | 2.05500513090567  |
| H  | 6.96571856208523 | -7.44563927945712 | -0.19395756337427 |
| H  | 3.87709339478124 | -8.63921519715730 | 3.83043067300584  |
| H  | 6.17959379472738 | -6.10156658346132 | 6.13382128100188  |
| C  | 7.35151010260672 | -7.13153806063297 | 3.55453670958924  |
| C  | 6.53922813691331 | -7.89993070465960 | 2.79852872706371  |
| H  | 8.19230022066596 | -7.38550060765127 | 4.17793829381893  |
| H  | 6.52575337796197 | -8.96295180788415 | 2.62579091497402  |
| Au | 2.20808595508384 | -5.80119690714502 | 8.23762168563332  |
| Cl | 1.47741654704372 | -3.77385232303073 | 8.96646532238174  |
| Cl | 2.94336408096893 | -7.82805309654161 | 7.51230339456845  |

## References

- 1 P. De Frémont, N. M. Scott, E. D. Stevens and S. P. Nolan, *Organometallics*, 2005, **24**, 2411-2418. <https://doi.org/10.1021/om050111c>.
- 2 S. Díez-González, E. C. Escudero-Adán, J. Benet-Buchholz, E. D. Stevens, A. M. Z. Slawin and S. P. Nolan, *Dalton Transactions*, 2010, **39**, 7595–7606. <https://doi.org/10.1039/C0DT00218F>.
